# Supplementary material for: Acridinone-Sulfonamide Hybrids: Synthesis, photophysical properties, DFT Analysis, and Antiviral Docking Against Adenovirus
Source: Research Square preprint supplement (doi:10.21203/rs.3.rs-8612328/v1), 2026-02-05
Supplement: Supplementary file 1 [file d45985498cc5ccea74e0c3f6.docx]

**Acridinone-Sulfonamide Hybrids: Synthesis, photophysical properties, DFT Analysis, and Antiviral Docking Against Adenovirus**

**Supporting Data**

Shanmugavel Balamurugan, Vijayaparthasarathi Vijayakumar.

Department of Chemistry, School of Advanced Sciences, Vellore Institute of

Technology, Vellore- 632014, India.

**Table of Contents**

1. General synthesis procedure

2. Synthesis Procedure for substrate scope **(6a-6j)**

3. Synthesis Procedure for substrate scope **(10a-10j)**

4. DFT, FMO, MEP Calculation for Substrate Scope **(6a-6j)** & **(10a-10j)**:

5. Docking Studies

6. **IR**, **1H**, **13C**, **DEPT-135** and **2D** NMR and **HRMS** Spectra

**1. General procedure for the synthesis of 6a-6j**

A mixture containing (0.001 mmol, 1.0 equiv.) of 7-amino-3,3-dimethyl-9-phenyl-3,4-dihydroacridin-1(2*H*)-one, substituted sulfonyl chloride (0.0015 mmol, 1.5 equiv.), and pyridine (0.003 mmol, 3.0 equiv.) in 10 mL of DCM was stirred in a round-bottom flask at reflux for 30 minutes. TLC monitored the reaction. Once complete, the mixture was poured into ice-cold water, and the pH was adjusted to 7-8 with 10% dilute hydrochloric acid (HCl). The product was extracted with ethyl acetate (2 x 100 mL). The organic phase was washed with 40% brine, filtered through Na₂SO₄ to remove moisture, and purified by steam distillation. Final purification was achieved via column chromatography on silica (60-120 mesh) using 30% ethyl acetate in hexane as the eluent, yielding the pure compounds (6a-6j and 10a-10j).

**Step-01:** Preparation of 3,3-dimethyl-7-nitro-9-phenyl-3,4-dihydroacridin-1(2*H*)-one **(3)**

(2-Amino-5-nitrophenyl) (phenyl)methanone (2g, 0.0825 mol) was reacted with 5,5-dimethylcyclohexane-1,3-dione (0.8677g, 0.0619 mol) and Con.HCl (1 mL) in 50 mL of AR-grade ethanol in a 250 mL round-bottom flask, with continuous stirring at 78 °C for 12 hours. After confirming the reaction by TLC, the mixture was poured into an ice-cold water bath, causing precipitation. The precipitate was filtered and washed with n-hexane. The crude product was purified via column chromatography on silica gel (60-120 mesh) using a 1:1 mixture of ethanol and hexane as the eluent. **1H NMR** (400 MHz, CDCl3): δ 8.51 (dd, J = 2.40, 9.20 Hz, 1H), 8.44 (d, J = 9 Hz, 1H), 8.19 (d, J = 9.20 Hz, 1H), 7.56 (t, J = 3.20 Hz, 3H), 7.20-7.20 (m, 2H), 3.32 (s, 2H), 2.62 (s, 2H), 1.18 (s, 6H). **13C NMR** (100 MHz, CDCl3): δ 197.19, 165.12, 152.84, 150.79, 145.57, 135.76, 130.49, 128.60, 126.75, 125.09, 124.87, 124.16, 54.10, 48.61, 32.27, and 28.37.

**Step-02:** The Preparation 7-amino-3,3-dimethyl-9-phenyl-3,4-dihydroacridin-1(2*H*)-one **(4)**

A mixture of 3,3-Dimethyl-7-nitro-9-phenyl-3,4-dihydroacridin-1 (2*H*)-one (2 g, 0.0578 mol), SnCl₂ (1.1337 g, 0.1734 mol), and Con.HCl (0.5 mL) was dissolved in 25 mL of AR-grade ethanol in a 250 mL round-bottom flask. The mixture was stirred continuously at 70 °C for 45 minutes, with monitoring via TLC. Once complete, the reaction mixture was poured into ice-cold water, and the pH was adjusted to approximately 7-8 using 20% NaOH. A noticeable colour change from red to yellow was observed. The mixture was then extracted with ethyl acetate twice, 100 mL each time. The organic layer was washed with brine water twice, then concentrated under high vacuum to obtain a solid product. This product was characterised as previously described. Its structure was confirmed by **¹H NMR** (400 MHz, CDCl3), showing δ 7.88 (d, J = 9.20 Hz, 1H), 7.50-7.48 (m, 3H), 7.20 (dd, J = 2.80, 7.56 Hz, 1H), 7.16 (d, J = 6.40 Hz, 2H), 6.49 (d, J = 2.80 Hz, 1H), 3.20 (s, 2H), 2.52 (s, 2H), 1.14 (s, 6H).

**Step-03:** Sulfonation of 7-amino-3,3-dimethyl-9-phenyl-3,4-dihydroacridin-1(2*H*)-ones **(6a-6j)**

**Scheme-01:**

N-(6,6-dimethyl-8-oxo-9-phenyl-5,6,7,8-tetrahydroacridin-2-yl) alkylsulfonamide

**Substrate Scope(6a-6j):**

**Scheme-02**

**Step-03:** Sulfonation of 7-amino-3,3-dimethyl-9-phenyl-3,4-dihydroacridin-1(2H)-one **(10a-10j)**

**Substrate Scope (10a-10j):**

**Plausible Mechanism**

**2. Synthesis Procedure for substrate scope (6a-6j)**

N-(6,6-dimethyl-8-oxo-9-phenyl-5,6,7,8-tetrahydroacridin-2-yl)-4-methylbenzene sulfonamide **(6a)**

A mixture of 7-Amino-3,3-dimethyl-9-phenyl-3,4-dihydroacridin-1(2*H*)-one (250 mg, 0.7907 mmol), 4-methylbenzenesulfonyl chloride (225 mg, 1.1842 mmol), and pyridine (0.18 mL, 2.3640 mmol) was stirred in 10 mL of dichloromethane (DCM) at reflux for 30 minutes. The compound was then isolated using silica gel chromatography (60/120 mesh) with a **30%** ethyl acetate in hexane mixture. Thin-layer chromatography (TLC) showed an Rf value of **0.3** (ethyl acetate/hexane, 4:6) under UV light after staining with H2SO4 and KMnO4. The melting point was between 130 °C and 135 °C. **1H NMR:** 400 MHz, CDCl3: δ 7.98 (d, J = 7.60 Hz, 1H), 7.48-7.45 (m, 6H), 7.10 (d, J = 7.60 Hz, 2H), 7.07-6.98 (m, 2H), 6.94 (d, J = 18.00 Hz, 1H), 3.21 (s, 2H), 2.48 (s, 2H), 2.31 (s, 3H), 1.07 (s, 6H). **13C NMR**: 197.94, 160.53, 150.16, 146.44, 137.16, 135.53, 134.84, 129.94, 129.70, 128.20, 127.98, 127.76, 127.73, 127.47, 127.13, 123.15, 116.65, 54.16, 48.16, 32.27, 28.32, 21.58. **DEPT-135**: Positive peak: 129.94, 129.70, 128.20, 127.98, 127.73, 127.47, 126.13, 116.65, 28.32, 21.58. Negative peak: 54.17, 48.16. **HRMS** (ESI) m/z [M+H]+ Calculated Exact Mass for Chemical Formula: C28H27N2O3S is 471.1742. Obtained Mass is 471.1745.

N-(6,6-dimethyl-8-oxo-9-phenyl-5,6,7,8-tetrahydroacridin-2-yl)-4-methoxybenzene sulfonamide **(6b)**

A mixture of 7-Amino-3,3-dimethyl-9-phenyl-3,4-dihydroacridin-1(2*H*)-one (250 mg, 0.7907 mmol), 4-methylbenzenesulfonyl chloride (244 mg, 1.1845 mmol), and pyridine (0.18 mL, 2.3640 mmol) was stirred in 10 mL of dichloromethane (DCM) at reflux for 30 minutes. The compound was then isolated by silica gel chromatography (60/120 mesh) using a 50% ethyl acetate/hexane mixture. Thin-layer chromatography (TLC) showed an Rf value of **0.5** (ethyl acetate/hexane, 4:6) under UV light after staining with H2SO4 and KMnO4. The melting point was between 126 °C and 131 °C. **1H NMR:** 400 MHz, CDCl3: δ 8.29 (d, J = 8.00 Hz, 1H), 7.64 (d, J = 8.40 Hz, 1H), 7.51 (s, 3H), 7.44 (d, J = 8.80 Hz, 2H), 7.02 (s, 3H), 6.73 (d, J = 8.40 Hz, 2H), 3.74 (s, 3H), 3.48 (s, 2H), 2.53 (s, 2H), 1.08 (s, 6H). **13C NMR:** 197.93, 163.24, 160.55, 137.18, 134.85, 129.97, 129.90, 129.65, 128.22, 128.00, 127.73, 126.26, 123.14, 116.76, 114.24, 55.63, 54.17, 48.19, 32.28, 28.33. **DEPT-135:** Positive peak: 133.20, 129.52, 129.11, 128.27, 127.94, 127.81, 127.41, 126.32, 116.48, 28.31. Negative peak: 54.11, 47.80. **HRMS** (ESI) m/z [M+H]+ Calculated Exact Mass for Chemical Formula: C28H27N2O4S is 487.1691. Obtained Mass is 487.1693.

N-(6,6-dimethyl-8-oxo-9-phenyl-5,6,7,8-tetrahydroacridin-2-yl) benzenesulfonamide (**6c)**

A mixture of 7-Amino-3,3-dimethyl-9-phenyl-3,4-dihydroacridin-1(2*H*)-one (250 mg, 0.7907 mmol), 4-methylbenzenesulfonyl chloride (208 mg, 1.1820 mmol), and pyridine (0.18 mL, 2.3640 mmol) was stirred in 10 mL of dichloromethane (DCM) at reflux for 30 minutes. The compound was then isolated using silica gel chromatography (60/120 mesh) with a **40%** ethyl acetate in hexane mixture. Thin-layer chromatography (TLC) showed an Rf value of **0.4** (ethyl acetate/hexane, 4:6) under UV light after staining with H2SO4 and KMnO4. The melting point was between 125 °C and 129 °C. **1H NMR:** 400 MHz, CDCl3: δ 7.92 (d, J = 8.80 Hz, 1H), 7.53 (d, J = 7.60 Hz, 2H), 7.47-7.45 (m, 5H), 7.31 (t, J = 8.00 Hz, 2H), 6.96 (d, J = 2.00 Hz, 2H), 6.94 (dd, J = 3.60, 7.40 Hz, 1H), 3.18 (s, 2H), 2.47 (s, 2H), 1.06 (s, 6H). **13C NMR:** 197.98, 160.62, 150.18, 146.47, 138.49, 137.14, 134.69, 133.19, 129.97, 128.24, 127.96, 127.76, 127.72, 127.40, 126.16, 123.17, 116.76, 54.15, 48.15, 32.28, 28.32. **DEPT-135:** Positive peak: 133.20, 129.52, 129.11, 128.27, 127.94, 127.81, 126.32, 116.48, 28.31. Negative peak: 54.11, 47.80. **HRMS** (ESI) m/z [M+H]+Calculated Exact Mass for Chemical Formula: C27H25N2O3S is 457.1585. Obtained Mass is 457.1587.

N-(6,6-dimethyl-8-oxo-9-phenyl-5,6,7,8-tetrahydroacridin-2-yl) naphthalene-2-sulfonamide **(6d)**

A mixture of 7-Amino-3,3-dimethyl-9-phenyl-3,4-dihydroacridin-1(2**H**)-one (250 mg, 0.7907 mmol), 4-methylbenzenesulfonyl chloride (268 mg, 1.1858 mmol), and pyridine (0.18 mL, 2.3640 mmol) was stirred in 10 mL of dichloromethane (DCM) at reflux for 30 minutes. The compound was then isolated using silica gel chromatography (60/120 mesh) with a **45%** ethyl acetate in hexane mixture. Thin-layer chromatography (TLC) showed an Rf value of **0.45** (ethyl acetate/hexane, 4:6) under UV light after staining with H2SO4 and KMnO4. The melting point was between 128 °C and 132 °C. **1H NMR**: 400 MHz, CDCl3: δ 8.12 (d, J = 2.00 Hz, 1H), 7.84 (dd, J = 8.80, 32.20 Hz, 1H), 7.76 (t, J = 7.20 Hz, 3H), 7.60-7.58 (m, 4H), 7.33 (t, J = 7.20 Hz, 1H), 7.24 (d, J = 7.60 Hz, 2H), 7.22 (s, 1H), 6.83 (dd, J = 2.00, 2H), 3.12 (s, 2H), 2.44 (s, 2H), 1.04 (s, 6H). **13C NMR**: 197.88, 160.72, 136.94, 135.24, 134.99, 134.60, 131.93, 130.02, 129.49, 129.35, 129.19, 128.11, 127.91, 127.82, 127.67, 126.75, 123.10, 122.17, 117.66, 54.13, 48.13, 32.25, 28.31. **DEPT-135**: Positive peak: 130.03, 129.50, 129.35, 129.19, 129.10, 128.12, 127.92, 127.82, 127.67, 122.17, 117.66, 28.31. Negative peak: 54.13, 48.15. **HRMS** (ESI) m/z [M+H]+ Calculated Exact Mass for Chemical Formula: C31H27N2O3S is 507.1742. Obtained Mass is 507.1743.

N-(6,6-dimethyl-8-oxo-9-phenyl-5,6,7,8-tetrahydroacridin-2-yl)-2,4,6-triisopropylbenzenesulfonamide **(6e)**

A mixture of 7-Amino-3,3-dimethyl-9-phenyl-3,4-dihydroacridin-1(2**H**)-one (250 mg, 0.7907 mmol), 4-methylbenzenesulfonyl chloride (225 mg, 1.1842 mmol), and pyridine (0.18 mL, 2.3640 mmol) was stirred in 10 mL of dichloromethane (DCM) at reflux for 30 minutes. The compound was then isolated using silica gel chromatography (60/120 mesh) with a **40%** ethyl acetate in hexane mixture. Thin-layer chromatography (TLC) showed an Rf value of **0.4** (ethyl acetate/hexane, 4:6) under UV light after staining with H2SO4 and KMnO4. The melting point was between **130°C and 135°C**.

4-chloro-N-(6,6-dimethyl-8-oxo-9-phenyl-5,6,7,8-tetrahydroacridin-2-yl) benzenesulfonamide **(6f)**

A mixture of 7-Amino-3,3-dimethyl-9-phenyl-3,4-dihydroacridin-1(2**H**)-one (250 mg, 0.7907 mmol), 4-methyl benzene sulfonyl chloride (248 mg, 1.1813 mmol), and pyridine (0.18 mL, 2.3640 mmol) was stirred in 10 mL of dichloromethane (DCM) at reflux for 30 minutes. The compound was then isolated using silica gel chromatography (60/120 mesh) with a **50%** ethyl acetate in hexane mixture. Thin-layer chromatography (TLC) showed an Rf value of **0.5** (ethyl acetate/hexane, 4:6) under UV light after staining with H2SO4 and KMnO4. The melting point was between 121 °C and 125 °C. **1H NMR:** 400 MHz, CDCl3: δ 7.91 (d, J = 9.20 Hz, 1H), 7.45-7.43 (m, 6H), 7.27 (d, J = 8.80 Hz, 2H), 6.95 (dd, J = 2.40, 4.00 Hz, 2H), 6.89 (d, J = 16.60 Hz, 1H), 3.16 (s, 2H), 2.48 (s, 2H), 1.07 (s, 6H). **13C NMR:** 197.85, 160.93, 139.81, 137.08, 136.90, 134.23, 130.18, 129.42, 128.85, 128.26, 127.91, 127.79, 127.74, 126.56, 123.21, 117.54, 54.13, 48.19, 32.27, 28.32. **DEPT-135:** Positive peak: 130.18, 129.42, 128.85, 128.26, 127.91, 127.79, 126.56, 117.53, 28.33. Negative peak: 54.14, 48.19. **HRMS** (ESI) m/z [M+H]+ Calculated Exact Mass for Chemical Formula: C27H24ClN2O3S is 491.1196. Obtained Mass is 491.1198.

4-bromo-N-(6,6-dimethyl-8-oxo-9-phenyl-5,6,7,8-tetrahydroacridin-2-yl) benzenesulfonamide **(6g)**

A mixture of 7-Amino-3,3-dimethyl-9-phenyl-3,4-dihydroacridin-1(2*H*)-one (250 mg, 0.7907 mmol), 4-methylbenzenesulfonyl chloride (301 mg, 1.1855 mmol), and pyridine (0.18 mL, 2.3640 mmol) was stirred in 10 mL of dichloromethane (DCM) at reflux for 30 minutes. The compound was then isolated using silica gel chromatography (60/120 mesh) with a **40%** ethyl acetate in hexane mixture. Thin-layer chromatography (TLC) showed an Rf value of **0.4** (ethyl acetate/hexane, 4:6) under UV light after staining with H2SO4 and KMnO4. The melting point was between 123 °C and 127 °C. **1H NMR:** 400 MHz, CDCl3: δ 7.91 (d, J = 9.20 Hz, 1H), 7.45-7.43 (m, 6H), 7.27 (d, J = 8.80 Hz, 2H), 6.95 (dd, J = 2.40, 4.00 Hz, 2H), 6.89 (d, J = 18.60 Hz, 1H), 3.16 (s, 2H), 2.48 (s, 2H), 1.07 (s, 6H). **13C NMR:** 197.85, 160.93, 139.81, 137.08, 136.90, 134.23, 130.18, 129.42, 128.85, 128.26, 127.91, 127.79, 127.74, 126.56, 123.21, 117.54, 54.13, 48.19, 32.27, 28.32. **DEPT-135:** Positive peak: 130.18, 129.42, 128.85, 128.26, 127.79, 126.56, 117.53, 28.33. Negative peak: 54.14, 48.19. **HRMS** (ESI) m/z [M+H]+ Calculated Exact Mass for Chemical Formula: C27H24BrN2O3S is 535.0691. Obtained Mass is 535.0693.

N-(6,6-dimethyl-8-oxo-9-phenyl-5,6,7,8-tetrahydroacridin-2-yl)-2-nitrobenzenesulfonamide **(6h)**

A mixture of 7-Amino-3,3-dimethyl-9-phenyl-3,4-dihydroacridin-1(2**H**)-one (250 mg, 0.7907 mmol), 4-methylbenzenesulfonyl chloride (262 mg, 1.1909 mmol), and pyridine (0.18 mL, 2.3640 mmol) was stirred in 10 mL of dichloromethane (DCM) at reflux for 30 minutes. The compound was then isolated using silica gel chromatography (60/120 mesh) with a **55%** ethyl acetate in hexane mixture. Thin-layer chromatography (TLC) showed an Rf value of **0.55** (ethyl acetate/hexane, 4:6) under UV light after staining with H2SO4 and KMnO4. The melting point was between 130 °C and 135 °C. **1H NMR:** 400 MHz, CDCl3: δ 7.93 (d, J = 2.00 Hz, 1H), 7.75 (dd, J = 0.80, 8.00 Hz, 1H), 7.60 (dt, J = 1.20, Hz, 1H), 7.55-7.55 (m, 2H), 7.48 (d, J = 0.80 Hz, 1H), 7.46-7.46 (m, 3H), 7.10 (d, J = 2.40 Hz, 1H), 6.95-6.95 (m, 2H), 3.17 (s, 2H), 2.48 (s, 2H), 1.07 (s, 6H). **13C NMR:** 197.78, 161.28, 136.94, 134.12, 133.75, 132.60, 131.93, 131.87, 130.22, 128.26, 127.90, 127.71, 127.50, 125.43, 123.23, 119.46, 54.14, 48.23, 32.29, 28.32. **DEPT-135:** Positive peak: 134.12, 132.60, 131.92, 130.04, 128.27, 127.95, 127.89, 127.55, 125.43, 119.36, 28.31. Negative peak: 54.13, 48.06. **HRMS** (ESI) m/z [M+H]+Calculated Exact Mass for Chemical Formula: C29H26N2O3 is 450.2021. Obtained Mass is 451.2021. HRMS (ESI) m/z [M+H]+ Calculated Exact Mass for Chemical Formula: C27H24N3O5S is 502.1436. Obtained Mass is 502.1437.

N-(6,6-dimethyl-8-oxo-9-phenyl-5,6,7,8-tetrahydroacridin-2-yl)-4-iodobenzenesulfonamide **(6i)**

A mixture of 7-Amino-3,3-dimethyl-9-phenyl-3,4-dihydroacridin-1(2*H*)-one (250 mg, 0.7907 mmol), 4-methylbenzenesulfonyl chloride (358 mg, 1.1859 mmol), and pyridine (0.18 mL, 2.3640 mmol) was stirred in 10 mL of dichloromethane (DCM) at reflux for 30 minutes. The compound was then isolated using silica gel chromatography (60/120 mesh) with a **40%** ethyl acetate in hexane mixture. Thin-layer chromatography (TLC) showed an Rf value of **0.4** (ethyl acetate/hexane, 4:6) under UV light after staining with H2SO4 and KMnO4. The melting point was between 138 °C and 141 °C. **1H NMR:** 400 MHz, CDCl3: δ 7.99 (d, J = 8.80 Hz, 1H), 7.64 (d, J = 8.40 Hz, 2H), 7.45 (t, J = 2.80 Hz, 4H), 7.22-7.20 (m, 1H), 6.97 (d, J = 2.40 Hz, 1H), 6.95 (d, J = 3.20 Hz, 2H), 6.88 (s, 1H), 3.22 (s, 2H), 2.49 (s, 2H), 1.07 (s, 6H). **13C NMR:** 197.66, 160.66, 150.74, 138.36, 138.10, 136.94, 134.59, 129.63, 128.72, 128.31, 127.88, 127.84, 126.68, 123.26, 117.06, 100.88, 54.09, 47.79, 32.31, 28.32. **DEPT-135:** Positive peak: 138.37, 129.62, 128.72, 128.31, 127.88, 126.68, 117.05, 28.32. Negative peak: 54.09, 47.78. HRMS (ESI) m/z [M+H]+ Calculated Exact Mass for Chemical Formula: C29H26N2O3 is 450.2021. Obtained Mass is 451.2021. **HRMS** (ESI) m/z [M+H]+Calculated Exact Mass for Chemical Formula: C27H24IN2O3S is 583.0552. Obtained Mass is 583.0551.

4-cyano-N-(6,6-dimethyl-8-oxo-9-phenyl-5,6,7,8-tetrahydroacridin-2-yl) benzene sulfonamide **(6j)**

A mixture of 7-Amino-3,3-dimethyl-9-phenyl-3,4-dihydroacridin-1(2*H*)-one (250 mg, 0.7907 mmol), 4-methylbenzenesulfonyl chloride (238 mg, 1.1842 mmol), and pyridine (0.18 mL, 2.3640 mmol) was stirred in 10 mL of dichloromethane (DCM) at reflux for 30 minutes. The compound was then isolated using silica gel chromatography (60/120 mesh) with a **60%** ethyl acetate in hexane mixture. Thin-layer chromatography (TLC) showed an Rf value of **0.6** (ethyl acetate/hexane, 4:6) under UV light after staining with H2SO4 and KMnO4. The melting point was between 131 °C and 136 °C. **1H NMR:** 400 MHz, CDCl3: δ 8.04 (d, J = 8.80 Hz, 1H), 7.63 (d, J = 8.40 Hz, 2H), 7.59-7.57 (m, 2H), 7.52-7.50 (m, 4H), 6.98 (t, J = 4.80 Hz, 2H), 6.91 (d, J = 1.20 Hz, 1H), 3.24 (s, 2H), 2.50 (s, 2H), 1.08 (s, 6H). **13C NMR:** 197.66, 142.72, 136.86, 132.88, 128.34, 128.03, 127.98, 127.87, 126.59, 123.38, 117.33, 117.05, 117.90, 54.06, 47.76, 32.32, 28.30. **DEPT-135:** Positive peak: 138.37, 129.62, 128.72, 128.31, 127.88, 126.68, 117.05, 28.32. Negative peak: 54.09, 47.78. HRMS (ESI) m/z [M+H]+ Calculated Exact Mass for Chemical Formula: C29H26N2O3 is 450.2021. Obtained Mass is 451.2021. **HRMS** (ESI) m/z [M+H]+ Calculated Exact Mass for Chemical Formula: C28H24N3O3S is 482.1538. Obtained Mass is 482.1537.

**3. Synthesis Procedure for substrate scope (10a-10j)**

4-methyl-N-(8-oxo-9-phenyl-5,6,7,8-tetrahydroacridin-2-yl) benzenesulfonamide **(10a)**

A mixture of 7-amino-9-phenyl-3,4-dihydroacridin-1(2*H*)-one (250 mg, 0.8680 mmol), 4-methylbenzenesulfonyl chloride (247 mg, 1.300 mmol), and pyridine (0.2 mL, 2.5916 mmol) was stirred in 10 mL of dichloromethane (DCM) at reflux for 30 minutes. The compound was then isolated using silica gel chromatography (60/120 mesh) with a **40%** ethyl acetate in hexane mixture. Thin-layer chromatography (TLC) showed an Rf value of **0.4** (ethyl acetate/hexane, 4:6) under UV light after staining with H2SO4 and KMnO4. The melting point was between 123 °C and 128 °C. **1H NMR:** 400 MHz, CDCl3: δ 7.89 (d, J = 8.80 Hz, 1H), 7.47 (d, J = 2.40 Hz, 1H), 7.45-7.44 (m, 5H), 7.09 (d, J = 8.00 Hz, 2H), 6.95 (t, J = 3.60 Hz, 2H), 6.89 (d, J = 2.00 Hz, 1H), 3.26 (t, J = 6.40 Hz, 2H), 2.61 (t, J = 6.40 Hz, 2H), 2.31 (s, 3H), 2.18-2.16 (m, 2H). **13C NMR:** 197.86, 161.06, 144.09, 137.18, 135.47, 134.85, 129.85, 129.68, 128.19, 127.94, 127.84, 127.77, 127.46, 126.34, 124.28, 116.71, 40.58, 30.95, 21.58, 21.31. **DEPT-135:** Positive peak: 129.85, 129.69, 128.19, 127.94, 127.77, 126.34, 116.70, 30.96, 21.31. Negative peak: 40.58, 34.33. HRMS (ESI) m/z [M+H]+ Calculated Exact Mass for Chemical Formula: C29H26N2O3 is 450.2021. Obtained Mass is 451.2021. **HRMS** (ESI) m/z [M+H]+ Calculated Exact Mass for Chemical Formula: C26H23N2O3S is 443.1429. Obtained Mass is 443.1429.

4-methoxy-N-(8-oxo-9-phenyl-5,6,7,8-tetrahydroacridin-2-yl) benzenesulfonamide **(10b)**

A mixture of 7-amino-9-phenyl-3,4-dihydroacridin-1(2*H*)-one (250 mg, 0.8680 mmol), 4-methylbenzenesulfonyl chloride (268 mg, 1.3010 mmol), and pyridine (0.2 mL, 2.5916 mmol) was stirred in 10 mL of dichloromethane (DCM) at reflux for 30 minutes. The compound was then isolated using silica gel chromatography (60/120 mesh) with a **60%** ethyl acetate in hexane mixture. Thin-layer chromatography (TLC) showed an Rf value of **0.6** (ethyl acetate/hexane, 4:6) under UV light after staining with H2SO4 and KMnO4. The melting point was between 134 °C and 139 °C. **1H NMR:** 400 MHz, CDCl3: δ 8.00 (d, J = 8.80 Hz, 1H), 7.50-7.50 (m, 6H), 6.97 (t, J = 4.00 Hz, 2H), 6.91 (d, J = 2.00 Hz, 1H), 6.74 (d, J = 8.80 Hz, 2H), 3.75 (s, 3H), 3.34 (t, J = 6.00 Hz, 2H), 2.62 (t, J = 6.40 Hz, 2H), 2.18-2.16 (m, 2H). **13C NMR:** 197.80, 163.23, 161.46, 161.46, 150.91, 137.15, 135.10, 129.85, 129.65, 128.21, 127.95, 127.90, 127.79, 126.48, 124.29, 116.37, 114.22, 55.63, 40.55, 34.14, 21.27. **DEPT-135:** Positive peak: 129.65, 129.55, 128.21, 127.95, 127.80, 126.48, 116.37, 114.22, 55.63, 21.28. Negative peak: 40.55, 34.14. **HRMS** (ESI) m/z [M+H]+ Calculated Exact Mass for Chemical Formula: C29H26N2O3 is 459.1378. Obtained Mass is 459.1380.

N-(8-oxo-9-phenyl-5,6,7,8-tetrahydroacridin-2-yl) benzenesulfonamide **(10c)**

A mixture of 7-amino-9-phenyl-3,4-dihydroacridin-1(2*H*)-one (250 mg, 0.8680 mmol), 4-methylbenzenesulfonyl chloride (229 mg, 1.3013 mmol), and pyridine (0.2 mL, 2.5916 mmol) was stirred in 10 mL of dichloromethane (DCM) at reflux for 30 minutes. The compound was then isolated using silica gel chromatography (60/120 mesh) with a **40%** ethyl acetate in hexane mixture. Thin-layer chromatography (TLC) showed an Rf value of **0.4** (ethyl acetate/hexane, 4:6) under UV light after staining with H2SO4 and KMnO4. The melting point was between **121 °C and 125 °C**. **1H NMR:** 400 MHz, CDCl3: δ 8.05 (d, J = 16.80 Hz, 1H), 7.51 (d, J = 7.20 Hz, 3H), 7.44 (s, 4H), 7.31-7.29 (m, 2H), 6.96 (d, J = 8.00 Hz, 3H), 3.36 (s, 2H), 2.62 (s, 2H), 2.16 (s, 2H). **13C NMR:** 197.62, 161.46, 138.42, 137.01, 135.00, 133.19, 129.32, 129.09, 128.26, 127.89, 127.85, 127.41, 126.7, 124.34, 116.39, 40.51, 33.96, 21.22. **DEPT-135:** Positive peak: 133.20, 129.32, 129.10, 128.26, 127.89, 127.85, 127.41, 126.57, 116.39. Negative peak: 40.51, 33.97, 21.22. HRMS (ESI) m/z [M+H]+ Calculated Exact Mass for Chemical Formula: C29H26N2O3 is 450.2021. Obtained Mass is 451.2021. **HRMS** (ESI) m/z [M+H]+ Calculated Exact Mass for Chemical Formula: C25H21N2O3S is 429.1272. Obtained Mass is 429.1275.

N-(8-oxo-9-phenyl-5,6,7,8-tetrahydroacridin-2-yl) naphthalene-2-sulfonamide **(10d)**

A mixture of 7-amino-9-phenyl-3,4-dihydroacridin-1(2*H*)-one (250 mg, 0.8680 mmol), 4-methylbenzenesulfonyl chloride (294 mg, 1.300 mmol), and pyridine (0.2 mL, 2.5916 mmol) was stirred in 10 mL of dichloromethane (DCM) at reflux for 30 minutes. The compound was then isolated using silica gel chromatography (60/120 mesh) with a **60%** ethyl acetate in hexane mixture. Thin-layer chromatography (TLC) showed an Rf value of **0.6** (ethyl acetate/hexane, 4:6) under UV light after staining with H2SO4 and KMnO4. The melting point was between 138 °C and 142 °C. **1H NMR:** 400 MHz, CDCl3: δ 8.04 (d, J = 14.80 Hz, 1H), 7.88 (d, J = 15.20 Hz, 1H), 7.75 (t, J = 11.20 Hz, 3H), 7.59-7.57 (m, 4H), 7.38-7.36 (m, 1H), 7.28 (d, J = 7.60 Hz, 2H), 6.90 (d, J = 1.60 Hz, 1H), 6.81 (d, J = 7.60 Hz, 2H), 3.29 (t, J = 6.00 Hz, 2H), 2.59 (t, J = 6.40 Hz, 2H), 2.16-2.14 (m, 2H). **13C NMR:** 197.62, 161.46, 138.42, 137.01, 135.00, 133.19, 129.32, 128.26, 127.89, 127.85, 127.41, 126.57, 124.34, 116.39, 40.51, 33.96, 21.22. **DEPT-135:** Positive peak: 133.20, 129.32, 129.10, 128.26, 127.89, 127.85, 127.41, 126.41, 116.39. Negative peak: 40.51, 33.97. **HRMS** (ESI) m/z [M+H]+ Calculated Exact Mass for Chemical Formula: C29H23N2O3S is 479.1429. Obtained Mass is 479.1430.

2,4,6-triisopropyl-N-(8-oxo-9-phenyl-5,6,7,8-tetrahydroacridin-2-yl)benzenesulfonamide **(10e)**

A mixture of 7-amino-9-phenyl-3,4-dihydroacridin-1(2*H*)-one (250 mg, 0.8680 mmol), 4-methylbenzenesulfonyl chloride (247 mg, 1.300 mmol), and pyridine (0.2 mL, 2.5916 mmol) was stirred in 10 mL of dichloromethane (DCM) at reflux for 30 minutes. The compound was then isolated using silica gel chromatography (60/120 mesh) with a **30%** ethyl acetate in hexane mixture. Thin-layer chromatography (TLC) showed an Rf value of **0.3** (ethyl acetate/hexane, 4:6) under UV light after staining with H2SO4 and KMnO4. The melting point was between **130 °C and 135 °C**.

4-chloro-N-(8-oxo-9-phenyl-5,6,7,8-tetrahydroacridin-2-yl) benzenesulfonamide **(10f)**

A mixture of 7-amino-9-phenyl-3,4-dihydroacridin-1(2*H*)-one (250 mg, 0.8680 mmol), 4-methylbenzenesulfonyl chloride (273 mg, 1.300 mmol), and pyridine (0.2 mL, 2.5916 mmol) was stirred in 10 mL of dichloromethane (DCM) at reflux for 30 minutes. The compound was then isolated using silica gel chromatography (60/120 mesh) with a **50%** ethyl acetate in hexane mixture. Thin-layer chromatography (TLC) showed an Rf value of **0.5** (ethyl acetate/hexane, 4:6) under UV light after staining with H2SO4 and KMnO4. The melting point was between 132 °C and 135 °C. **1H NMR:** 400 MHz, CDCl3: δ 7.92 (d, J = 9.20 Hz, 2H), 7.45-7.45 (m, 6H), 7.24-7.22 (m, 2H), 6.96 (t, J = 2.00 Hz, 2H), 6.89 (d, J = 2.00 Hz, 1H), 3.28 (t, J = 6.00 Hz, 2H), 2.84 (t, J = 6.40 Hz, 2H). **13C NMR:** 207.47, 197.71, 161.56, 151.30, 145.16, 139.68, 137.02, 136.96, 134.94, 129.36, 129.28, 128.86, 128.23, 127.95, 127.86, 127.73, 126.73, 124.35, 116.44, 40.47, 33.89, 30.98. **DEPT-135:** Positive peak: 129.36, 129.28, 128.86, 128.23, 127.86, 126.86, 126.73, 116.43, 21.18. Negative peak: 40.47, 33.89, 29.70. **HRMS** (ESI) m/z [M+H]+ Calculated Exact Mass for Chemical Formula: C25H20ClN2O3S is 463.0883. Obtained Mass is 463.0886.

4-bromo-N-(8-oxo-9-phenyl-5,6,7,8-tetrahydroacridin-2-yl) benzenesulfonamide **(10g)**

A mixture of 7-amino-9-phenyl-3,4-dihydroacridin-1(2*H*)-one (250 mg, 0.8680 mmol), 4-methylbenzenesulfonyl chloride (330 mg, 1.2998 mmol), and pyridine (0.2 mL, 2.5916 mmol) was stirred in 10 mL of dichloromethane (DCM) at reflux for 30 minutes. The compound was then isolated using silica gel chromatography (60/120 mesh) with a **60%** ethyl acetate in hexane mixture. Thin-layer chromatography (TLC) showed an Rf value of **0.6** (ethyl acetate/hexane, 4:6) under UV light after staining with H2SO4 and KMnO4. The melting point was between 113 °C and 125 °C. **1H NMR:** 400 MHz, CDCl3: δ 7.95 (d, J = 8.80 Hz, 1H), 7.63-7.61 (m, 4H), 7.45-7.44 (m, 4H), 6.97 (d, J = 3.60 Hz, 2H), 6.90 (d, J = 18.40 Hz, 1H), 3.28 (t, J = 6.00 Hz, 2H), 2.63 (t, J = 6.40 Hz, 2H), 2.19-2.18 (m, 2H). **13C NMR:** 137.37, 132.39, 128.91, 128.29, 127.83, 127.01, 117.18, 60.44, 40.49, 21.08. **DEPT-135:** Positive peak: 132.39, 128.91, 128.29, 127.94, 127.83, 127.01, 117.17. Negative peak: 60.45, 40.49, 21.19. **HRMS** (ESI) m/z [M+H]+ Calculated Exact Mass for Chemical Formula: C25H20BrN2O3S is 507.0378. Obtained Mass is 507.0375.

2-nitro-N-(8-oxo-9-phenyl-5,6,7,8-tetrahydroacridin-2-yl) benzenesulfonamide **(10h)**

A mixture of 7-amino-9-phenyl-3,4-dihydroacridin-1(2*H*)-one (250 mg, 0.8680 mmol), 4-methylbenzenesulfonyl chloride (287 mg, 1.2989 mmol), and pyridine (0.2 mL, 2.5916 mmol) was stirred in 10 mL of dichloromethane (DCM) at reflux for 30 minutes. The compound was then isolated using silica gel chromatography (60/120 mesh) with a **50%** ethyl acetate in hexane mixture. Thin-layer chromatography (TLC) showed an Rf value of **0.5** (ethyl acetate/hexane, 4:6) under UV light after staining with H2SO4 and KMnO4. The melting point was between **131 °C and 136 °C**.

4-iodo-N-(8-oxo-9-phenyl-5,6,7,8-tetrahydroacridin-2-yl) benzenesulfonamide **(10i)**

A mixture of 7-amino-9-phenyl-3,4-dihydroacridin-1(2*H*)-one (250 mg, 0.8680 mmol), 4-methylbenzenesulfonyl chloride (393 mg, 1.3018 mmol), and pyridine (0.2 mL, 2.5916 mmol) was stirred in 10 mL of dichloromethane (DCM) at reflux for 30 minutes. The compound was then isolated using silica gel chromatography (60/120 mesh) with a **40%** ethyl acetate in hexane mixture. Thin-layer chromatography (TLC) showed an Rf value of **0.4** (ethyl acetate/hexane, 4:6) under UV light after staining with H2SO4 and KMnO4. The melting point was between 122 °C and 128 °C. **1H NMR:** 400 MHz, CDCl3: δ 7.97 (d, J = 9.20 Hz, 1H), 7.64 (d, J = 8.00 Hz, 2H), 7.50 (d, J = 2.00 Hz, 1H), 7.48-7.48 (m, 3H), 7.21-7.19 (m, 2H), 6.96 (t, J = 2.00 Hz, 2H), 6.84 (d, J = 1.60 Hz, 1H), 3.32 (t, J = 6.00 Hz, 2H), 2.63 (t, J = 6.40 Hz, 2H), 2.20-2.18 (m, 2H). **13C NMR:** 197.07, 161.25, 138.33, 138.03, 136.70, 135.29, 128.75, 128.33, 128.11, 128.07, 127.78, 127.18, 124.44, 116.19, 100.89, 40.39, 33.33, 21.06. **DEPT-135:** Positive peak: 138.34, 129.31, 128.73, 128.31, 127.95, 127.82, 126.99, 117.00. Negative peak: 40.48, 33.89, 21.18. **HRMS** (ESI) m/z [M+H]+ Calculated Exact Mass for Chemical Formula: C25H20IN2O3S is 555.0239. Obtained Mass is 555.0241.

4-cyano-N-(8-oxo-9-phenyl-5,6,7,8-tetrahydroacridin-2-yl) benzenesulfonamide **(10j)**

A mixture of 7-amino-9-phenyl-3,4-dihydroacridin-1(2*H*)-one (250 mg, 0.8680 mmol), 4-methylbenzenesulfonyl chloride (261 mg, 1.2987 mmol), and pyridine (0.2 mL, 2.5916 mmol) was stirred in 10 mL of dichloromethane (DCM) at reflux for 30 minutes. The compound was then isolated using silica gel chromatography (60/120 mesh) with a **60%** ethyl acetate in hexane mixture. Thin-layer chromatography (TLC) showed an Rf value of **0.6** (ethyl acetate/hexane, 4:6) under UV light after staining with H2SO4 and KMnO4. The melting point was between 120 °C and 125 °C. **1H NMR:** 400 MHz, CDCl3: δ 7.95 (d, J = 8.80 Hz, 1H), 7.63-7.61 (m, 4H), 7.44 (d, J = 5.60 Hz, 4H), 6.97 (d, J = 3.60 Hz, 2H), 6.90 (d, J = 18.40 Hz, 1H), 3.28 (t, J = 6.00 Hz, 2H), 2.63 (t, J = 6.40 Hz, 2H), 2.19-2.18 (m, 2H). **13C NMR:** 197.33, 161.76, 142.72, 136.83, 134.54, 132.86, 129.21, 128.33, 128.04, 127.83, 126.79, 124.50, 117.07, 116.83, 116.67, 40.42, 33.70, 21.10. **DEPT-135:** Positive peak: 132.86, 129.97, 128.30, 128.02, 127.92, 126.57, 117.29. Negative peak: 40.50, 34.18, 21.21. **HRMS** (ESI) m/z [M+H]+ Calculated Exact Mass for Chemical Formula: C26H20N3O3S is 454.1225. Obtained Mass is 454.1227.

**4. DFT Calculation for Substrate Scope (6a-6j) & (10a-10j)**

DFT calculations were conducted at the B3LYP/6-31+G’ (d.p) level using the Gaussian 09 software package. The results were compared among compounds 6a-6j and 10a-10j. **Table 1** shows the HOMO and LUMO energy differences ΔE **(eV)**, Ionization Potential **(IP)**, Electron Affinity **(EA)**, Electronegativity **(χ)**, Chemical Potential **(μ)**, Chemical Hardness **(η)**, Softness **(S)**, and Global Electrophilicity Index **(ω- and ω+)**. Compounds 6b, 6c, 6d, and 6j within the 6a-6j series form a cluster with the most significant energy gaps (~3.65 eV), indicating they are the most electronically stable and least reactive. Similarly, compounds 10a, 10b, and 10f in the 10a-10j series have the largest energy gaps, making them the least reactive and most stable in that series. Among compounds 6a-6j, 6i and 6a are the most electronically reactive due to their small energy gaps, which allow easier electron transfer or acceptance. Likewise, among compounds 10a-10j, 10h and 10e are the most reactive because of their small energy gaps.

**Table 1**

| **Cpd. no** | **HOMO** | **LUMO** | **ΔE** | **IP** | **EA** | **χ** | **μ** | **η** | **S** | **ω** | **ω-** | **ω+** |
| --- | --- | --- | --- | --- | --- | --- | --- | --- | --- | --- | --- | --- |
| **6a** | -4.365 | -3.631 | 0.734 | 4.365 | 3.631 | 3.998 | -3.998 | 0.367 | 2.723 | 21.772 | 23.817 | 19.818 |
| **6b** | -5.948 | -2.289 | 3.658 | 5.948 | 2.289 | 4.118 | -4.118 | 1.829 | 0.546 | 4.637 | 6.925 | 2.806 |
| **6c** | -5.964 | -2.31 | 3.653 | 5.964 | 2.31 | 4.137 | -4.137 | 1.826 | 0.547 | 4.686 | 6.983 | 2.845 |
| **6d** | -5.926 | -2.273 | 3.653 | 5.926 | 2.273 | 4.099 | -4.099 | 1.826 | 0.547 | 4.601 | 6.879 | 2.779 |
| **6e** | -5.305 | -2.038 | 3.267 | 5.305 | 2.038 | 3.672 | -3.672 | 1.633 | 0.612 | 4.127 | 6.167 | 2.495 |
| **6f** | -4.796 | -2.421 | 2.374 | 4.796 | 2.421 | 3.608 | -3.608 | 1.187 | 0.842 | 5.486 | 7.438 | 3.829 |
| **6g** | -4.646 | -3.682 | 0.963 | 4.646 | 3.682 | 4.164 | -4.164 | 0.481 | 2.074 | 17.994 | 20.13 | 15.972 |
| **6h** | -6.01 | -2.964 | 3.045 | 6.01 | 2.964 | 4.487 | -4.487 | 1.522 | 0.656 | 6.6117 | 9.045 | 4.558 |
| **6i** | -4.196 | -3.488 | 0.707 | 4.196 | 3.488 | 3.842 | -3.842 | 0.353 | 2.826 | 20.861 | 22.826 | 18.984 |
| **6j** | -6.115 | -2.481 | 3.634 | 6.115 | 2.481 | 4.298 | -4.298 | 1.817 | 0.55 | 5.083 | 7.46 | 3.161 |
| **10a** | -5.98 | -2.316 | 3.663 | 5.98 | 2.316 | 4.148 | -4.148 | 1.831 | 0.545 | 4.697 | 7.001 | 2.852 |
| **10b** | -5.964 | -2.311 | 3.653 | 5.964 | 2.311 | 4.137 | -4.137 | 1.826 | 0.547 | 4.686 | 6.983 | 2.846 |
| **10c** | -5.94 | -2.295 | 3.645 | 5.94 | 2.295 | 4.117 | -4.117 | 1.822 | 0.548 | 4.651 | 6.937 | 2.82 |
| **10d** | -5.937 | -2.292 | 3.645 | 5.937 | 2.292 | 4.114 | -4.114 | 1.822 | 0.548 | 4.645 | 6.93 | 2.815 |
| **10e** | -5.308 | -2.041 | 3.267 | 5.308 | 2.041 | 3.674 | -3.674 | 1.633 | 0.612 | 4.133 | 6.174 | 2.501 |
| **10f** | -6.164 | -2.405 | 3.758 | 6.164 | 2.405 | 4.284 | -4.284 | 1.879 | 0.532 | 4.885 | 7.262 | 2.977 |
| **10g** | -6.031 | -2.394 | 3.636 | 6.031 | 2.394 | 4.213 | -4.213 | 1.818 | 0.549 | 4.881 | 7.215 | 3.001 |
| **10h** | -6.199 | -3.361 | 2.837 | 6.199 | 3.361 | 4.78 | -4.78 | 1.418 | 0.704 | 8.052 | 10.62 | 5.84 |
| **10i** | -5.869 | -2.23 | 3.639 | 5.869 | 2.23 | 4.05 | -4.05 | 1.819 | 0.549 | 4.506 | 6.759 | 2.709 |
| **10j** | -5.969 | -2.5 | 3.469 | 5.969 | 2.5 | 4.234 | -4.234 | 1.734 | 0.576 | 5.169 | 7.503 | 3.268 |

**4.1 Global reactivity parameters**

From the optimized structures and FMO calculations, the molecular reactivity descriptors were determined. The table displays the molecular orbital energy levels and global reactivity descriptors of the titled 6a-6j and 10a-10j compounds.

ΔE = LUMO - HOMO (ev) **(1)**

A = -EHOMO (ev) **(2)**

Χ = (I + A)/ 2 (ev) **(3)**

μ = -χ (ev) **(4)**

η = (I - A)/ 2 (ev) **(5)**

S = 1/η (ev) **(6)**

ω = μ2/2η (ev) **(7)**

ω- = (3I - A)2/ 16(I - A) (ev) **(8)**

ω+ = (I + 3A)2/ 16(I - A) (ev) **(9)**


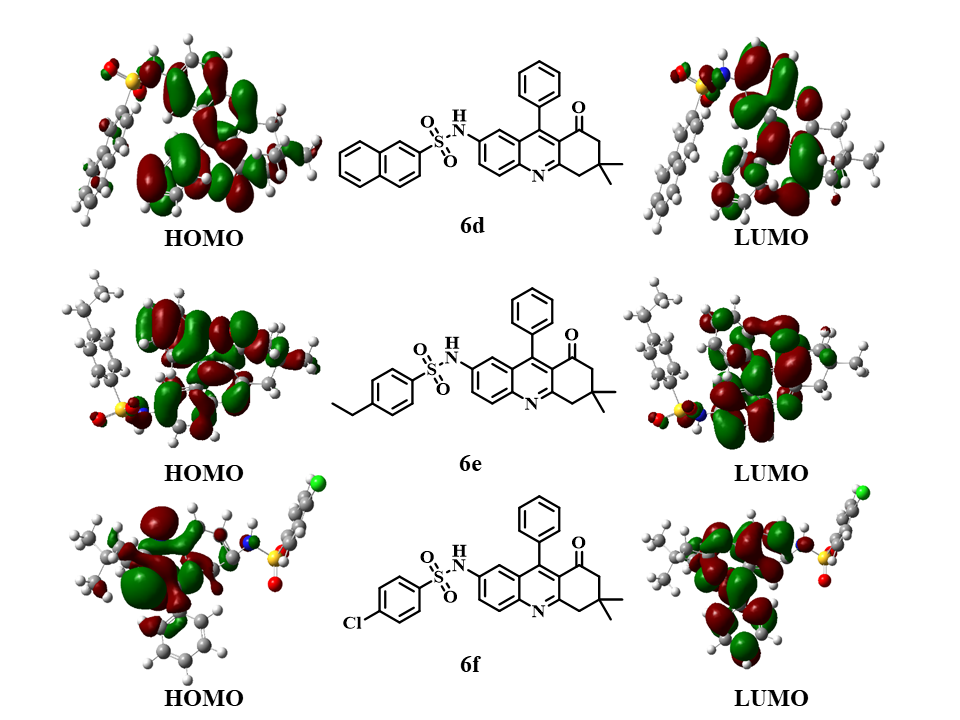

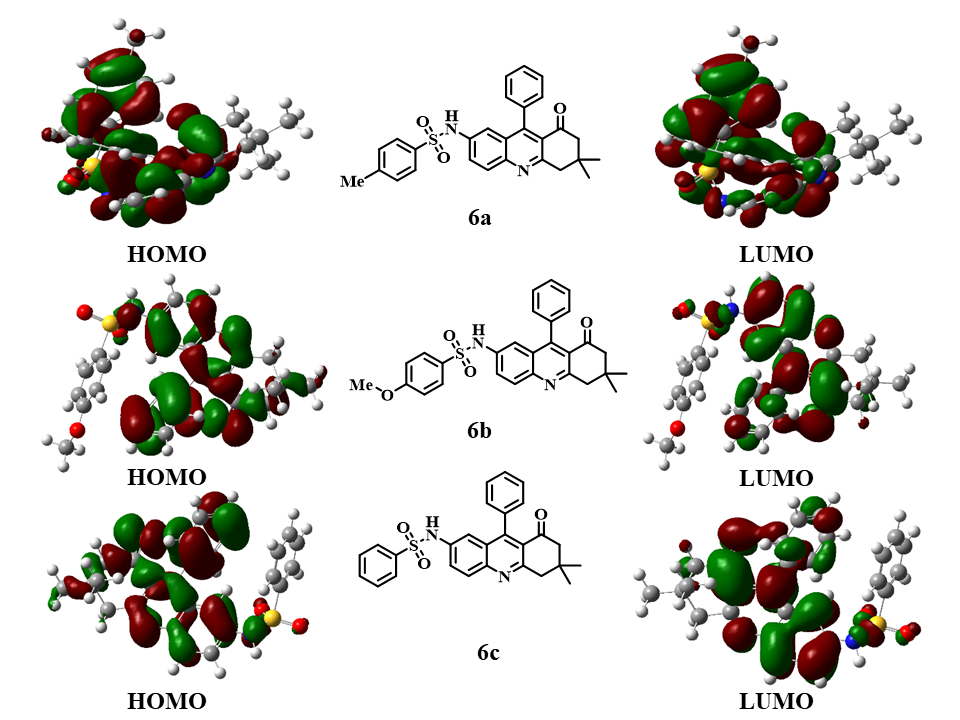


**Fig S1**


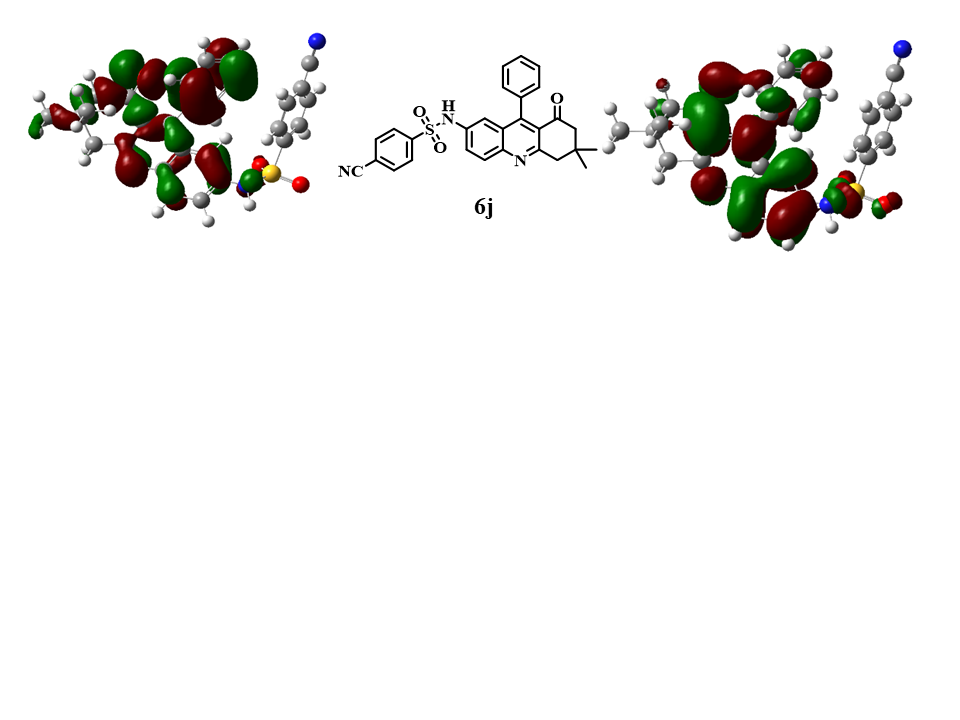

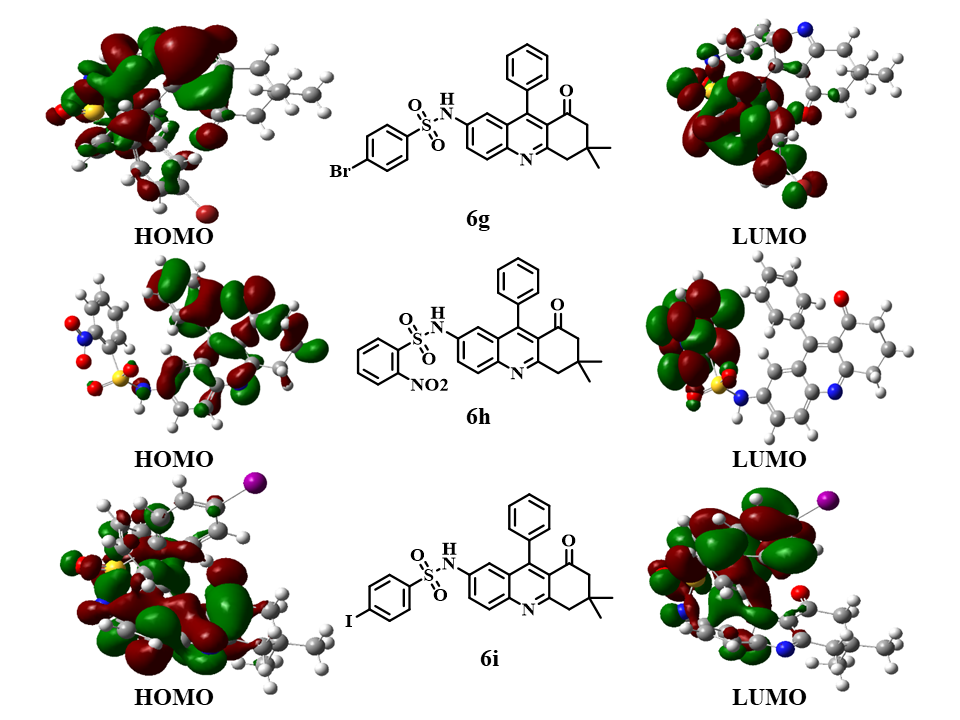


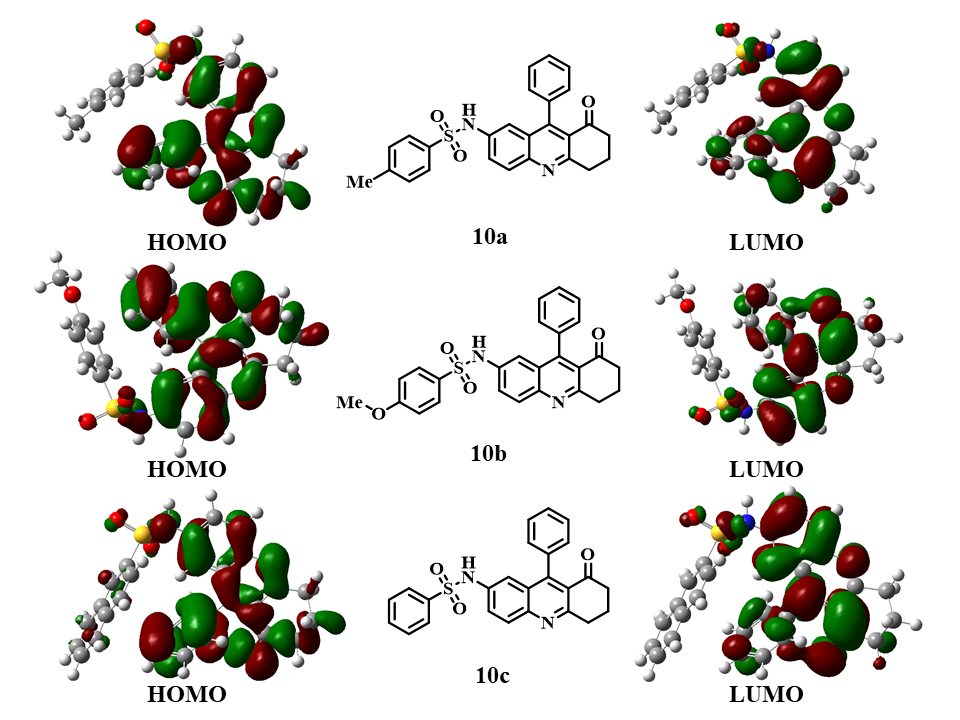


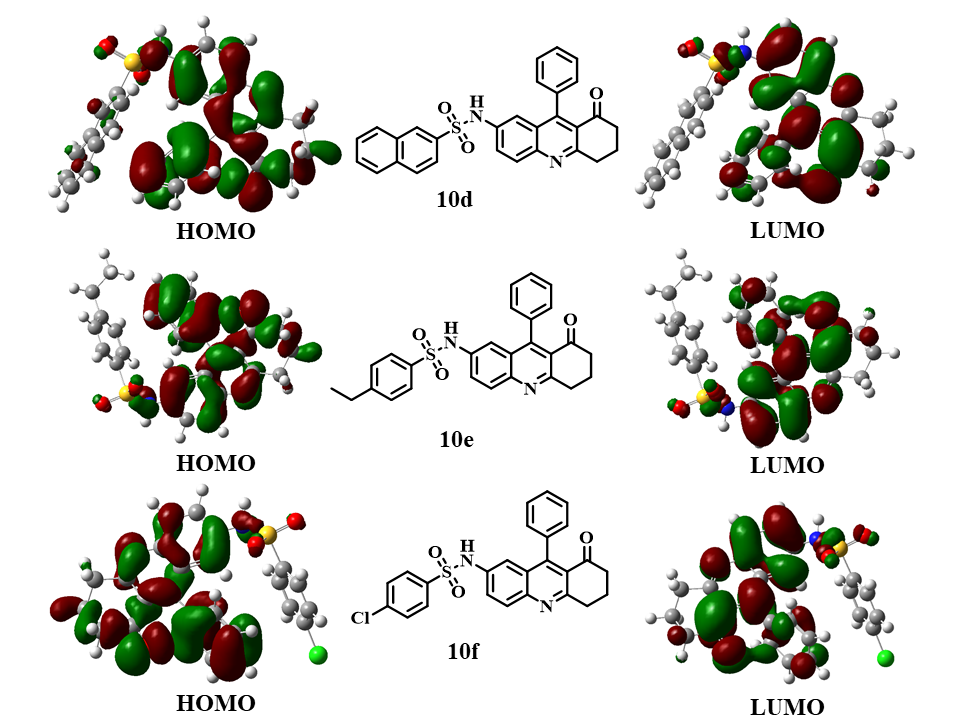


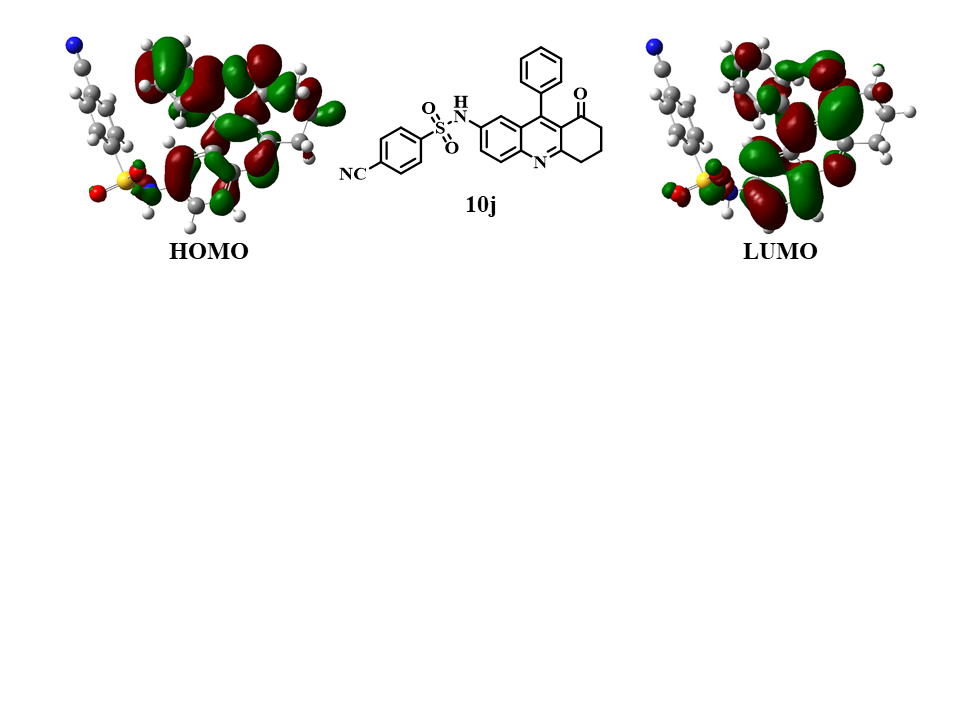

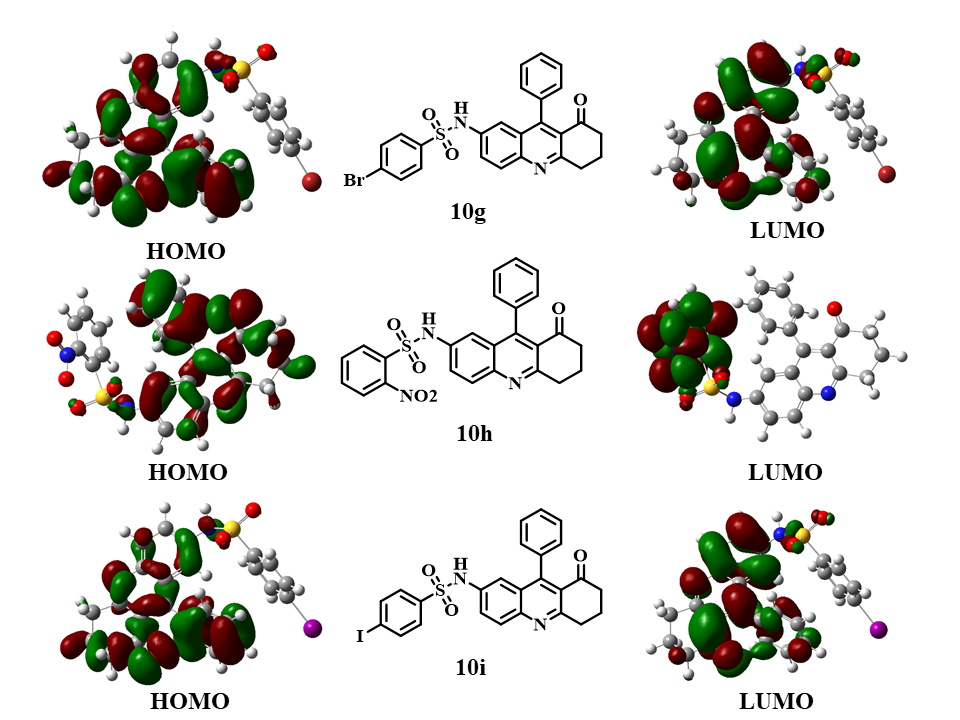


**
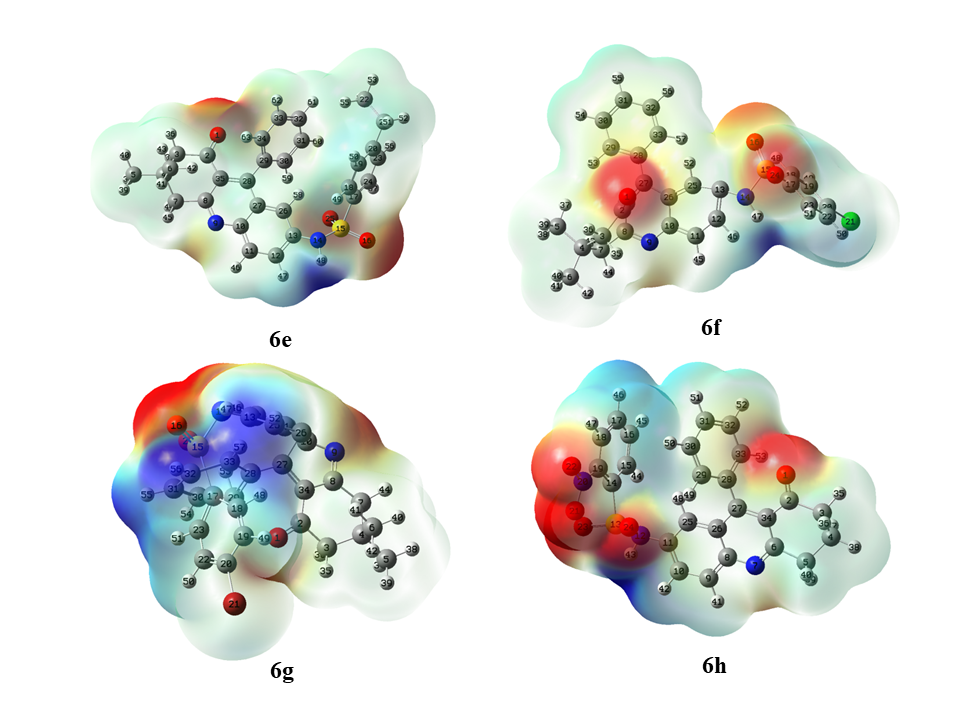

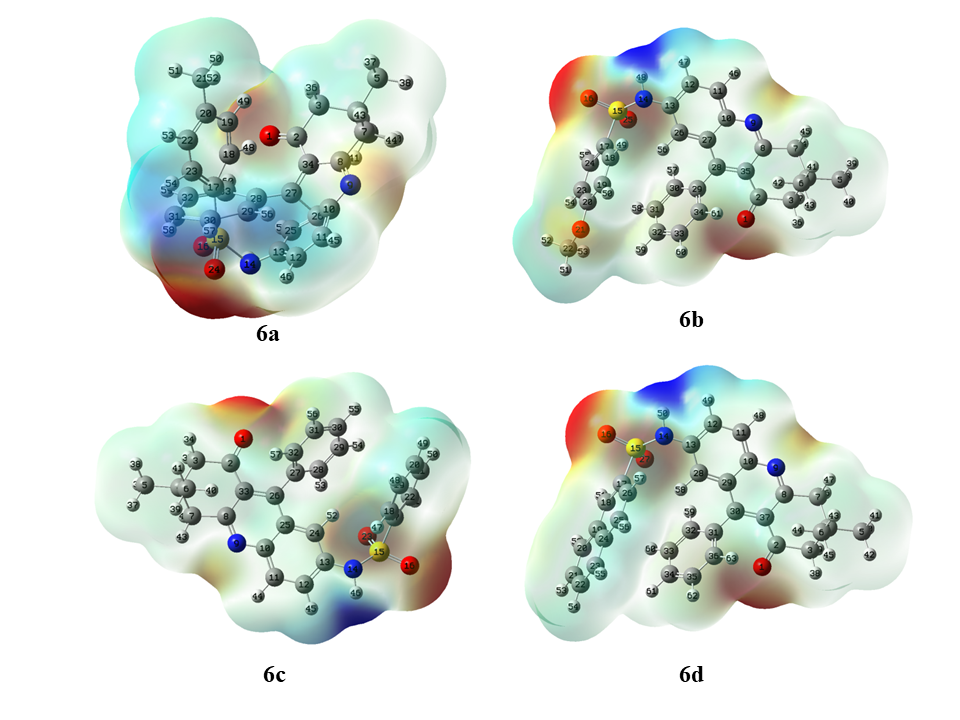
**

**Fig S2**

**MEP for compounds 6a-6j & 10a-10j**

**
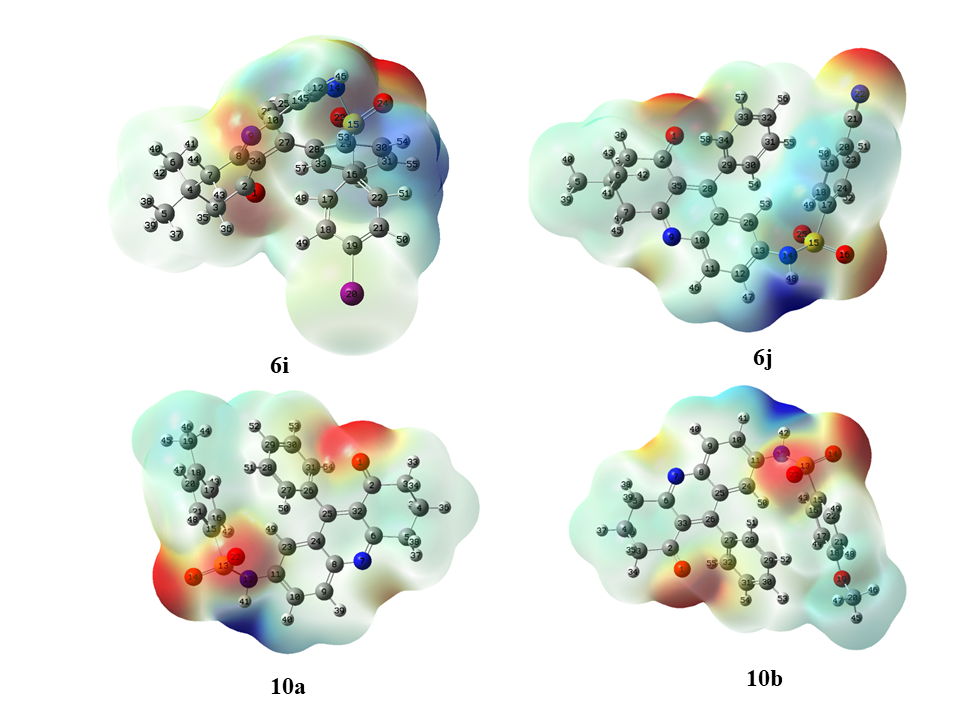
**

**
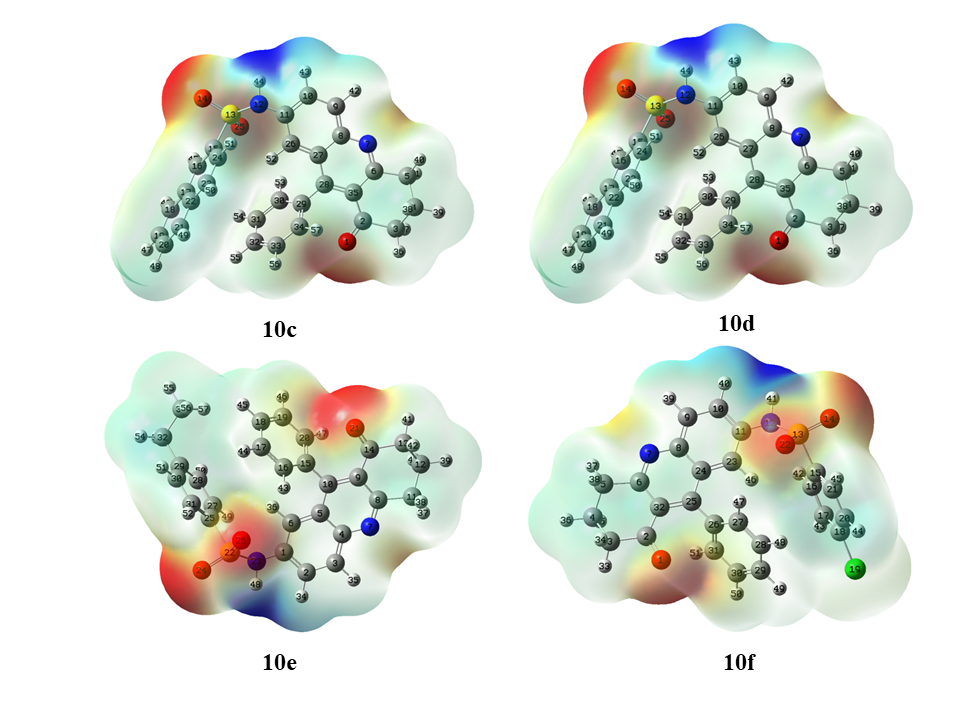
**

**
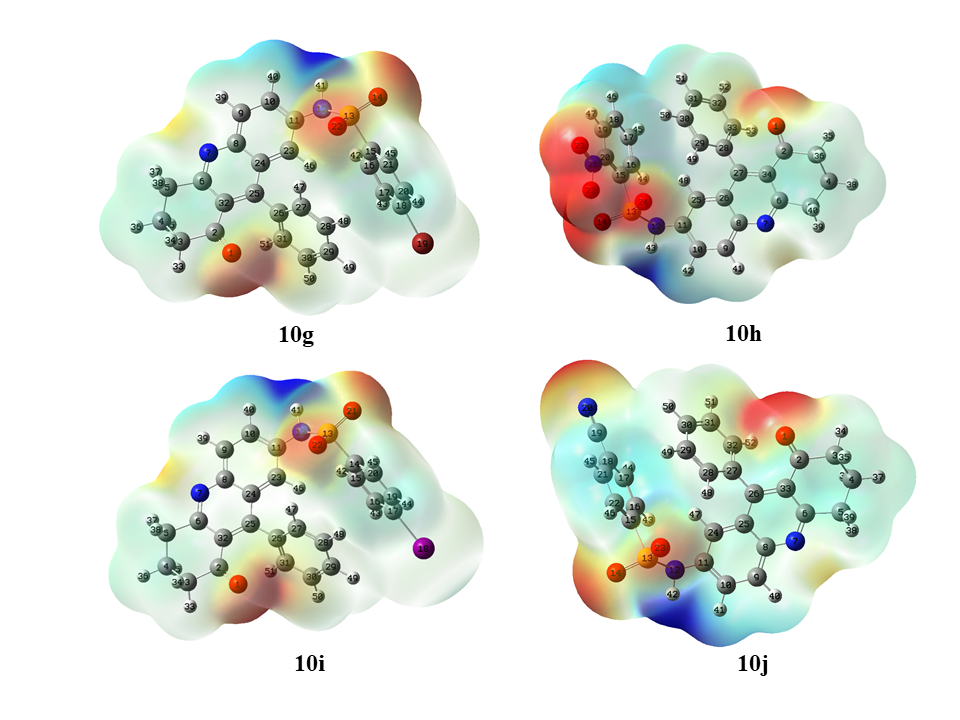
**

**5. Docking Studies**

**Fig S3**

**
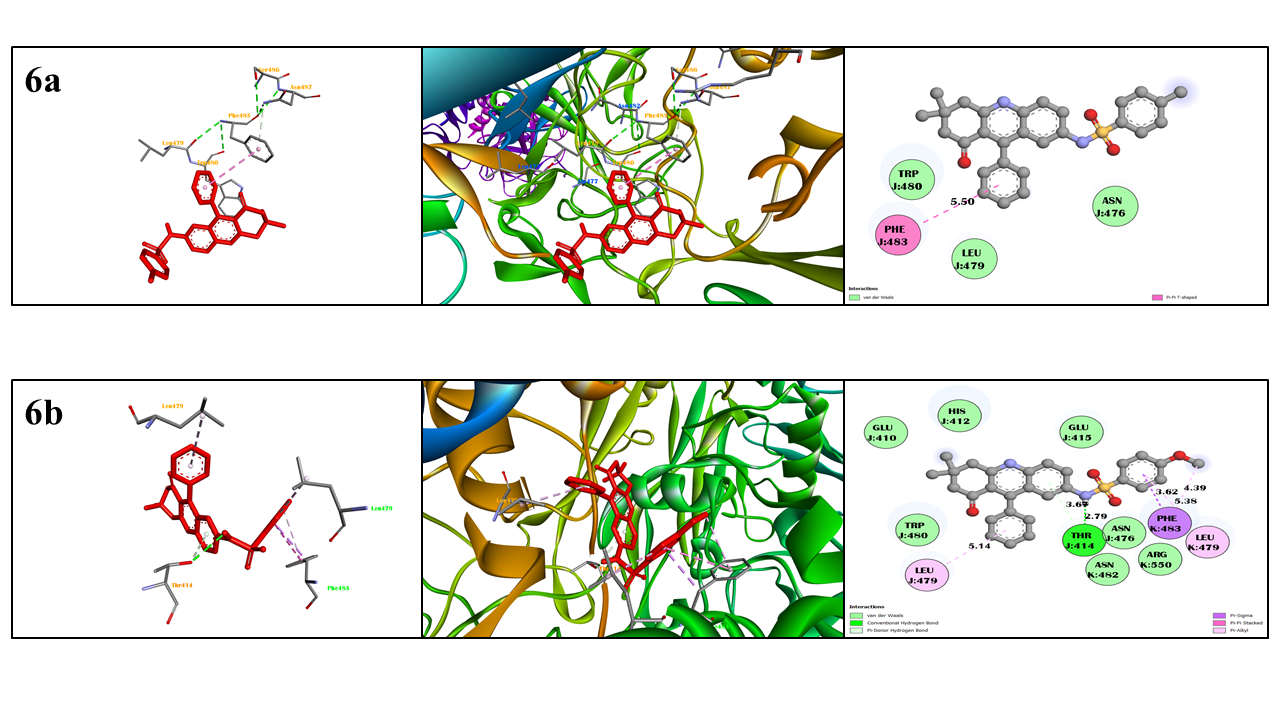
**

**
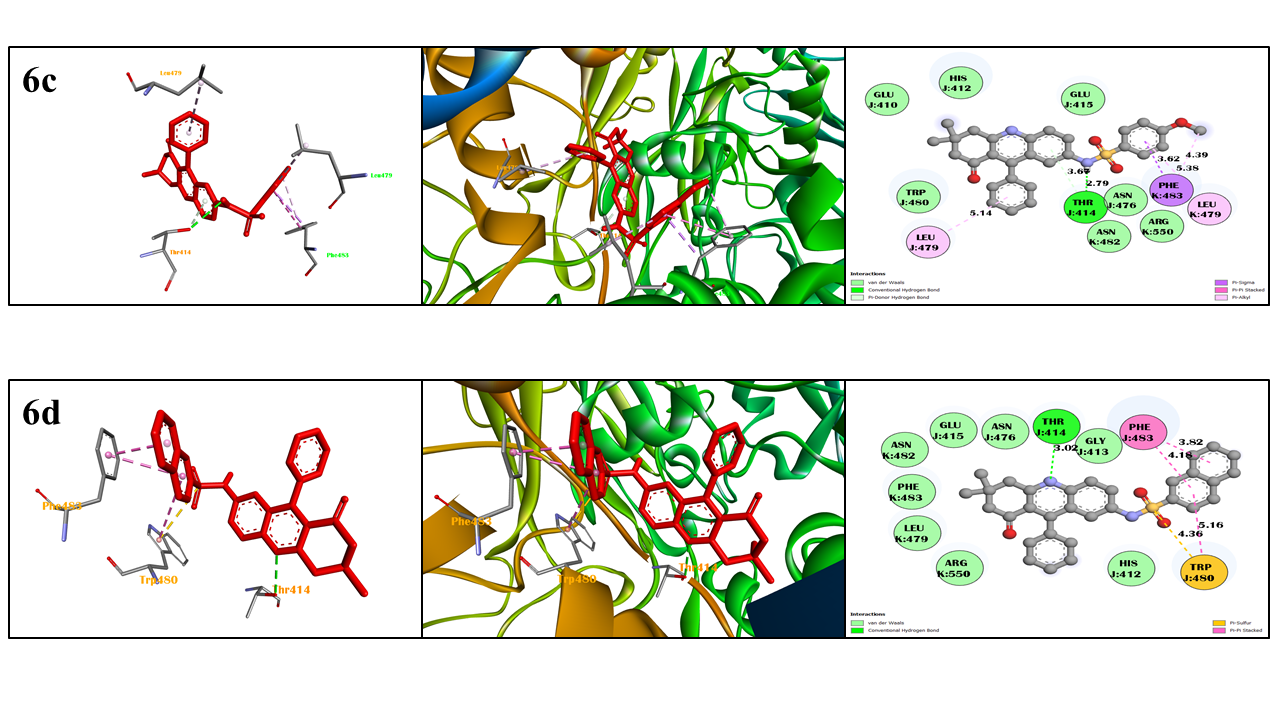
**

**
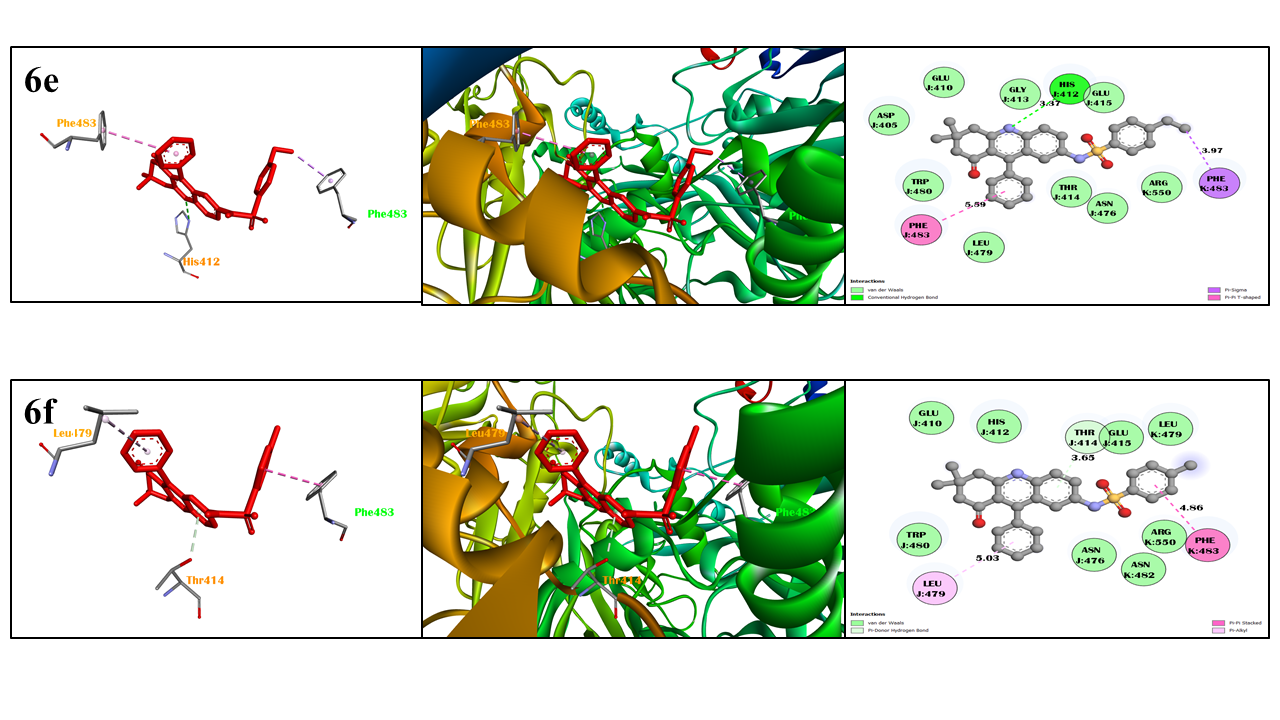

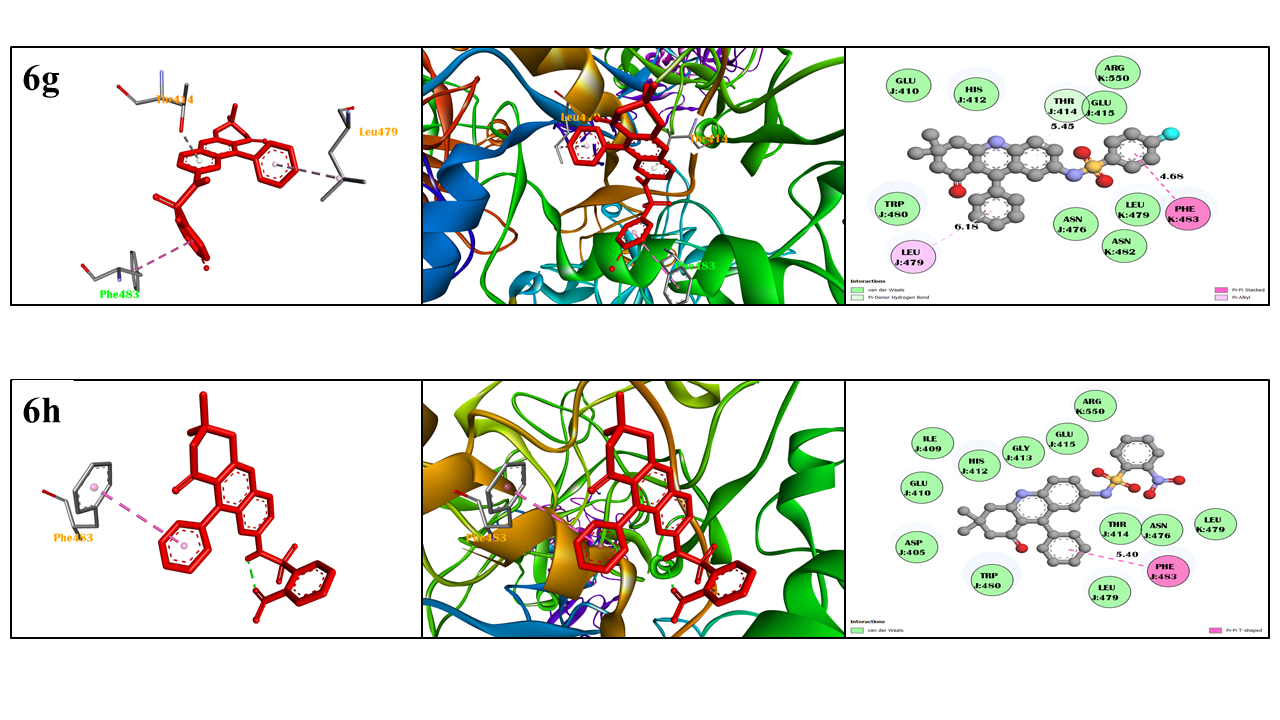

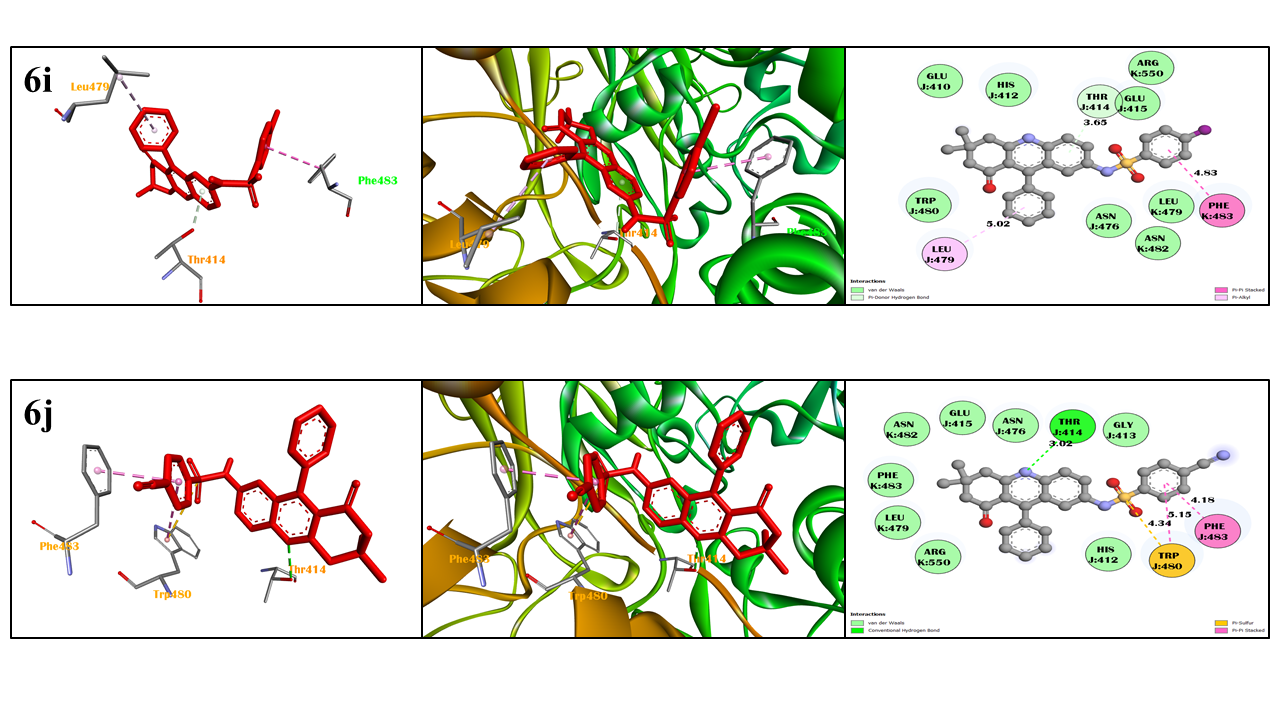

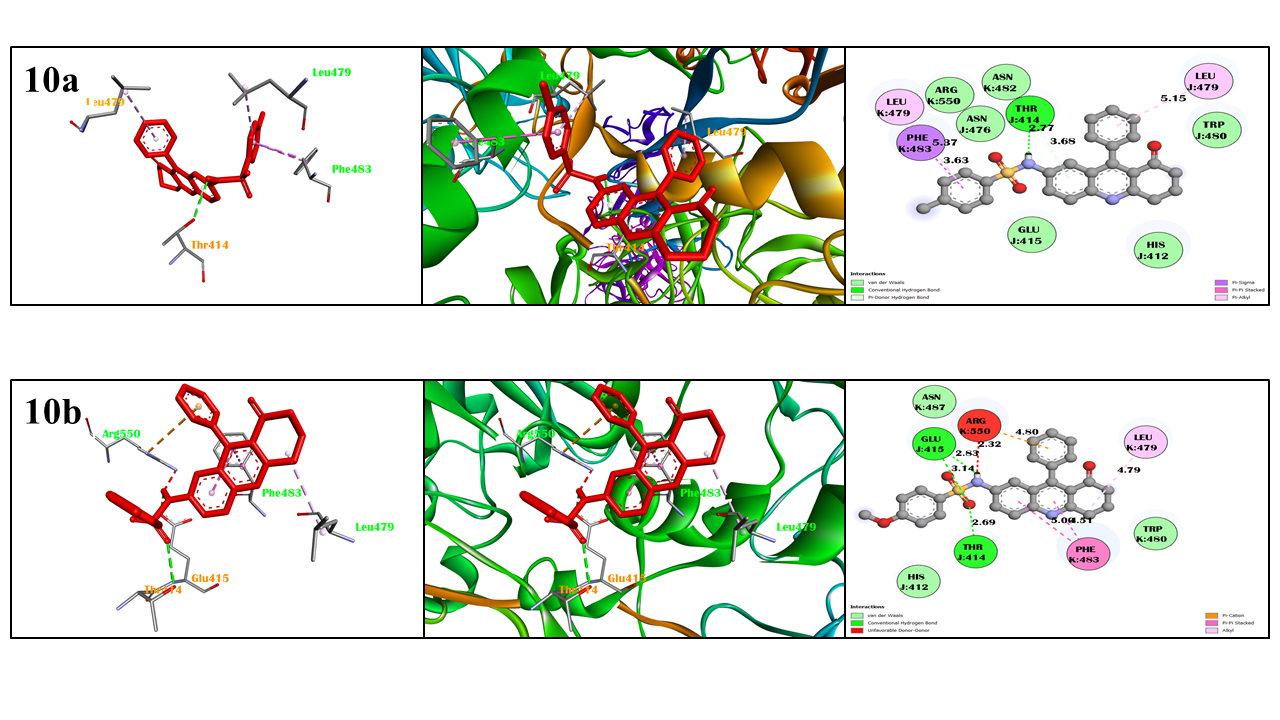

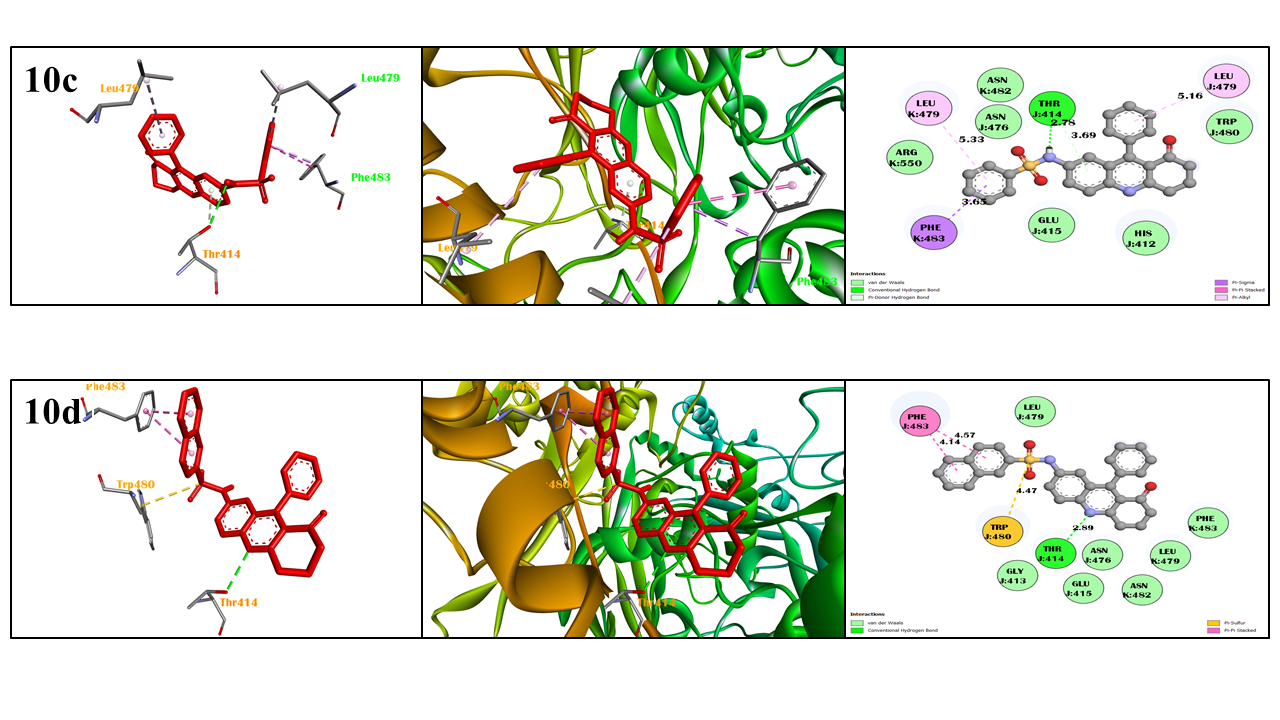

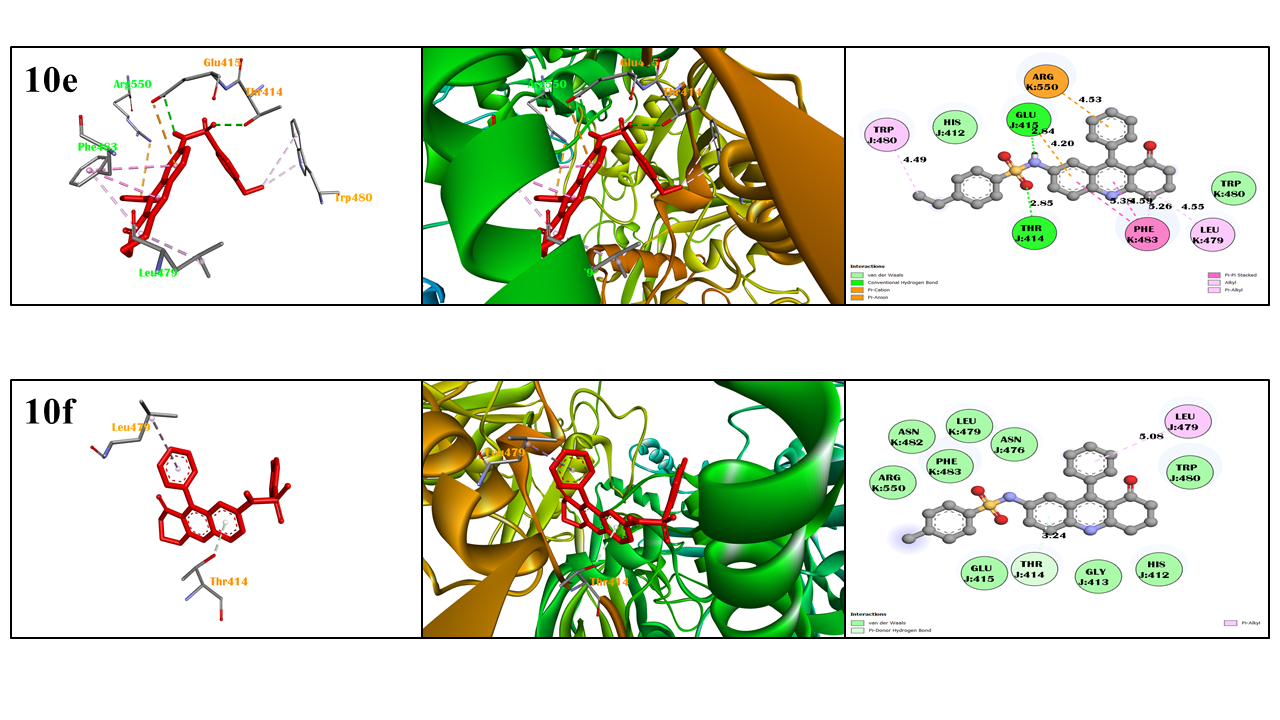

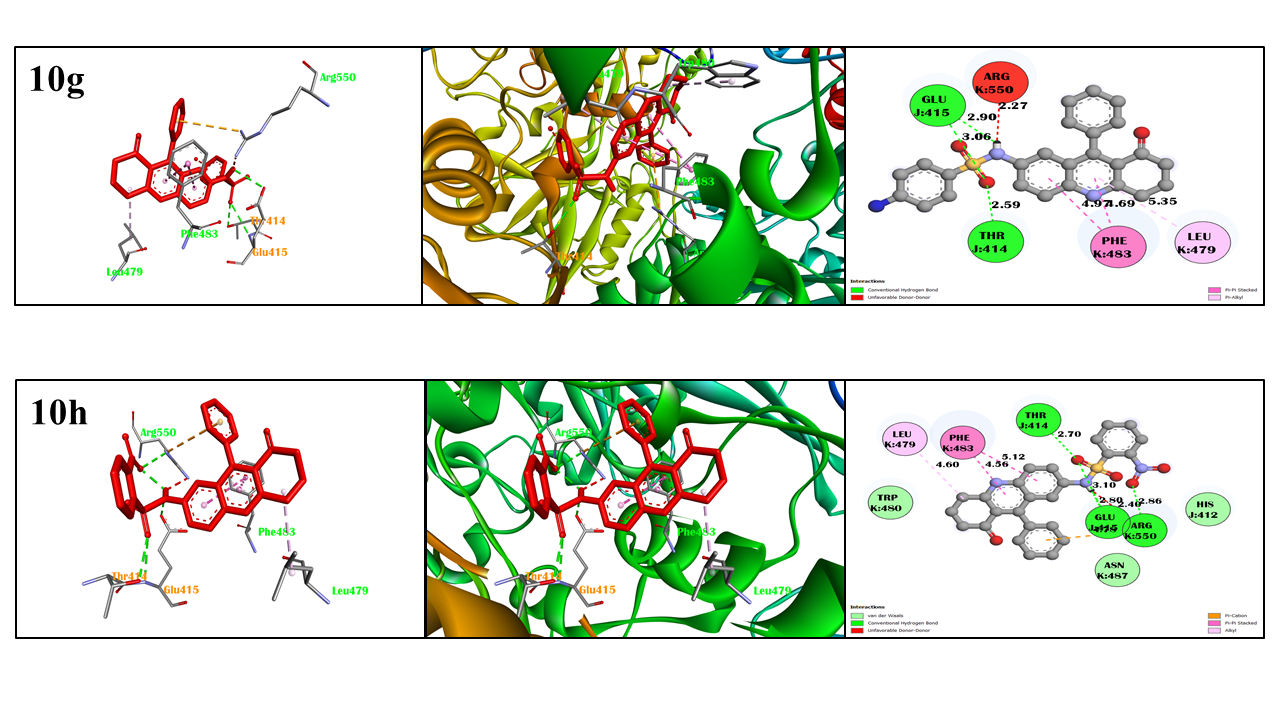

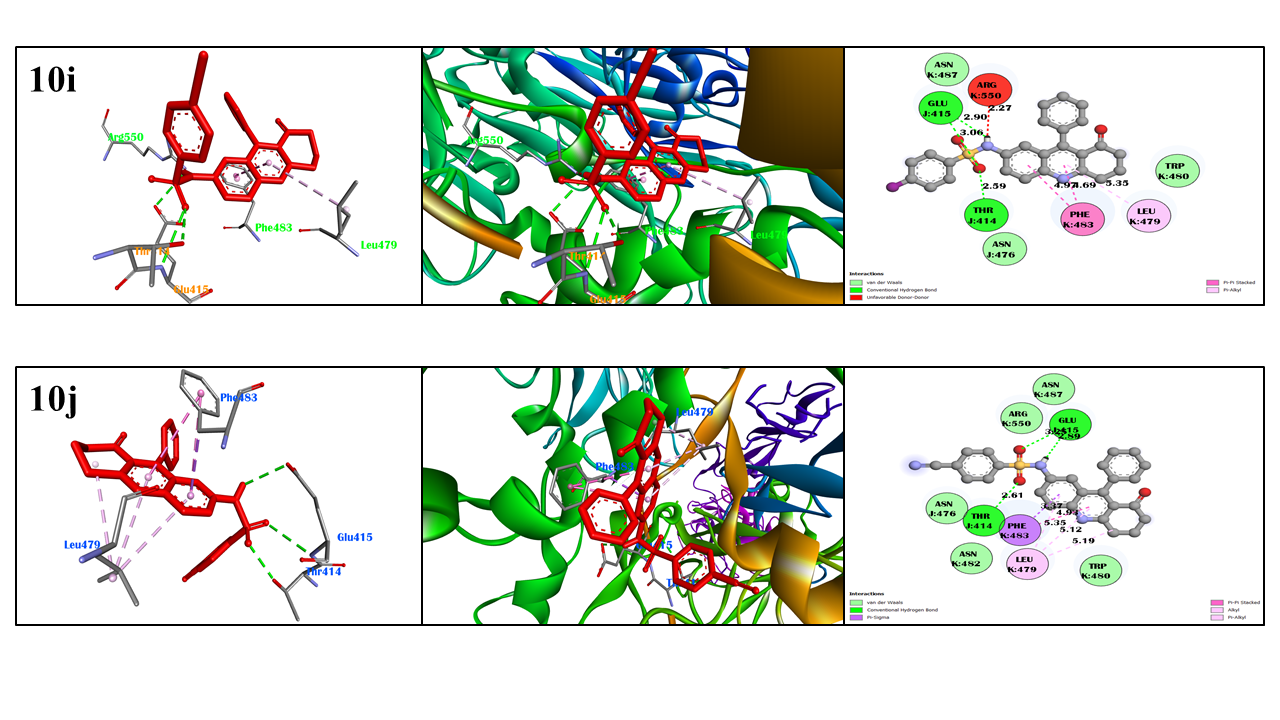
**

| **Cpd.**  **code** | **Binding Affinity (kcal/mol)** | **RMSD**  **(Å)** | **Ki (μM)** | **Key Residues → Interaction Type → Distance** |
| --- | --- | --- | --- | --- |
| **6a** | -10.3 | 1.80 | 0.0278 | PHE480 → π-π T-Shaped (5.5Å) |
| **6b** | -10.4 | 2.61 | 0.0235 | THR414 → H-Bonding (2.79Å) ASN476 → H-Bonding (3.67Å)  PHE483 → π-π stacked (3.62Å) LUE479 → π-Alkyl (5.14Å) |
| **6c** | -10.1 | 1.19 | 0.0389 | TRP480 → π-σ → (3.55Å) TRP480 → π-σ → (3.93Å)  TRP480 → π-π Stacked → (5.30Å) LEU479 → π-Alkyl → (4.43Å)  Arg-550 → π-Alkyl → (5.24Å) |
| **6d** | -11.1 | 4.50 | 0.0071 | THR414 → H-Bonding (3.02Å) PHE483 → π-π Stacked (3.82Å)  PHE483 → π-π stacked (4.18Å) TRP480 → π-Sulfur (4.36Å)  TRP480 → π-π Stacked (5.16Å) |
| **6e** | -10.7 | 1.78 | 0.0141 | HIS412 → H-Bonding (3.37Å) PHE483 → π-σ (3.97Å)  PHE483 → π-π T-Shaped (5.59Å) |
| **6f** | -10.2 | 1.83 | 0.0329 | THR414 → π-Donor H-Bond (3.65Å) PHE483 → π-π Stacked (4.86Å)  LEU479 → π-Alkyl (5.03Å) |
| **6g** | -9.3 | 2.09 | 0.150 | THR414 → H-Bond (5.45Å) PHE483 → π-π Stacked (4.68Å)  LEU479 → π-Alkyl (6.18Å) PHE483 → π-π T-Shaped (5.40Å) |
| **6h** | -10.8 | 2.91 | 0.0119 | PHE483 → π-π T-Shaped (5.40Å) |
| **6i** | -10.2 | 1.80 | 0.0329 | THR414 π-Donor → H-Bond (3.65Å) PHE483 → π-π Stacked (4.83Å)  LEU → π-Alkyl (5.02Å) |
| **6j** | -10.1 | 2.76 | 0.0389 | THR414 → H-Bonding (3.02Å) PHE483 → π-π Stacked (4.18Å)  PHE483 → π-π Stacked (5.51) TRP480 → π-Sulfur (4.34Å) |
| **10a** | -9.8 | 1.39 | 0.0647 | THR414 → H-Bonding (2.77Å) GLU415 → π-Donor H-Bonding (3.68Å)  PHE483 → π-σ Interaction (3.63Å) PHE483 → π-π Stacked (5.87Å)  LEU479 → π-Alkyl (5.15Å) TRP480 → π-Alkyl (5.15Å) |
| **10b** | -10.0 | 1.25 | 0.0461 | THR414 → H-Bonding (2.69Å) GLU415 → H-Bonding (2.83Å)  GLU415 → H-Bonding (3.14Å) ARG550 → Donor-Donor (2.32Å)  ARG550 → π-Cation (4.80Å) PHE483 → π-π Stacked (5.00Å)  PHE483 → π-π Stacked (5.51Å) LEU479 → Alkyl Interaction (4.79Å) |
| **10c** | -9.6 | 1.33 | 0.0906 | THR414 → H-Bonding (2.78Å) THR414 → π-Donor H-Bonding (3.69Å)  PHE483 → π-σa (3.65Å) LEU479 → π-Alkyl (5.33Å)  LEU479 → π-Alkyl (5.16Å) |
| **10d** | -10.4 | 1.69 | 0.0235 | PHE483 → Aromatic (4.14Å) PHE483 → Hydrophobic (4.14Å)  TRP480 → π-Sulpur (4.47Å) THR414 → H-Bonding (2.89Å) |
| **10e** | -10.0 | 1.52 | 0.0461 | GLU415 → H-Bonding (2.84Å) THR414 → H-Bonding (2.85Å)  ARG550 → π-Interaction (4.53Å) GLU415 → π-π Stacking (4.20)  PHE483 → π-π Stacked (5.39) PHE483 → π-π Stacked (5.59)  TRP480 → π-π Stacked (4.49Å) LEU479 → π-Alkyl (4.55Å)  PHE483 → π-Alkyl (5.26Å) |
| **10f** | -10.1 | 3.04 | 0.0389 | THR414 → π-Donor H-Bonding (3.24Å) LEU479 → π-Alkyl (5.08Å) |
| **10g** | -9.2 | 1.66 | 0.150 | GLU415 → H-Bonding (2.90Å) GLU415 → H-Bonding (3.06Å)  THR414 → H-Bonding (2.59Å) ARG550 → Donor- Donor (2.27Å)  PHE483 → π-π (4.97Å) PHE483 → π-π (4.69Å)  LEU479 → π-Alkyl (5.35Å) PHE483 → π-Alkyl (5.0Å) |
| **10h** | -9.5 | 2.19 | 0.107 | THR414 → H-Bonding (2.70Å) GLU415 → H-Bonding (3.10Å)  GLU415 → H-Bonding (2.80Å) ARG550 → H-Bonding (2.40Å)  ARG550 → H-Bonding (2.86Å) GLU415 → Donor-Donor (2.40Å)  PHE483 → π-π Stacking (4.56Å) PHE483 → π-π Stacking (5.12Å)  LUE479 → π-Alkyl (4.60Å) |
| **10i** | -10.2 | 1.03 | 0.0329 | GLU415 → H-Bonding (2.90Å) GLU415 → H-Bonding (3.06Å)  THR414 → H-Bonding (2.59Å) ARG → H-Bonding (2.27Å)  PHE483 → π-π Stacked (4.97Å) PHE483 → π-π Stacked (4.69Å)  LEU479 → π-Alkyl Stacked (5.35Å) |
| **10j** | -10.3 | 0.91 | 0.0278 | GLU415 → H-Bonding (2.89Å) GLU415 → H-Bonding (3.45Å)  THR414 → H-Bonding (2.61Å) ASN476 → H-Bonding (3.37Å)  PHE483 → π-σ (3.37Å) PHE483 → π-π Stacked (4.98Å)  LEU479 → π-π (5.35Å) TRP480 → π-Alkyl (5.19Å) |

**Table 2 Interaction of Ligands (6a-6j & 10a-10j) with Adenovirus (pdb: 9cm2)**

**6. IR, 1H, 13C, DEPT-135 and 2D NMR and HRMS Spectra**

**
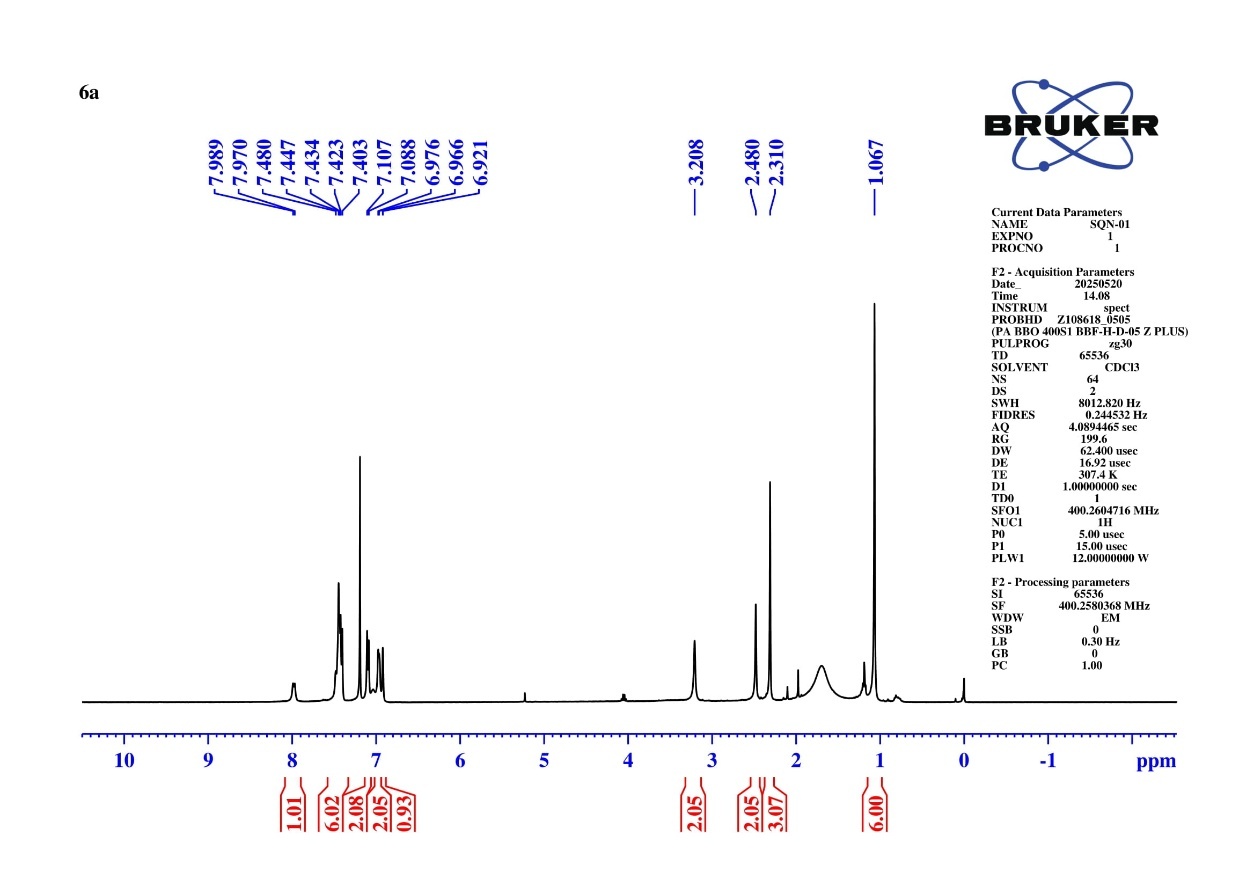
Fig S4** 1H NMRSpectrum of N-(6,6-dimethyl-8-oxo-9-phenyl-5,6,7,8-tetrahydroacridin-2-yl)-4-methylbenzenesulfonamide **(6a)**

**
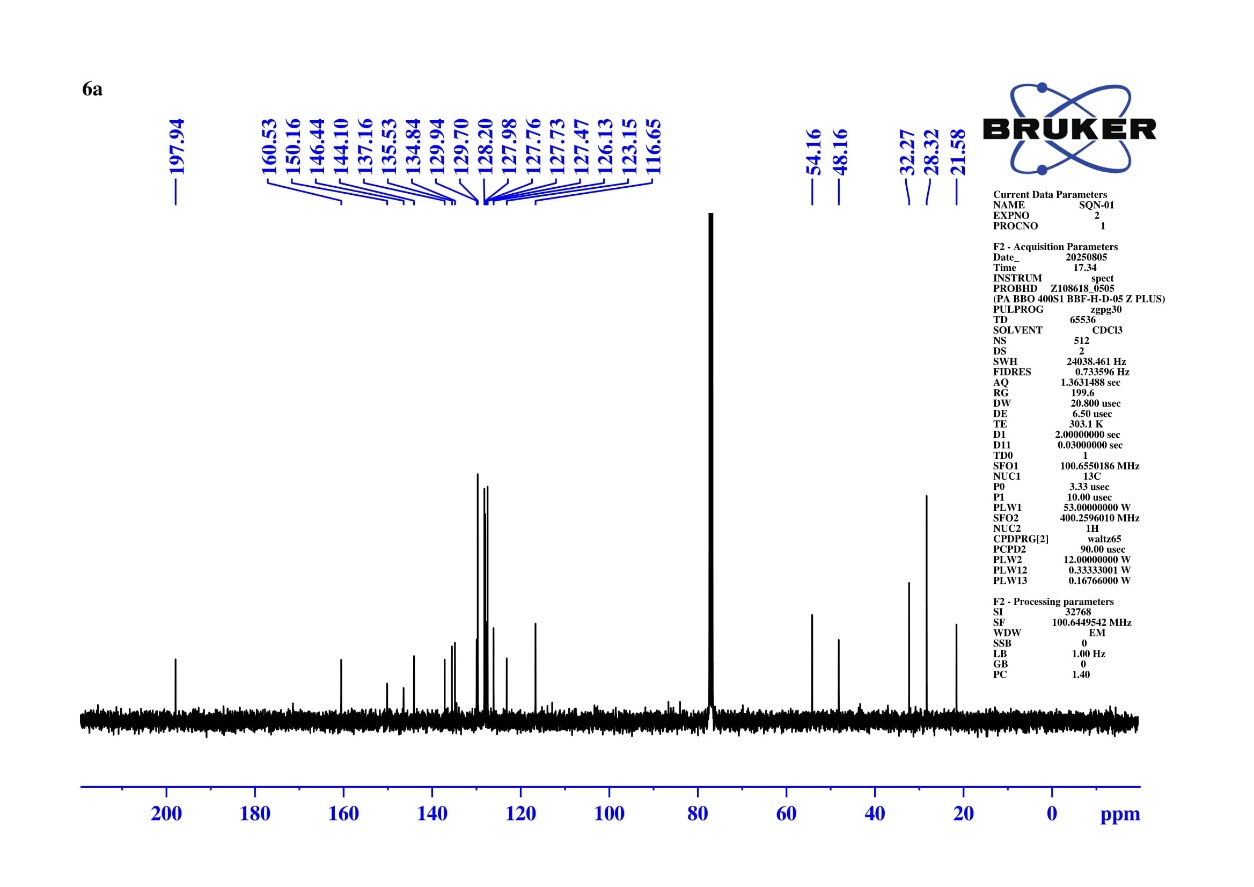
Fig S5** 13C NMRSpectrum of N-(6,6-dimethyl-8-oxo-9-phenyl-5,6,7,8-tetrahydroacridin-2-yl)-4-methylbenzenesulfonamide **(6a)**


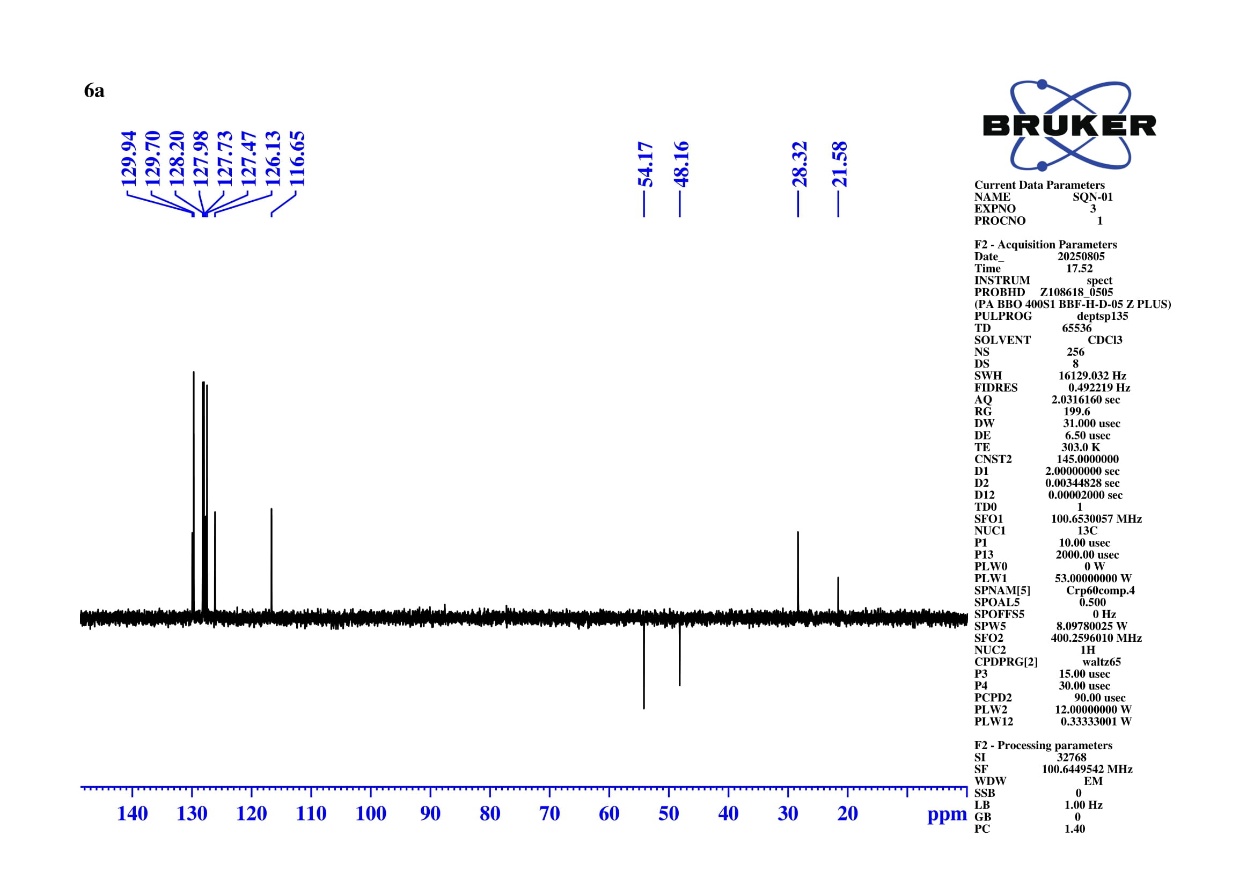
**Fig S6** DEPT-135NMRSpectrum of N-(6,6-dimethyl-8-oxo-9-phenyl-5,6,7,8-tetrahydroacridin-2-yl)-4-methylbenzenesulfonamide **(6a)**

Calculated Exact Mass = 471.1742

[M+H] = 471.174

**Fig S7** HRMSSpectrum of N-(6,6-dimethyl-8-oxo-9-phenyl-5,6,7,8-tetrahydroacridin-2-yl)-4-methylbenzenesulfonamide **(6a)
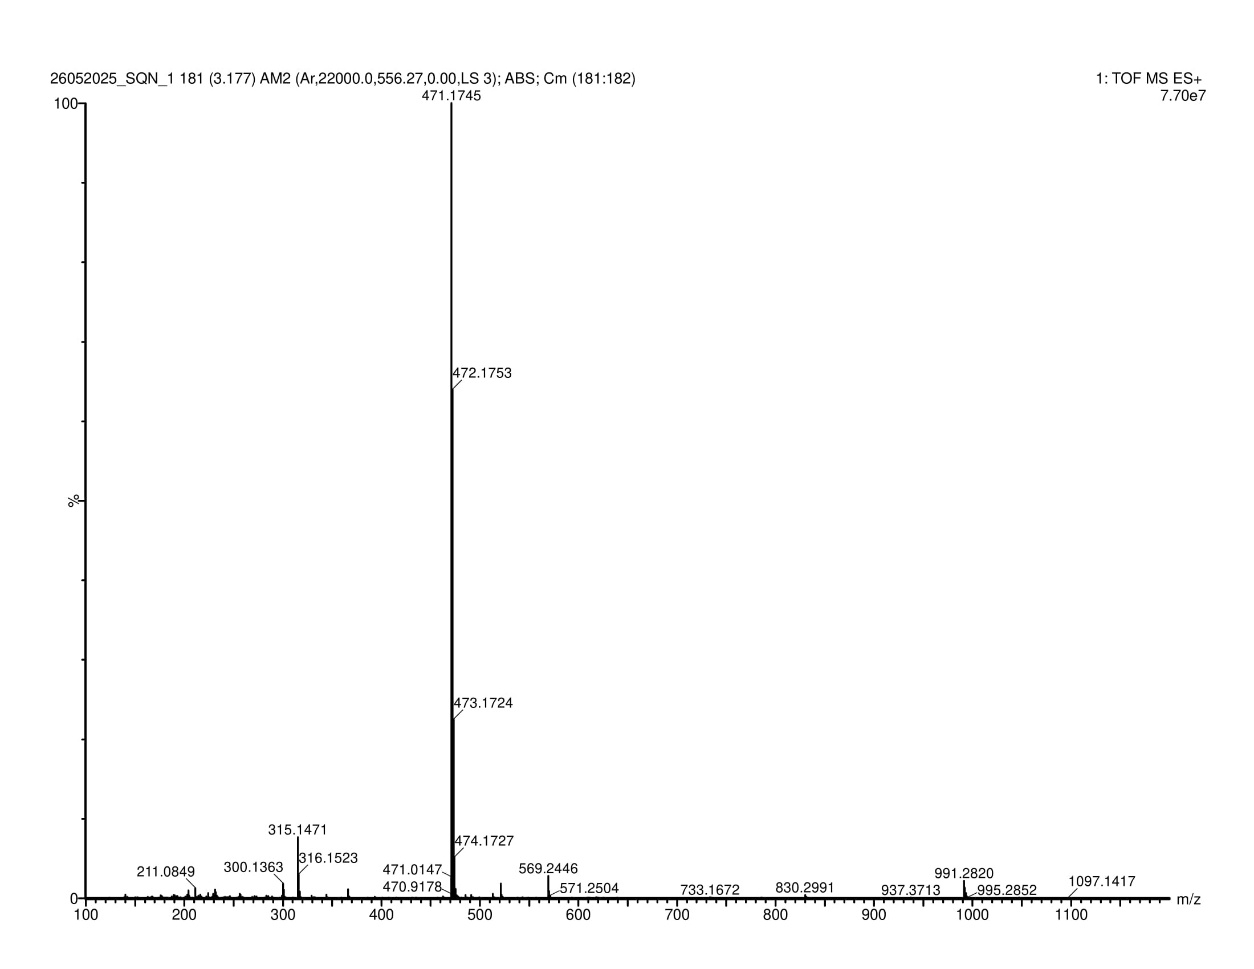
**


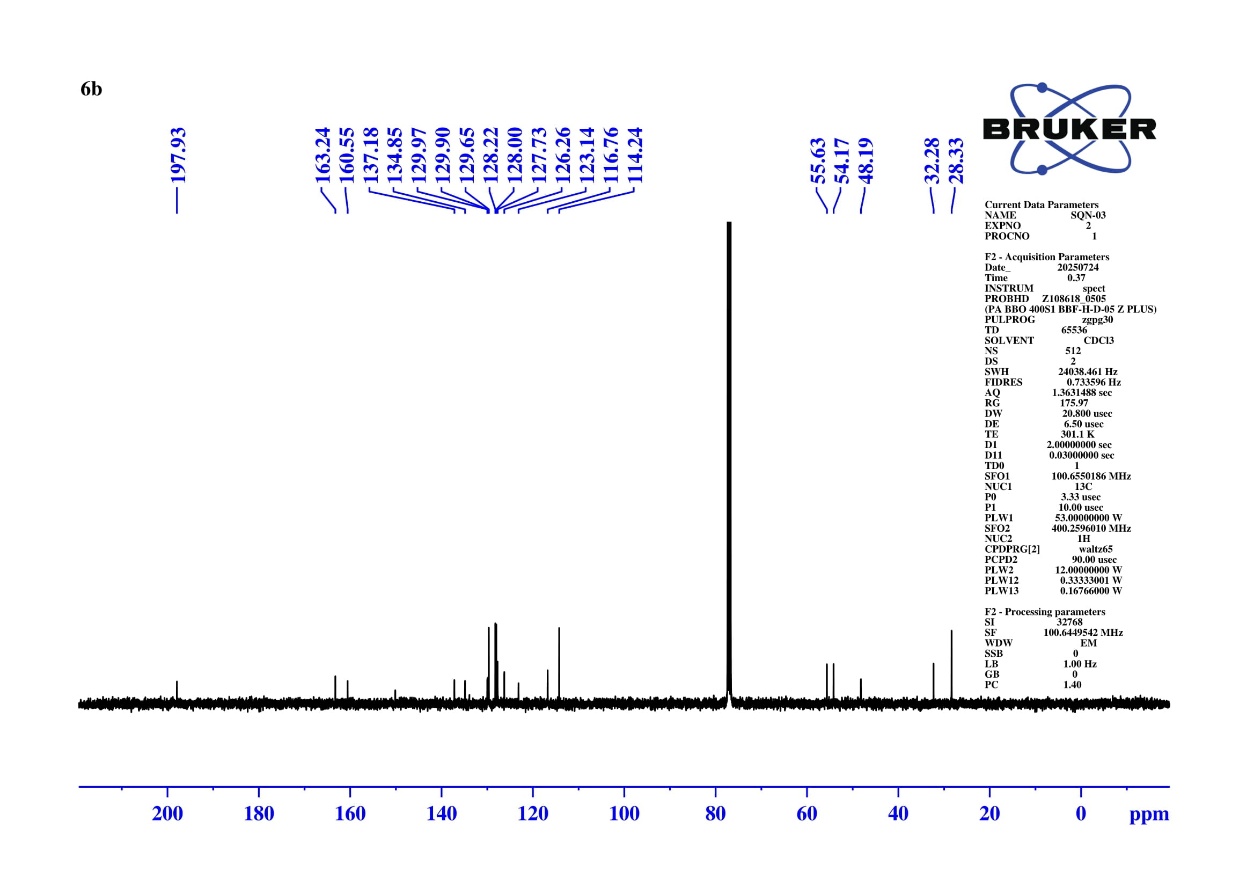

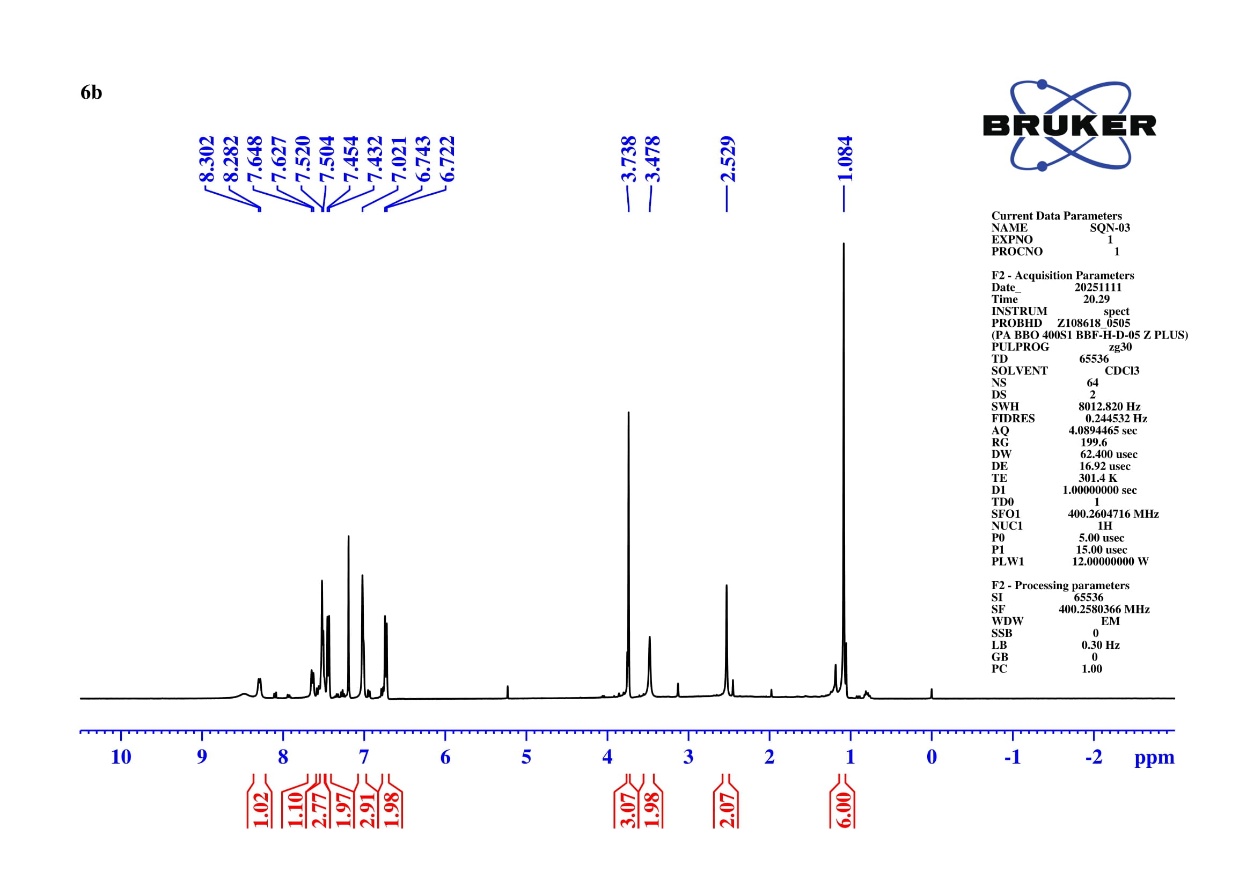
**Fig S8** 1HNMR Spectrum of N-(6,6-dimethyl-8-oxo-9-phenyl-5,6,7,8-tetrahydroacridin-2-yl)-4-methoxybenzenesulfonamide **(6b)**

**Fig S9** 13C NMRSpectrum of N-(6,6-dimethyl-8-oxo-9-phenyl-5,6,7,8-tetrahydroacridin-2-yl)-4-methoxybenzenesulfonamide **(6b)**

**
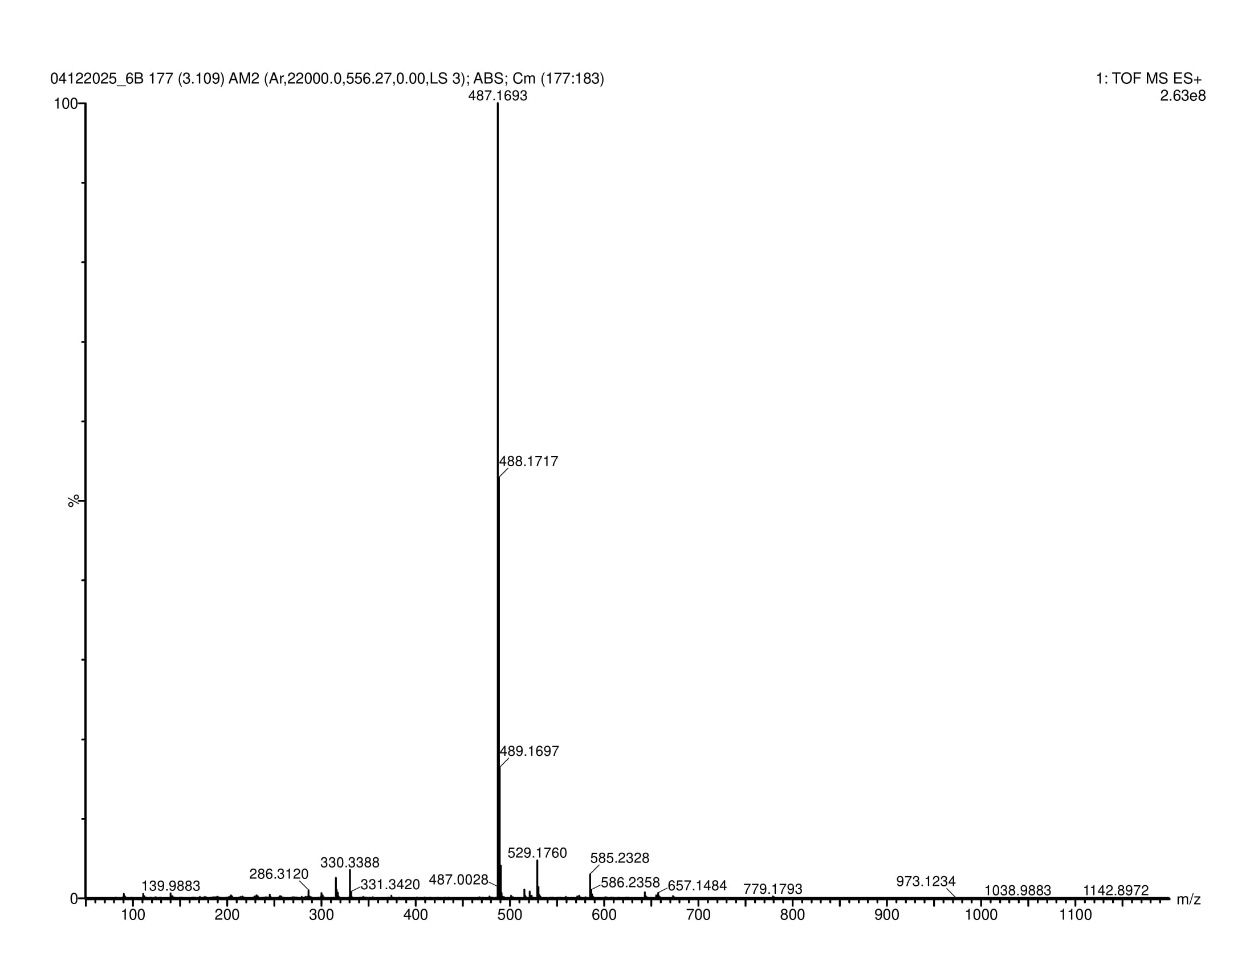
**
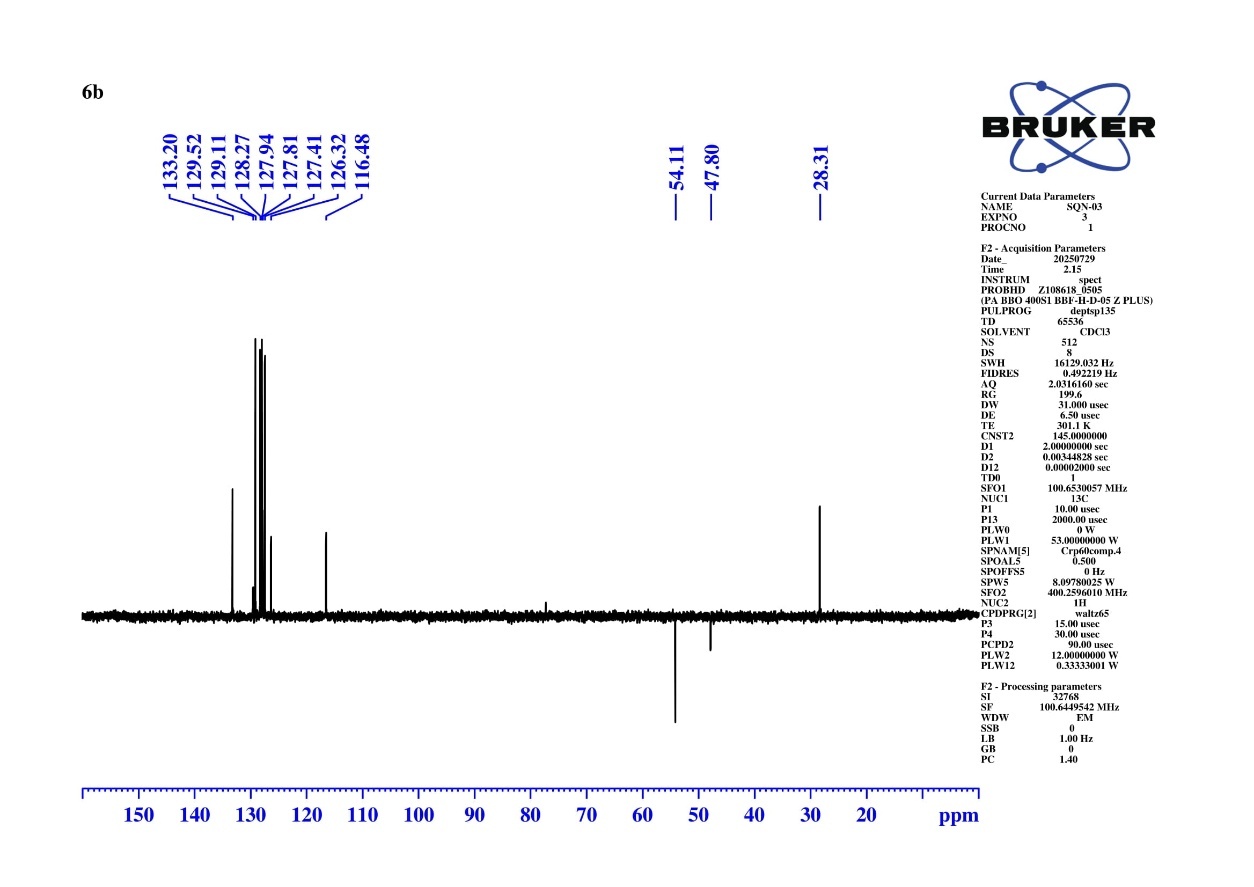
**Fig S10** DEPT-135 **NMR** Spectrum of N-(6,6-dimethyl-8-oxo-9-phenyl-5,6,7,8-tetrahydroacridin-2-yl)-4-methoxybenzenesulfonamide **(6b)**

Calculated Exact Mass = 487.1691

[M+H] = 487.1693

**Fig S11** HRMS Spectrum of N-(6,6-dimethyl-8-oxo-9-phenyl-5,6,7,8-tetrahydroacridin-2-yl)-4-methoxybenzenesulfonamide **(6b)**

**
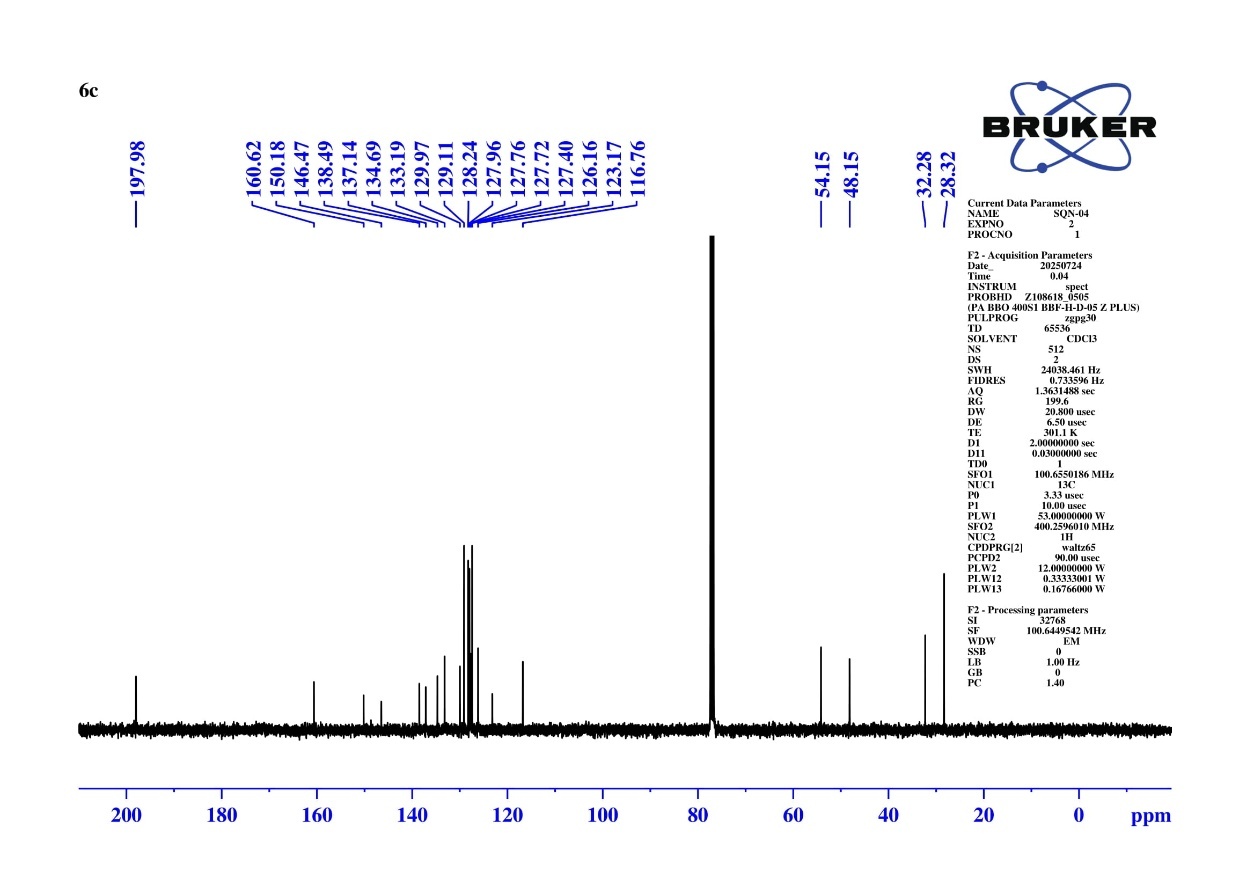
Fig S12** 1H NMR spectrum of N-(6,6-dimethyl-8-oxo-9-phenyl-5,6,7,8-tetrahydroacridin-2-yl) benzenesulfonamide (**6c)
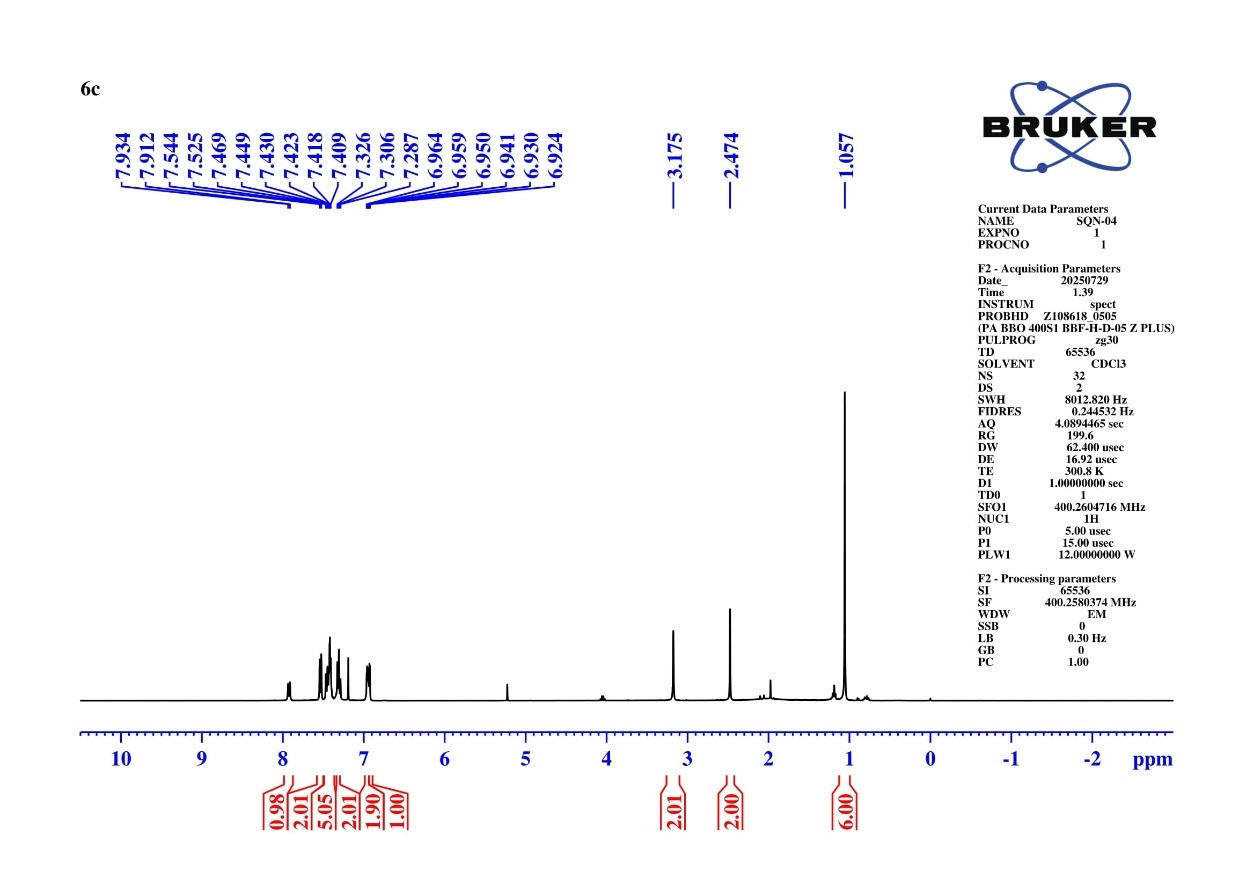
**

**Fig 13** 13C NMR spectrum of N-(6,6-dimethyl-8-oxo-9-phenyl-5,6,7,8-tetrahydroacridin-2-yl) benzenesulfonamide **(6c)**


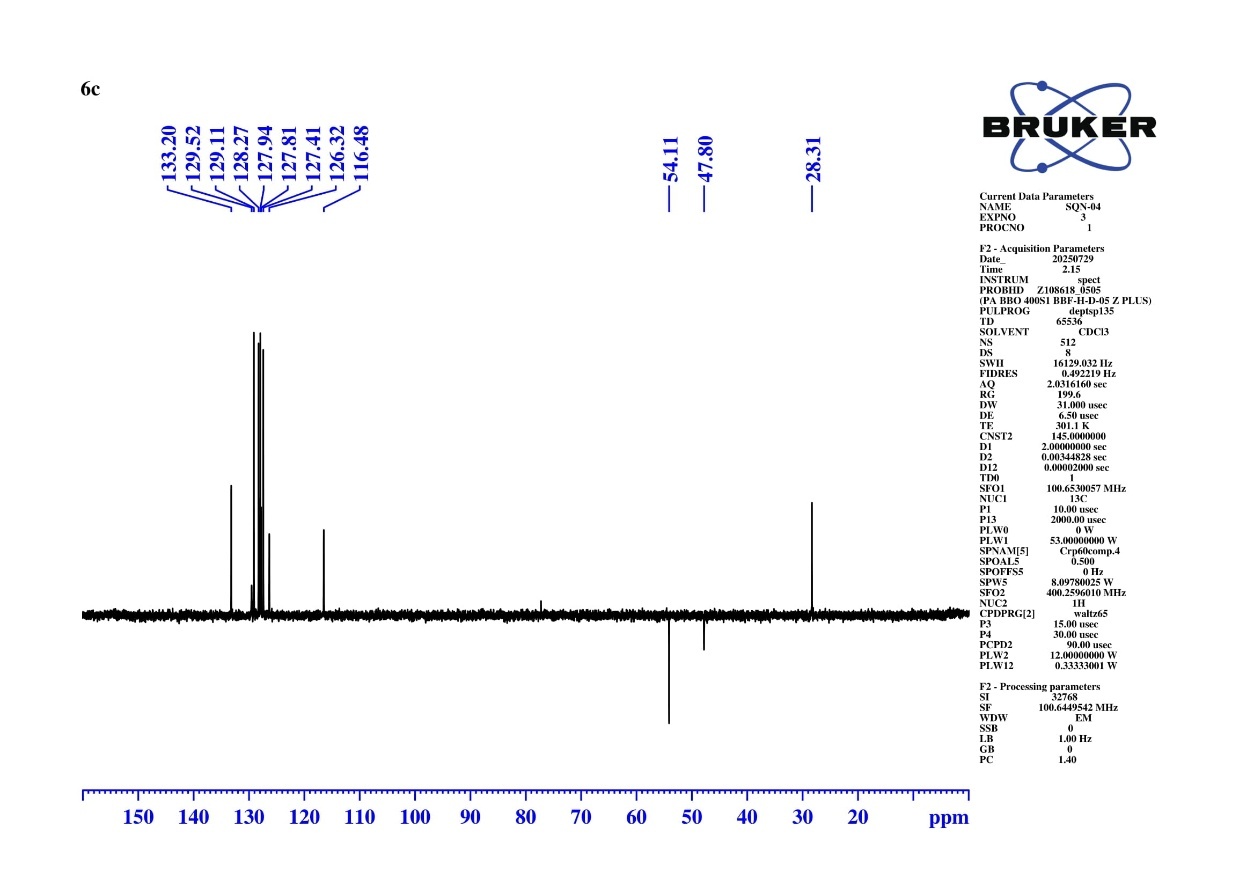
**Fig S15** DEPT-135 spectrum of N-(6,6-dimethyl-8-oxo-9-phenyl-5,6,7,8-tetrahydroacridin-2-yl) benzenesulfonamide **(6c)**

Calculated Exact Mass = 457.1585

[M+H] = 457.1587


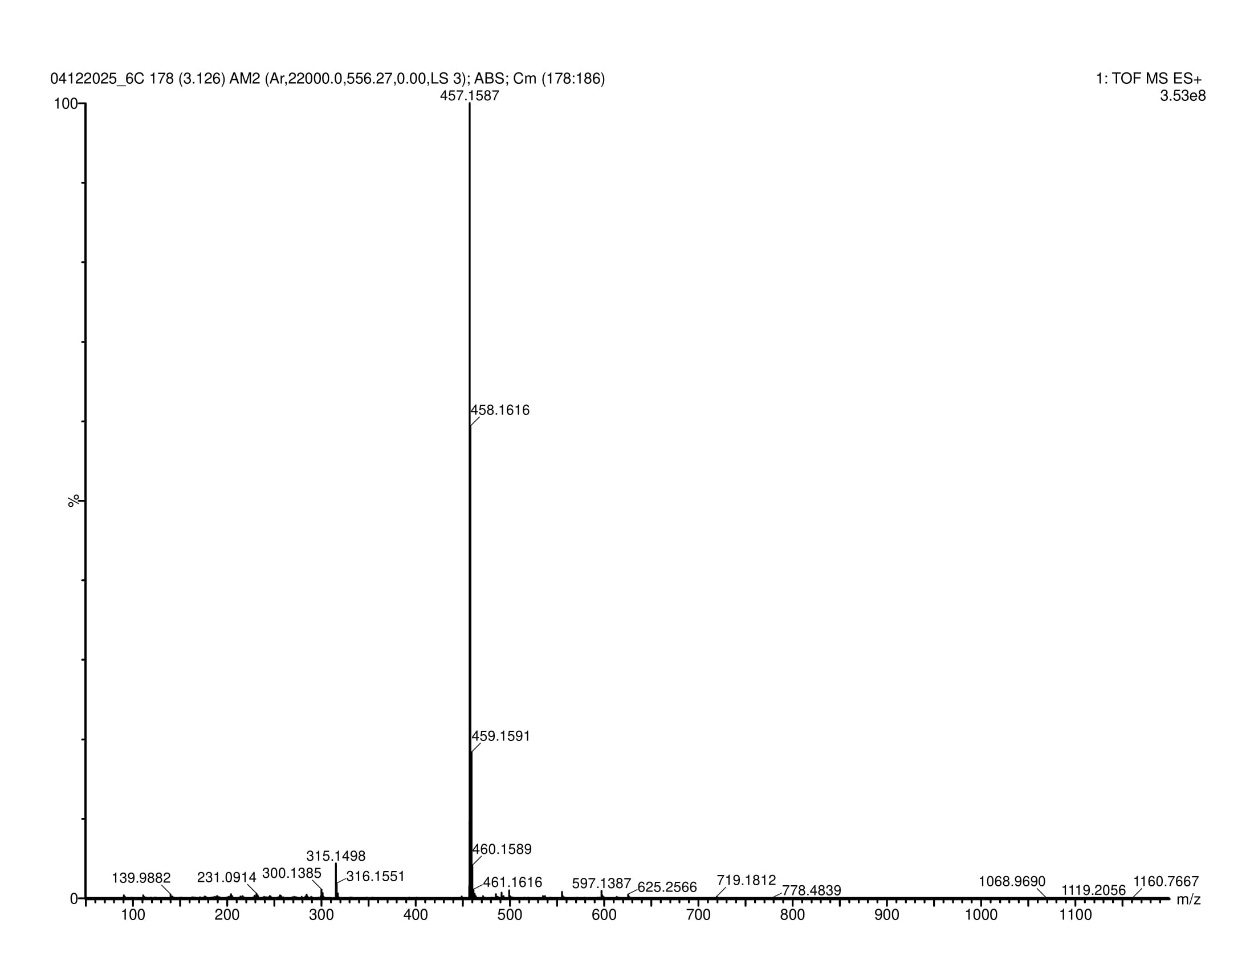
**Fig S16** HRMS spectrum of N-(6,6-dimethyl-8-oxo-9-phenyl-5,6,7,8-tetrahydroacridin-2-yl) benzenesulfonamide **(6c)**

**
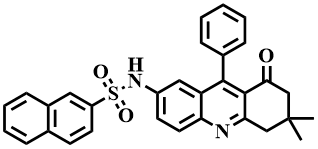
**
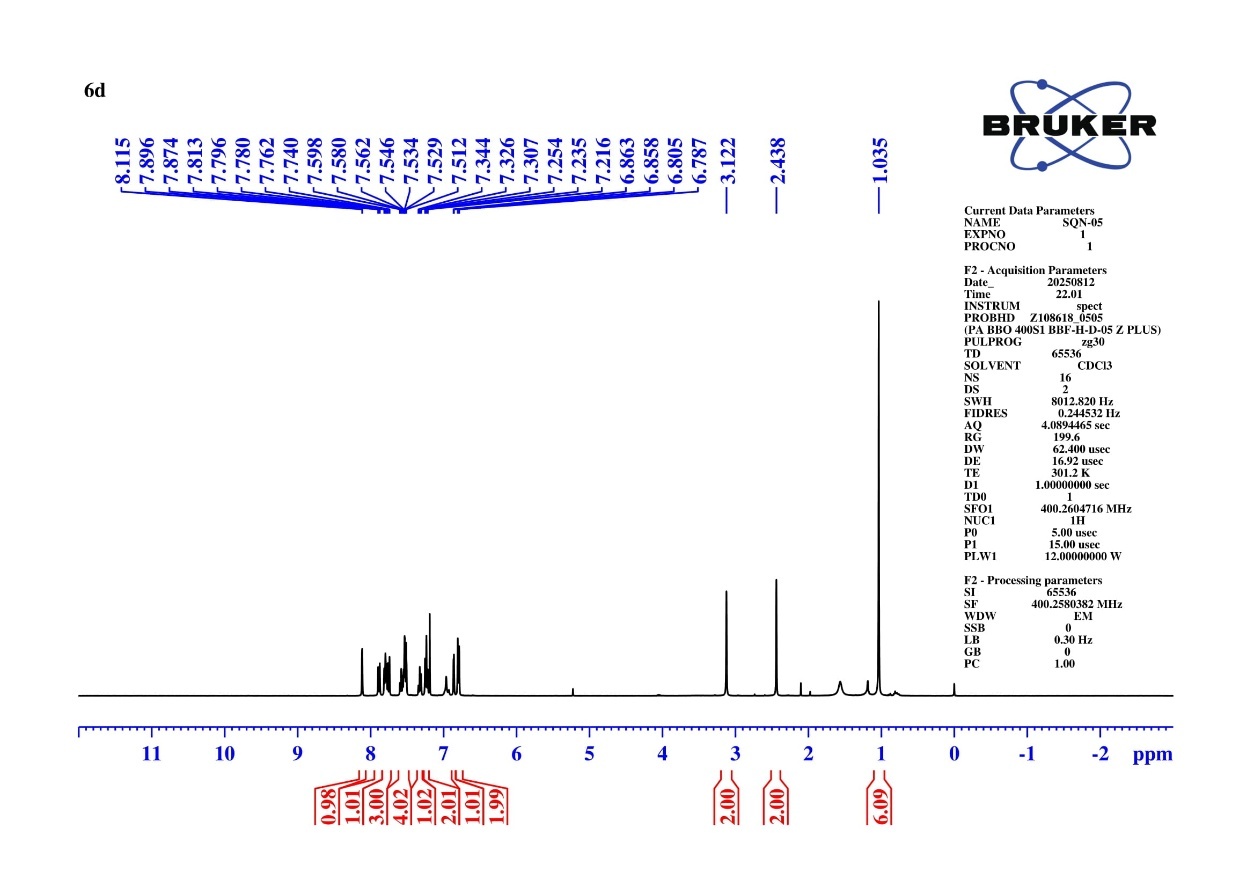
**Fig S17** 1H NMR Spectrum of N-(6,6-dimethyl-8-oxo-9-phenyl-5,6,7,8-tetrahydroacridin-2-yl) naphthalene-2-sulfonamide **(6d)**

**Fig S18** 13C NMR Spectrum of N-(6,6-dimethyl-8-oxo-9-phenyl-5,6,7,8-tetrahydroacridin-2-yl) naphthalene-2-sulfonamide **(6d)**
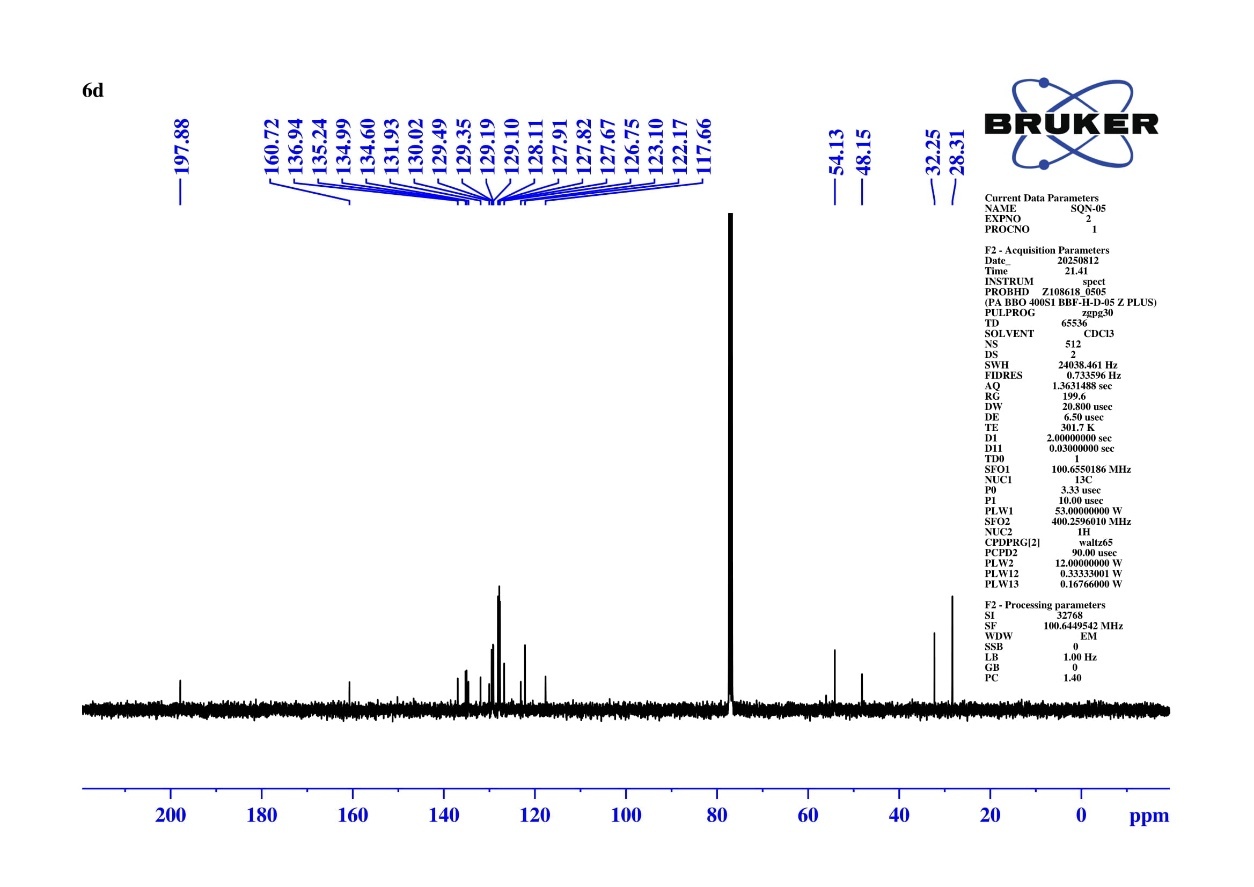


**Fig 19** DEPT-135 NMR Spectrum of N-(6,6-dimethyl-8-oxo-9-phenyl-5,6,7,8-tetrahydroacridin-2-yl) naphthalene-2-sulfonamide **(6d)**

**
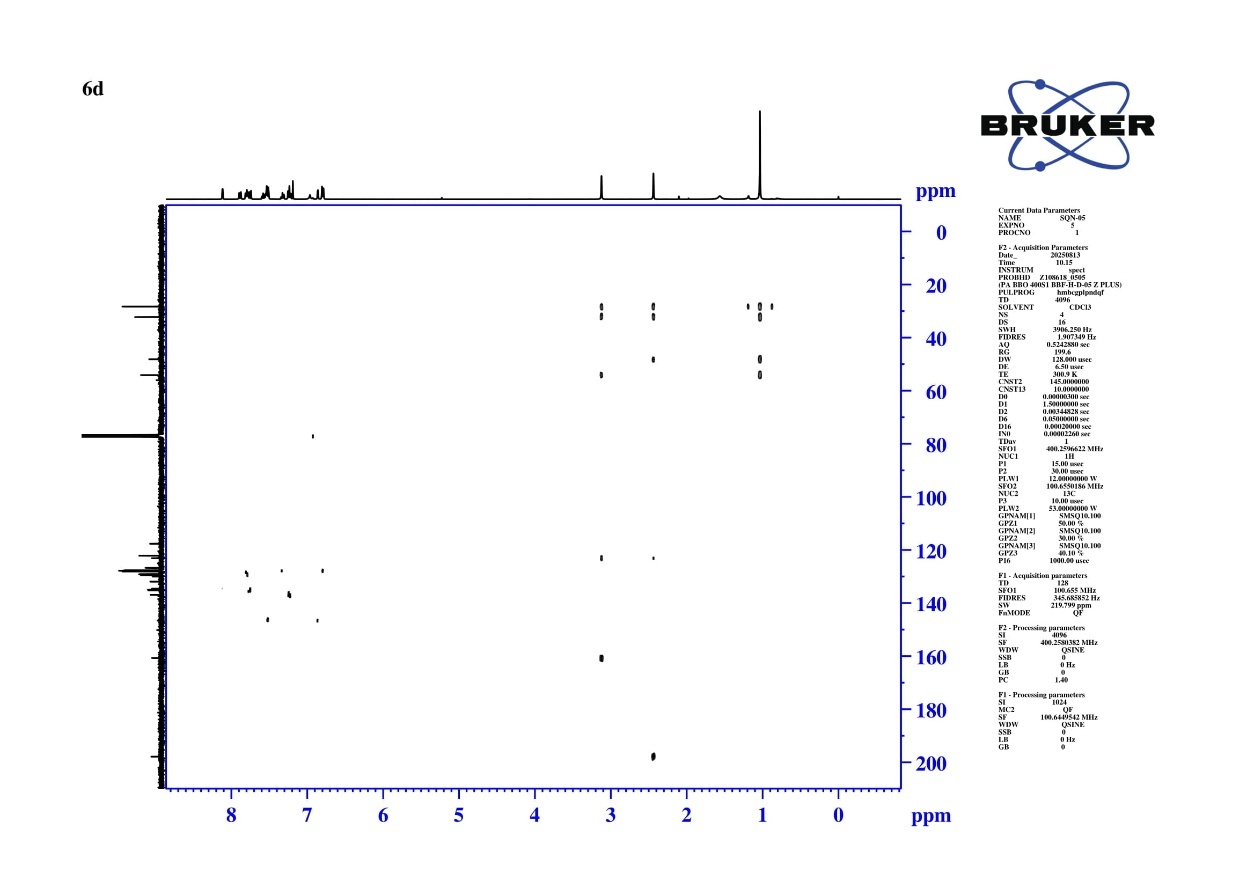
Fig S20** HMBC NMR Spectrum of N-(6,6-dimethyl-8-oxo-9-phenyl-5,6,7,8-tetrahydroacridin-2-yl) naphthalene-2-sulfonamide **(6d)**
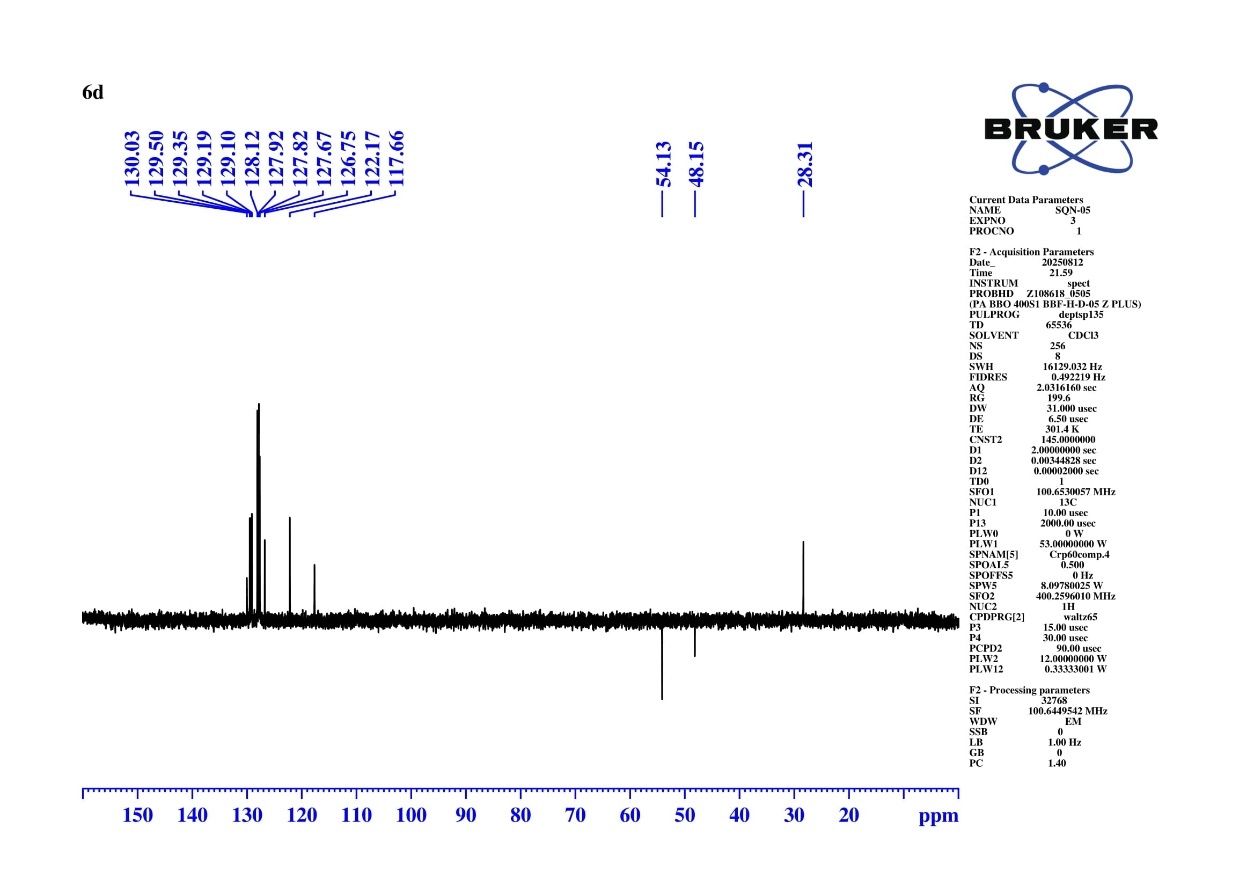


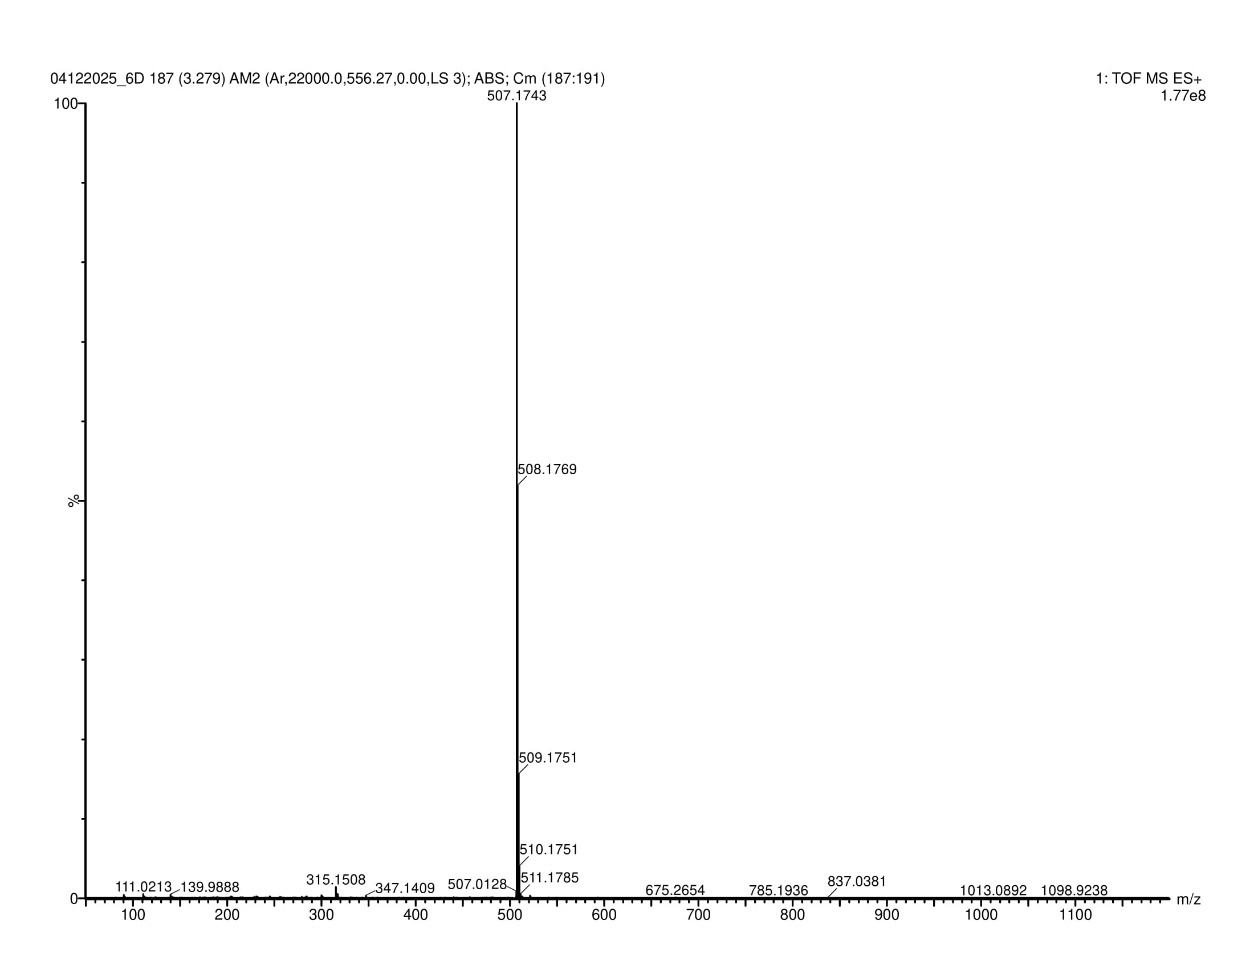

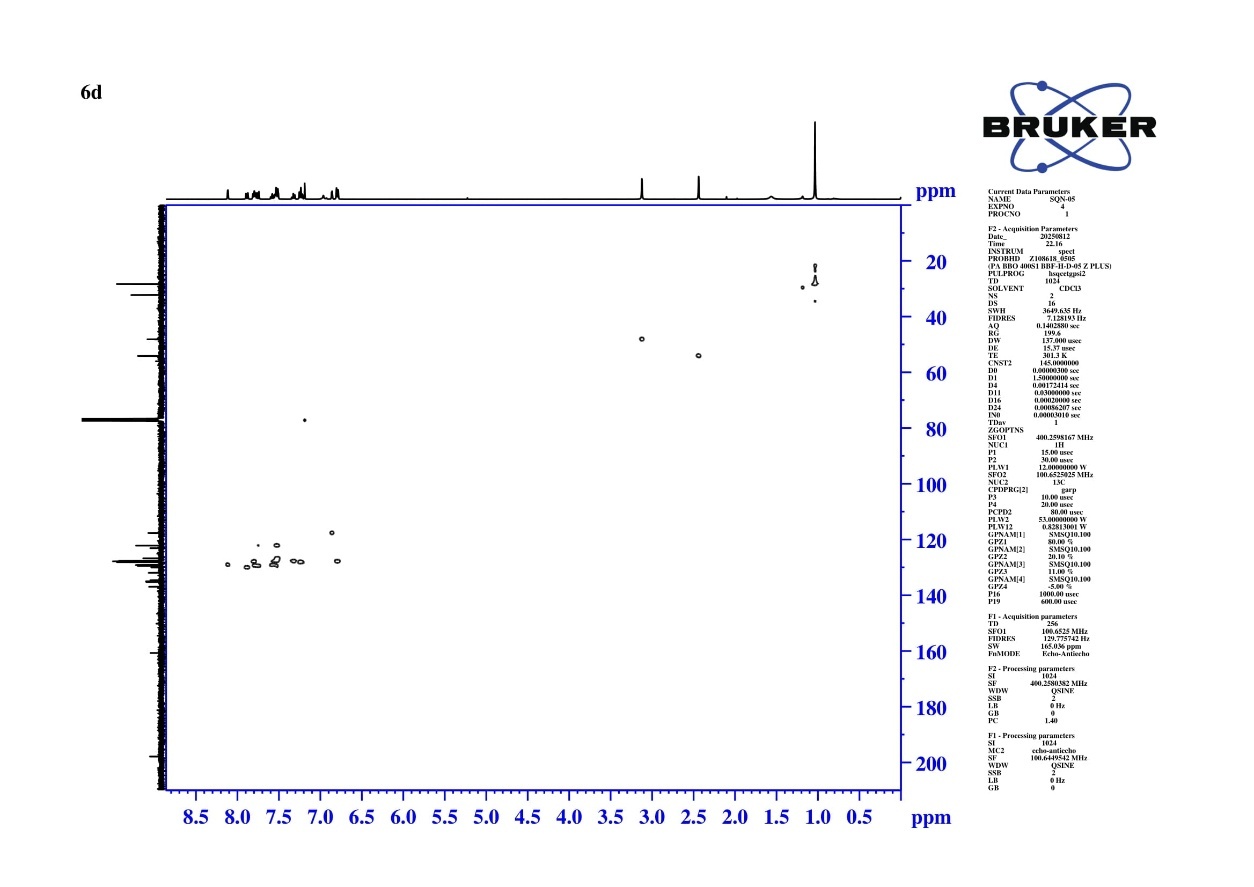
**Fig S21** HSQC NMR Spectrum of N-(6,6-dimethyl-8-oxo-9-phenyl-5,6,7,8-tetrahydroacridin-2-yl) naphthalene-2-sulfonamide **(6d)**

Calculated Exact Mass = 507.1742

[M+H] = 507.1743

**Fig S22** HRMS Spectrum of N-(6,6-dimethyl-8-oxo-9-phenyl-5,6,7,8-tetrahydroacridin-2-yl) naphthalene-2-sulfonamide **(6d)**

**Fig S27** 1H NMR Spectrum of 4-chloro-N-(6,6-dimethyl-8-oxo-9-phenyl-5,6,7,8-tetrahydroacridin-2-yl) benzenesulfonamide **(6f)
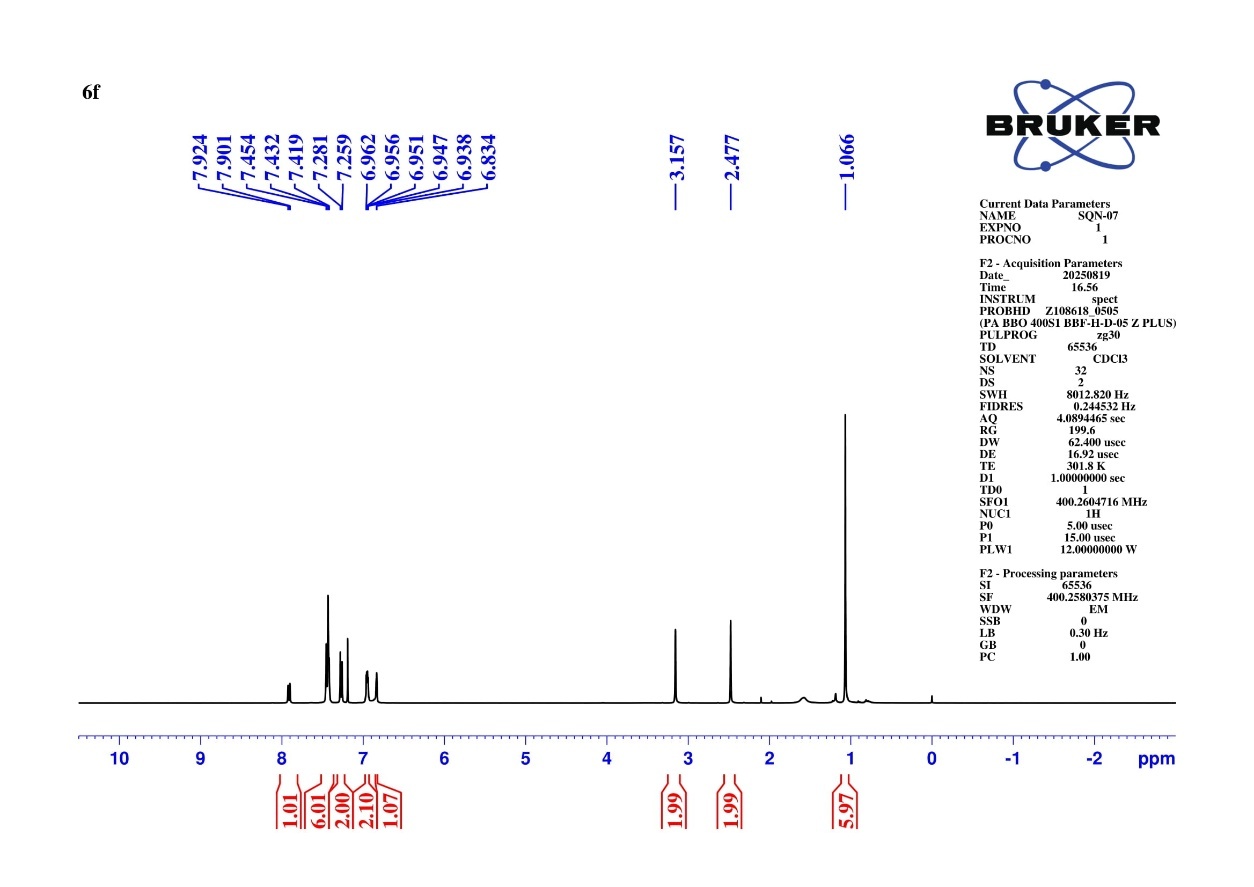
**

**Fig S28** 13C NMR Spectrum of 4-chloro-N-(6,6-dimethyl-8-oxo-9-phenyl-5,6,7,8-tetrahydroacridin-2-yl) benzenesulfonamide **(6f)
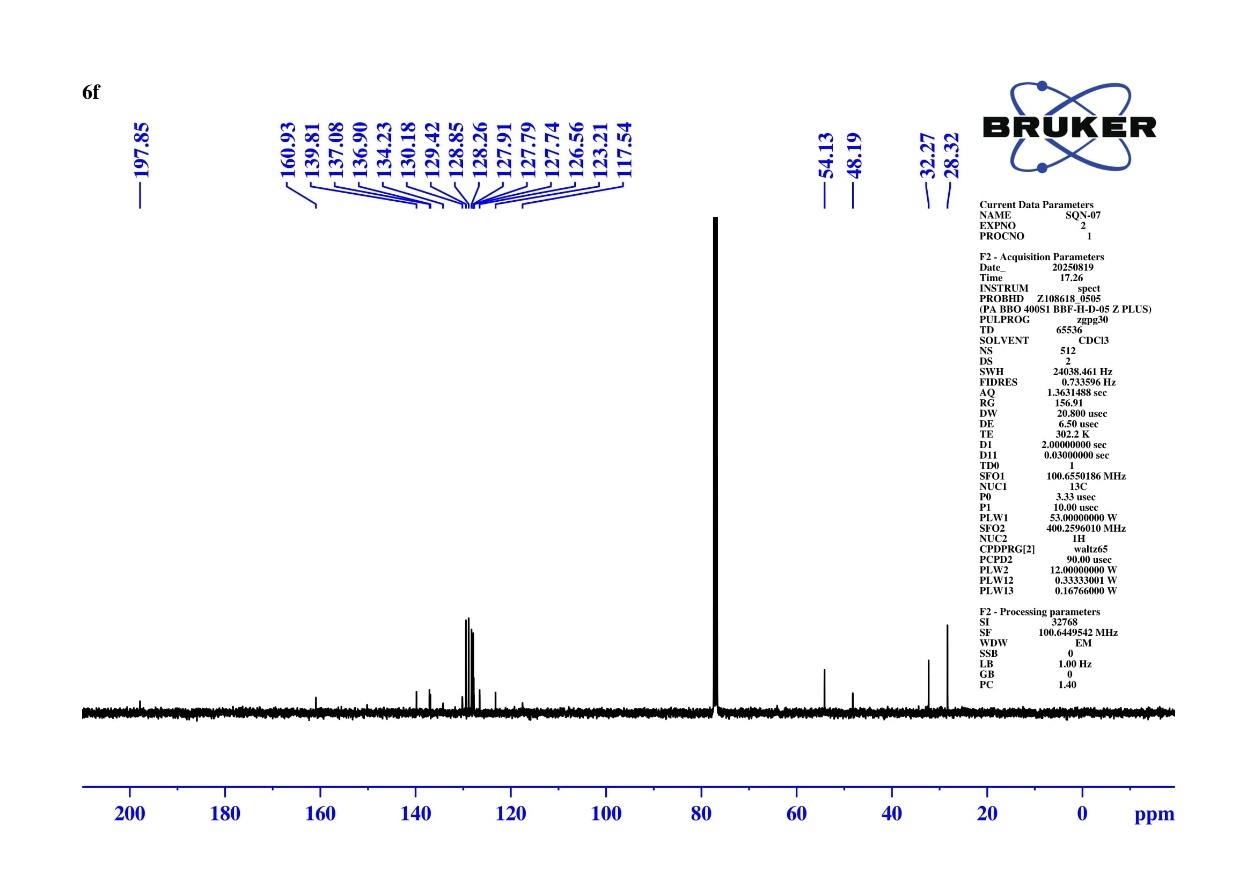
**

**
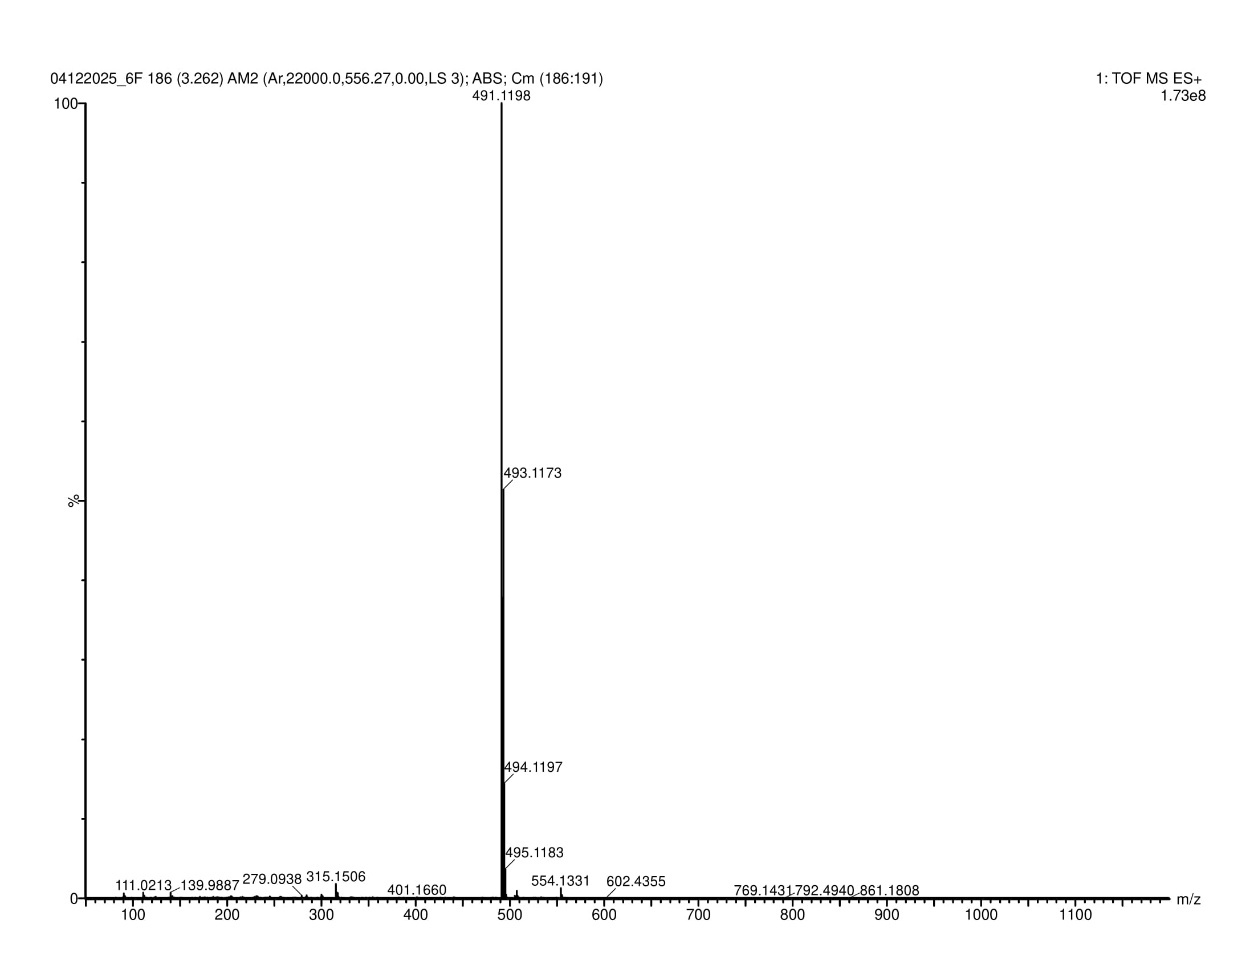
Fig S29** DEPT-135 NMR Spectrum of 4-chloro-N-(6,6-dimethyl-8-oxo-9-phenyl-5,6,7,8-tetrahydroacridin-2-yl) benzenesulfonamide **(6f)**

Calculated Exact Mass = 491.1198

[M+H] = 491.1198

**Fig 30** HRMS Spectrum of 4-chloro-N-(6,6-dimethyl-8-oxo-9-phenyl-5,6,7,8-tetrahydroacridin-2-yl) benzenesulfonamide **(6f)
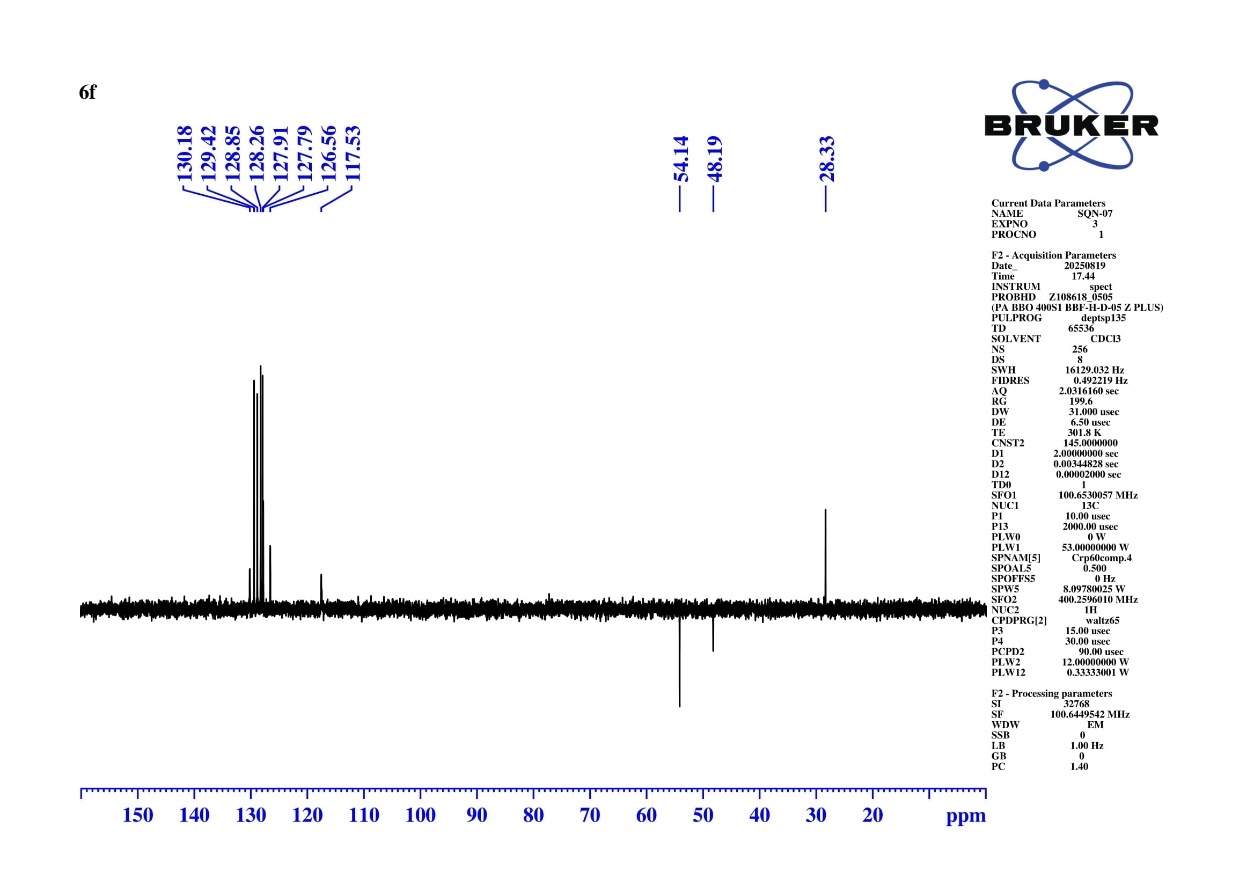
**

**Fig S31** 1H NMR Spectrum of 4-bromo-N-(6,6-dimethyl-8-oxo-9-phenyl-5,6,7,8-tetrahydroacridin-2-yl) benzenesulfonamide **(6g)
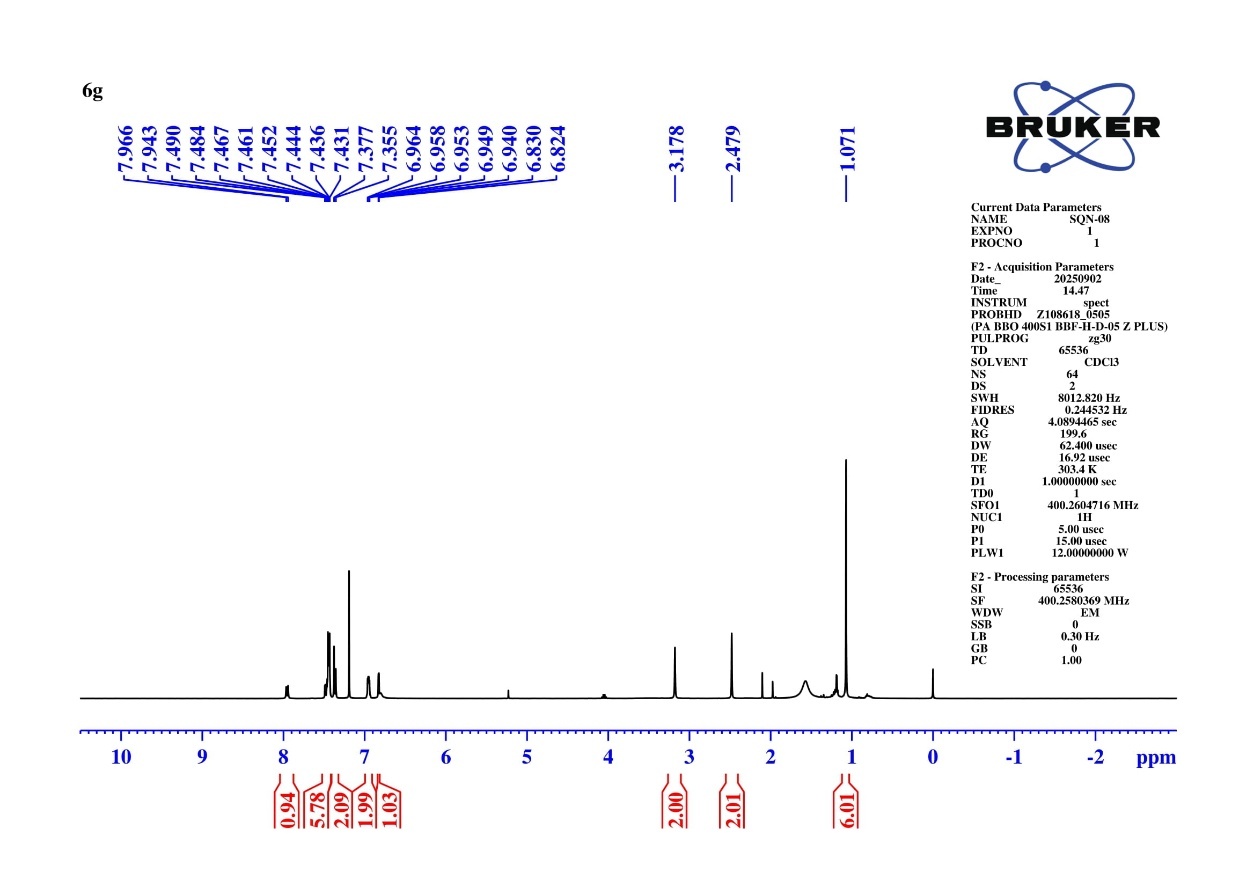
**

**
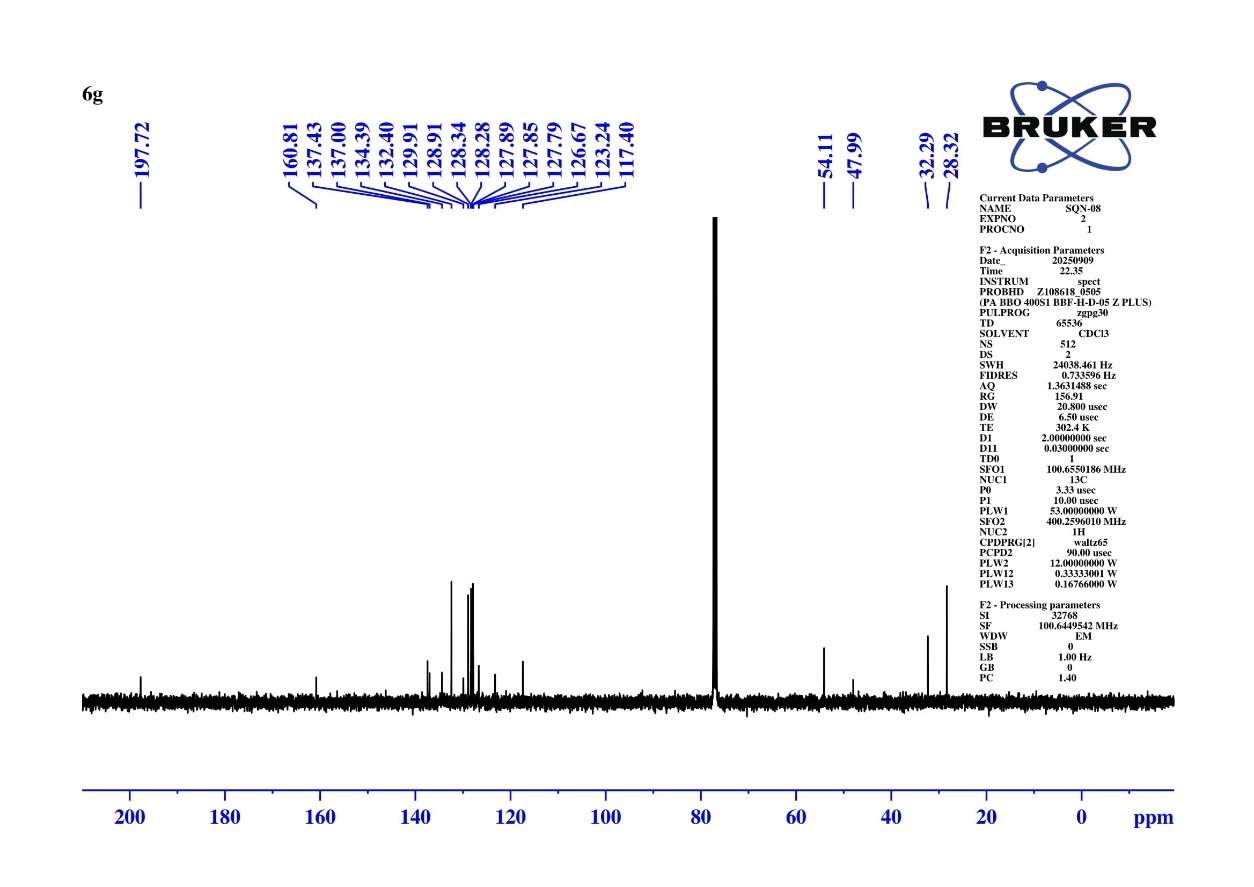
Fig S32** 13C NMR Spectrum of 4-bromo-N-(6,6-dimethyl-8-oxo-9-phenyl-5,6,7,8-tetrahydroacridin-2-yl) benzenesulfonamide **(6g)**

**
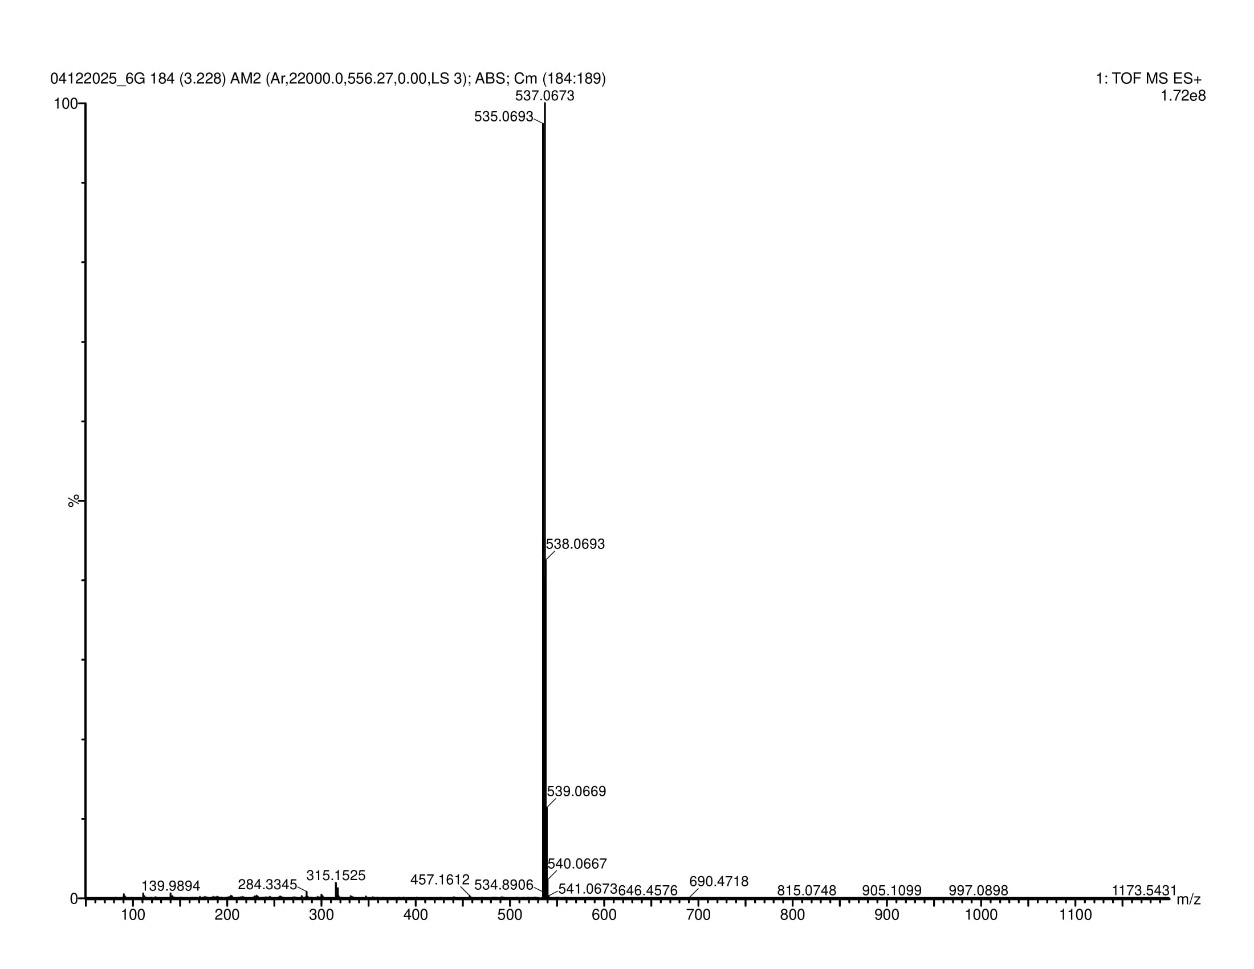

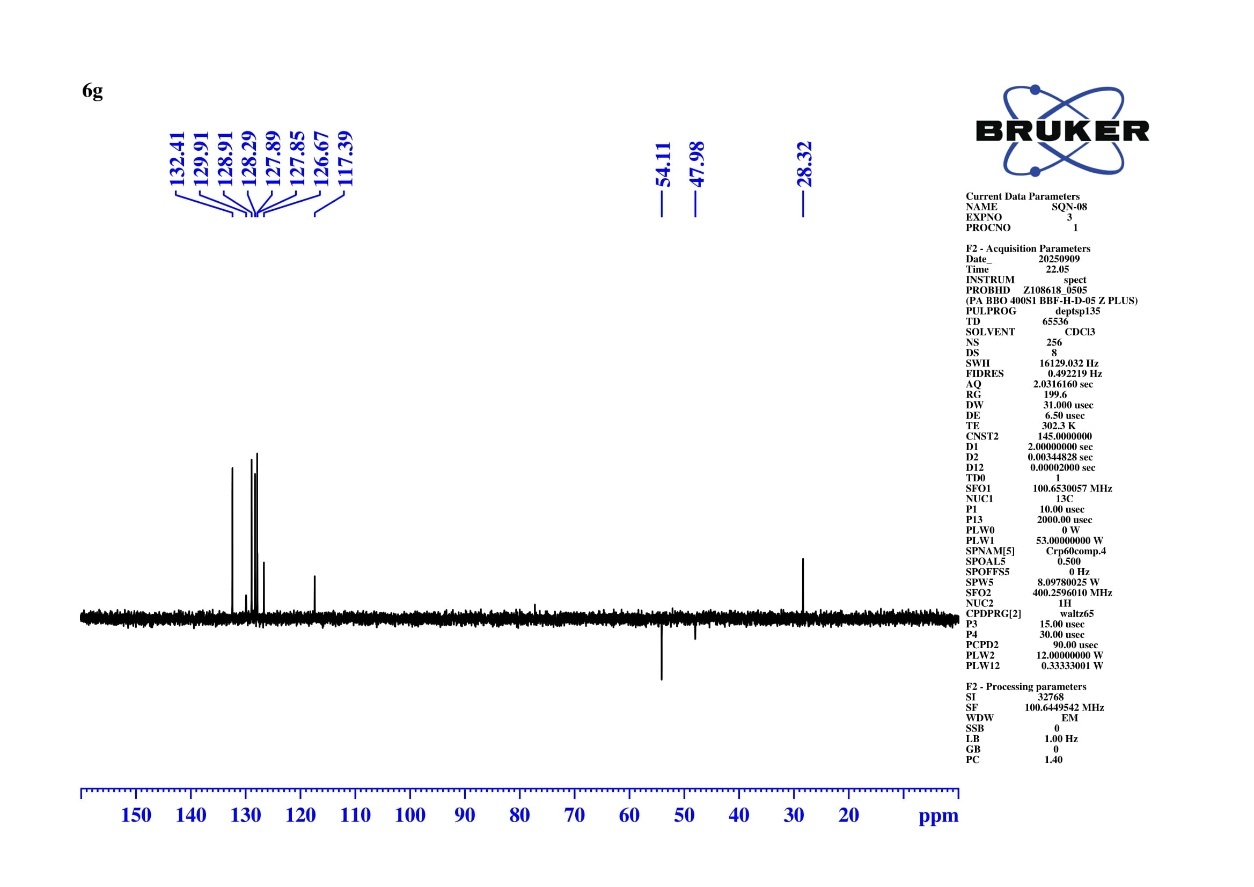
 Fig S33** DEPT-135 NMR Spectrum of 4-bromo-N-(6,6-dimethyl-8-oxo-9-phenyl-5,6,7,8-tetrahydroacridin-2-yl) benzenesulfonamide **(6g)**

Calculated Exact Mass = 535.0691

[M+H] = 535.0693

**Fig S34** HRMS Spectrum of 4-bromo-N-(6,6-dimethyl-8-oxo-9-phenyl-5,6,7,8-tetrahydroacridin-2-yl) benzenesulfonamide **(6g)**

**Fig S35** 1H NMR Spectrum N-(6,6-dimethyl-8-oxo-9-phenyl-5,6,7,8-tetrahydroacridin-2-yl)-2-nitrobenzenesulfonamide **(6h)**


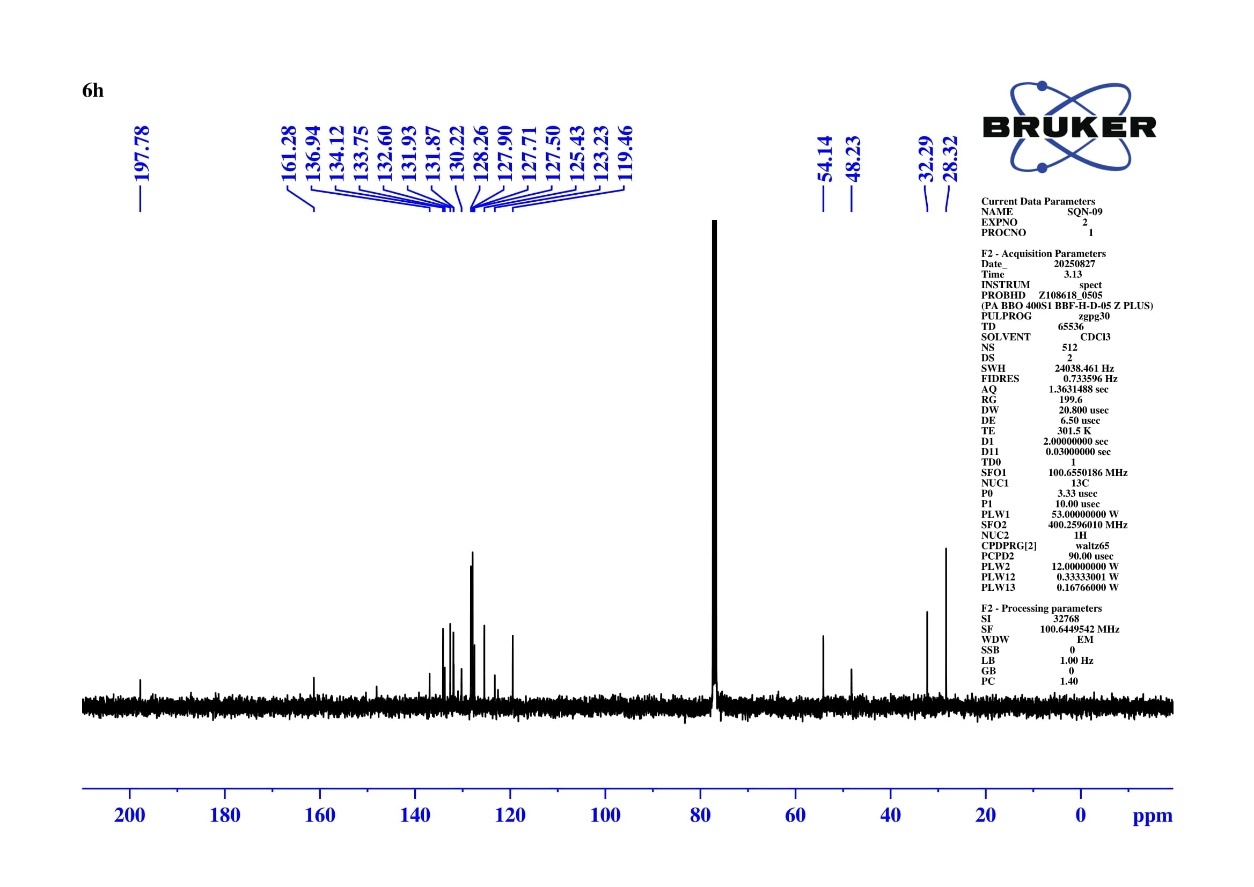
**Fig S36** 13C NMR Spectrum N-(6,6-dimethyl-8-oxo-9-phenyl-5,6,7,8-tetrahydroacridin-2-yl)-2-nitrobenzenesulfonamide **(6h)**
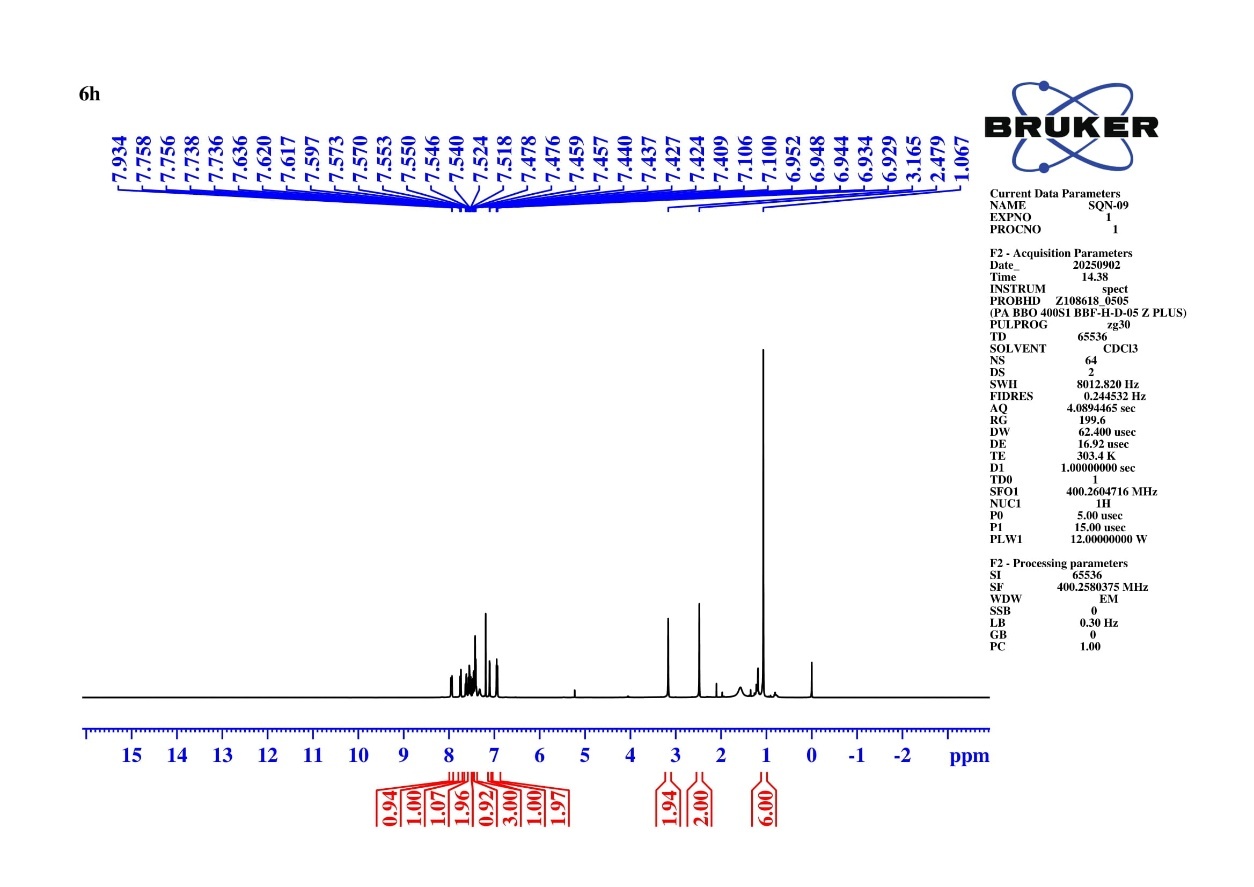


**Fig 37** DEPT-135 NMR Spectrum N-(6,6-dimethyl-8-oxo-9-phenyl-5,6,7,8-tetrahydroacridin-2-yl)-2-nitrobenzenesulfonamide **(6h)**
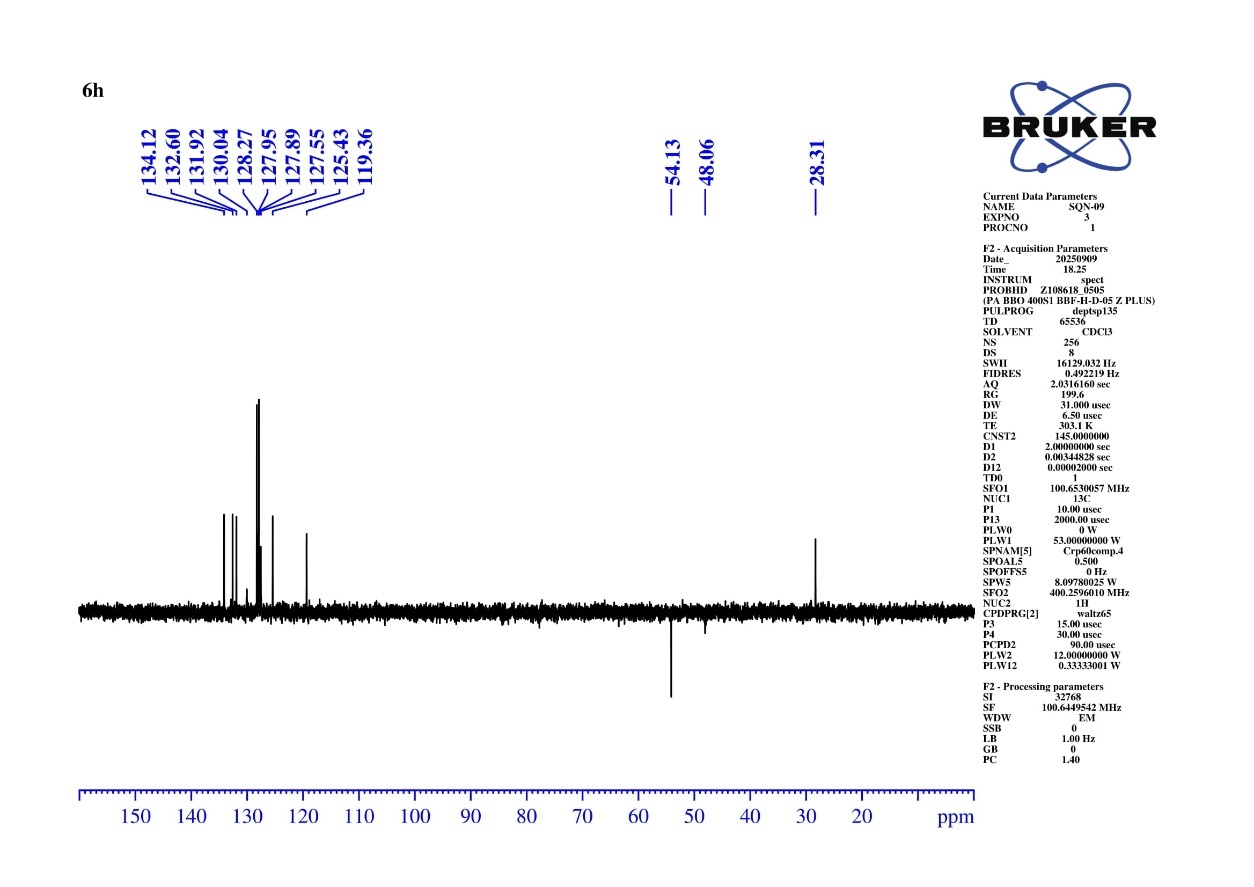


Calculated Exact Mass = 502.1436

[M+H] = 502.1437

**Fig** HRMS Spectrum N-(6,6-dimethyl-8-oxo-9-phenyl-5,6,7,8-tetrahydroacridin-2-yl)-2-nitrobenzenesulfonamide **(6h)**
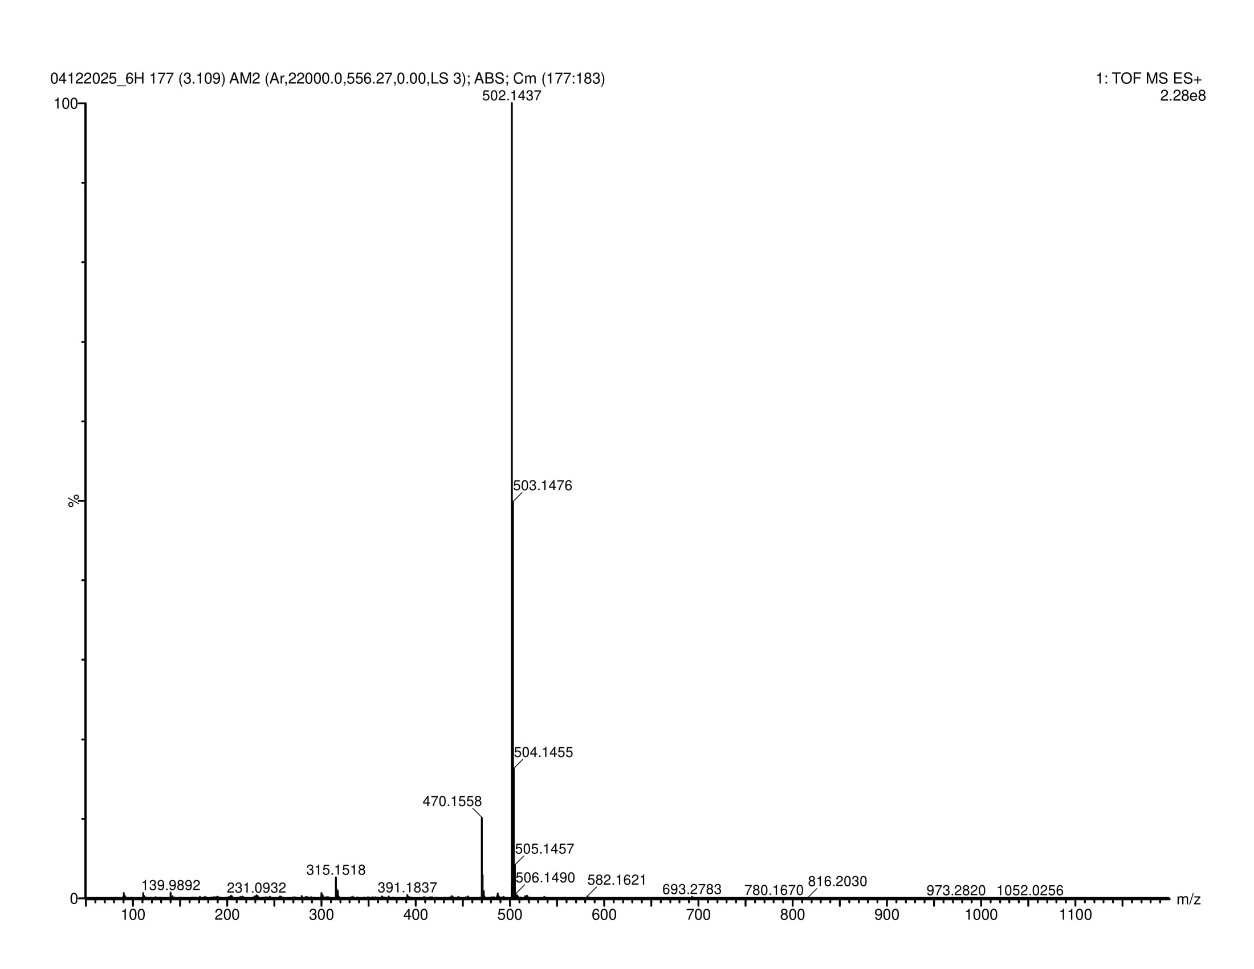


**Fig S38** 1H NMR Spectrum N-(6,6-dimethyl-8-oxo-9-phenyl-5,6,7,8-tetrahydroacridin-2-yl)-4-iodobenzenesulfonamide **(6i)**


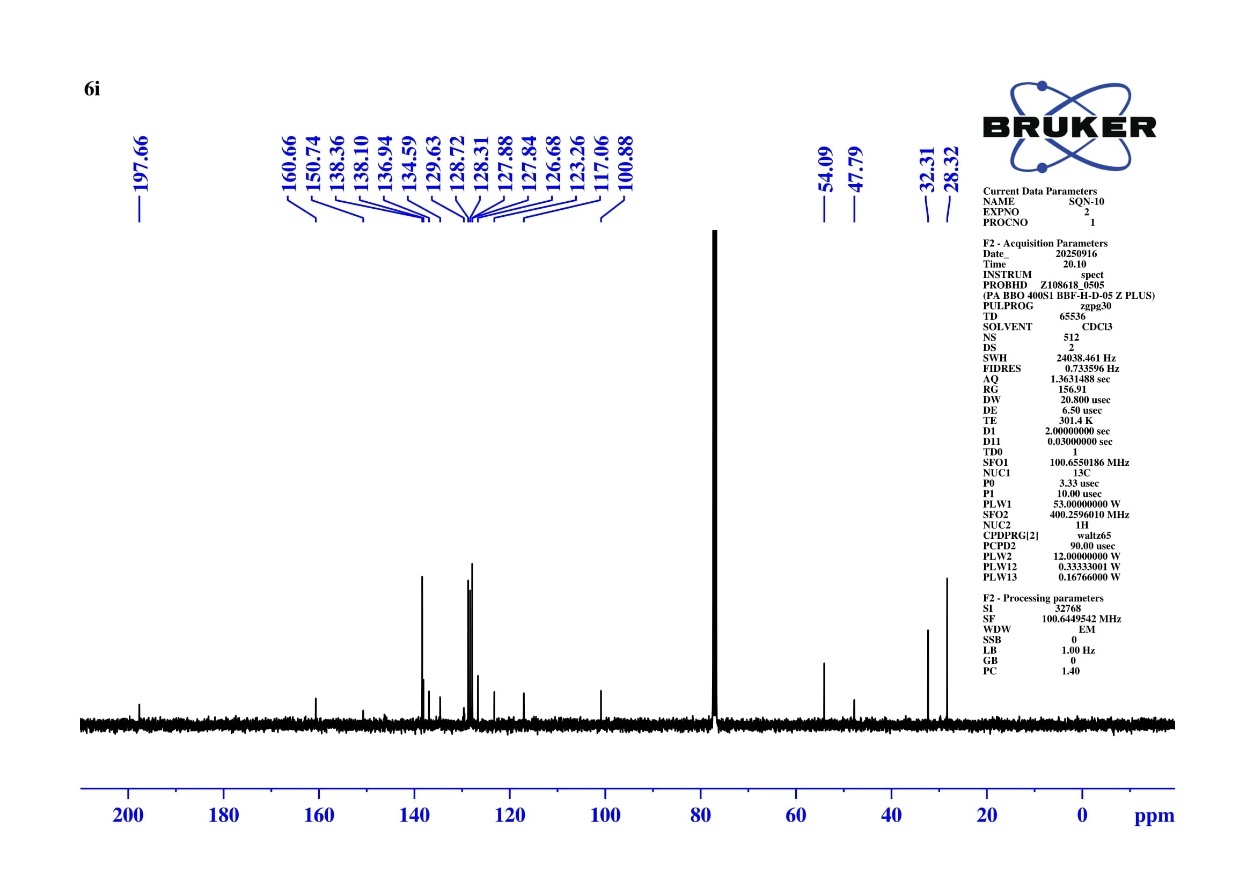


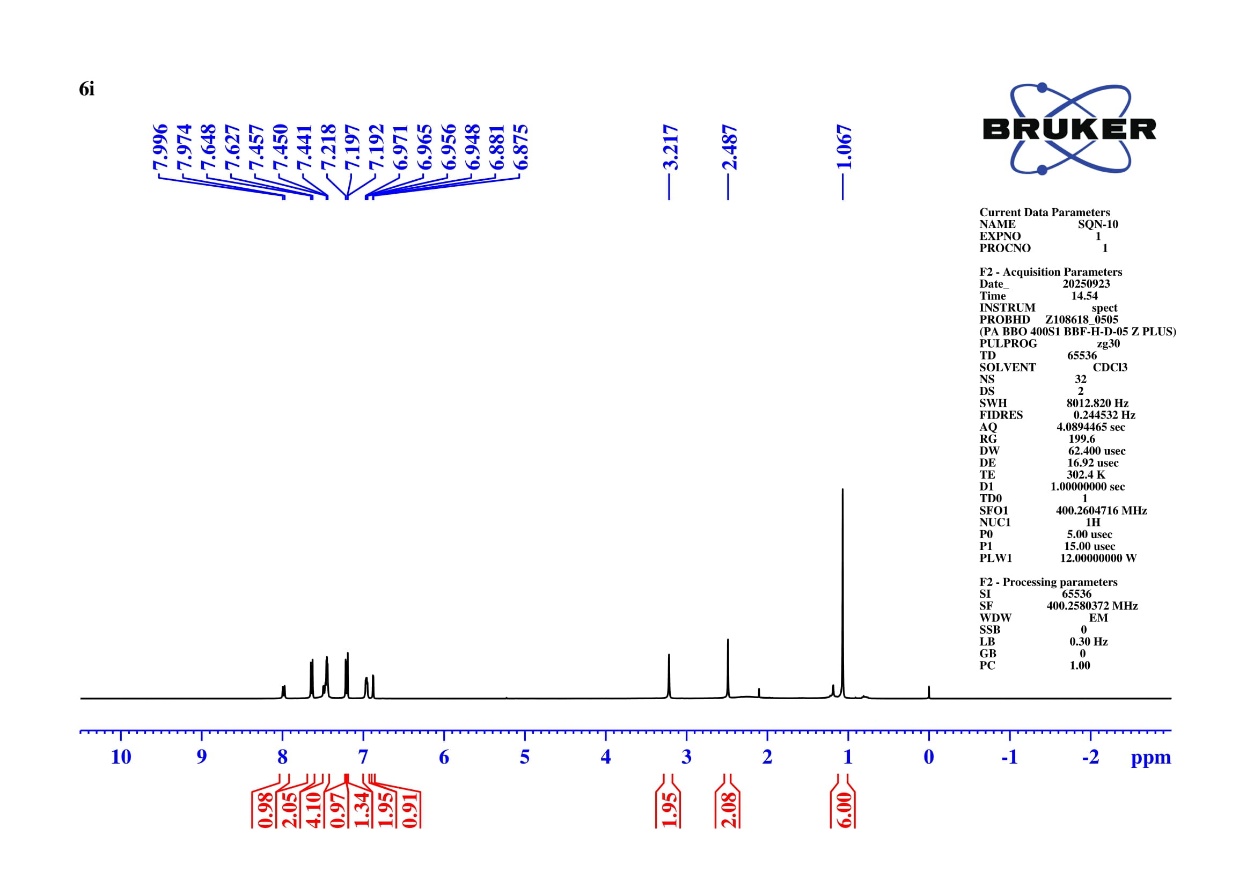
 **Fig S39** 13C NMR Spectrum N-(6,6-dimethyl-8-oxo-9-phenyl-5,6,7,8-tetrahydroacridin-2-yl)-4-iodobenzenesulfonamide **(6i)**

**Fig S40** DEPT-135 NMR Spectrum N-(6,6-dimethyl-8-oxo-9-phenyl-5,6,7,8-tetrahydroacridin-2-yl)-4-iodobenzenesulfonamide **(6i)**
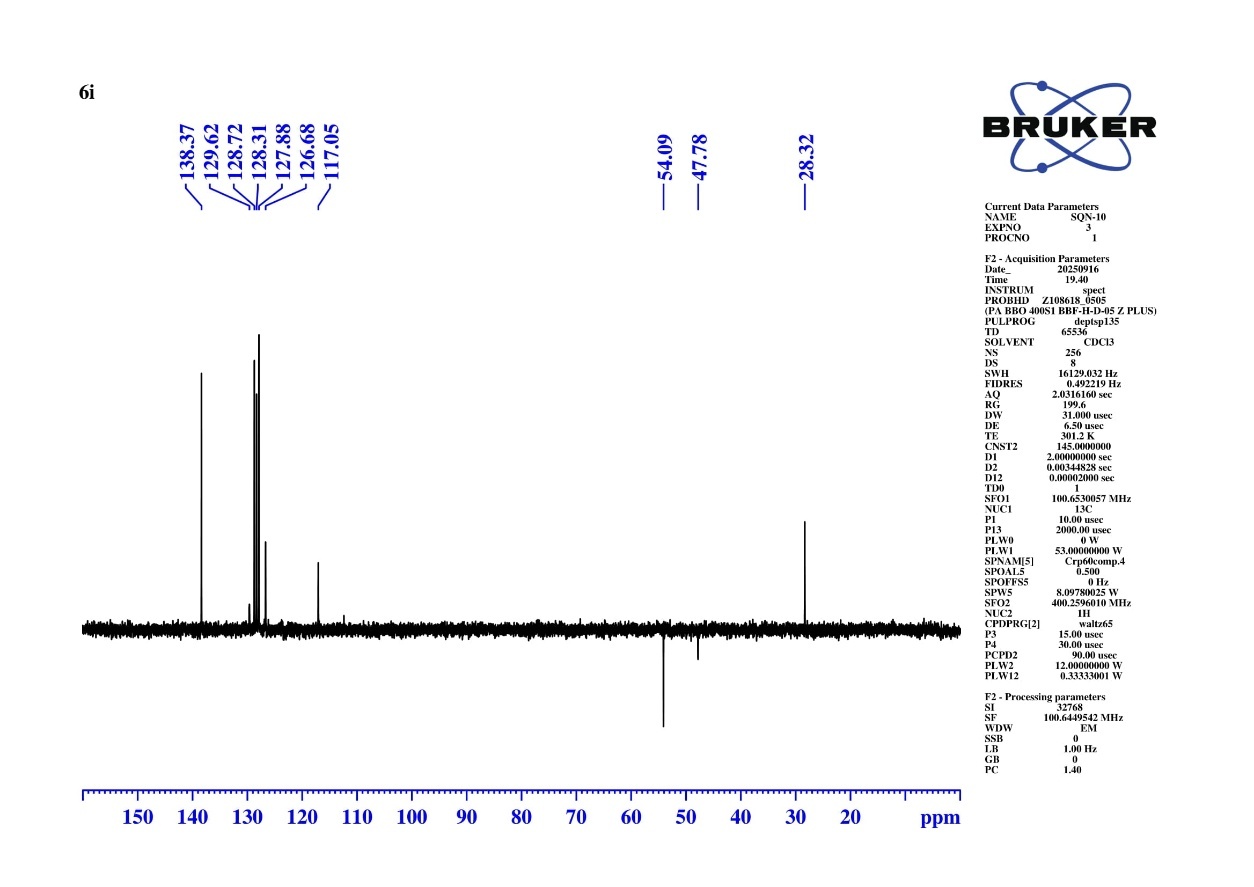


Calculated Exact Mass = 583.0552

[M+H] = 583.0551

**Fig S41** HRMS Spectrum N-(6,6-dimethyl-8-oxo-9-phenyl-5,6,7,8-tetrahydroacridin-2-yl)-4-iodobenzenesulfonamide **(6i)**
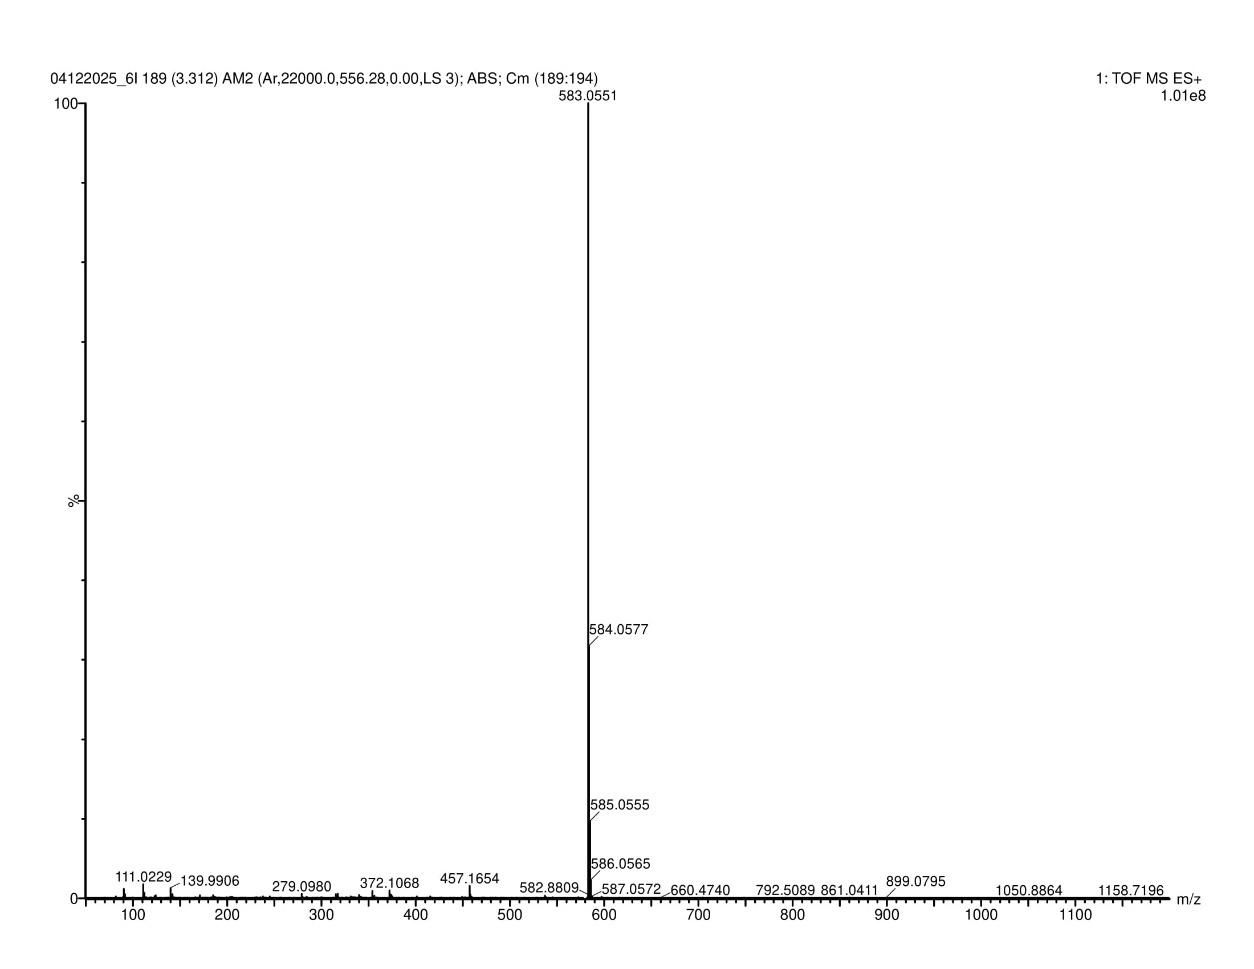


**Fig S42** 1H NMR Spectrum of 4-cyano-N-(6,6-dimethyl-8-oxo-9-phenyl-5,6,7,8-tetrahydroacridin-2-yl) benzenesulfonamide **(6j)**
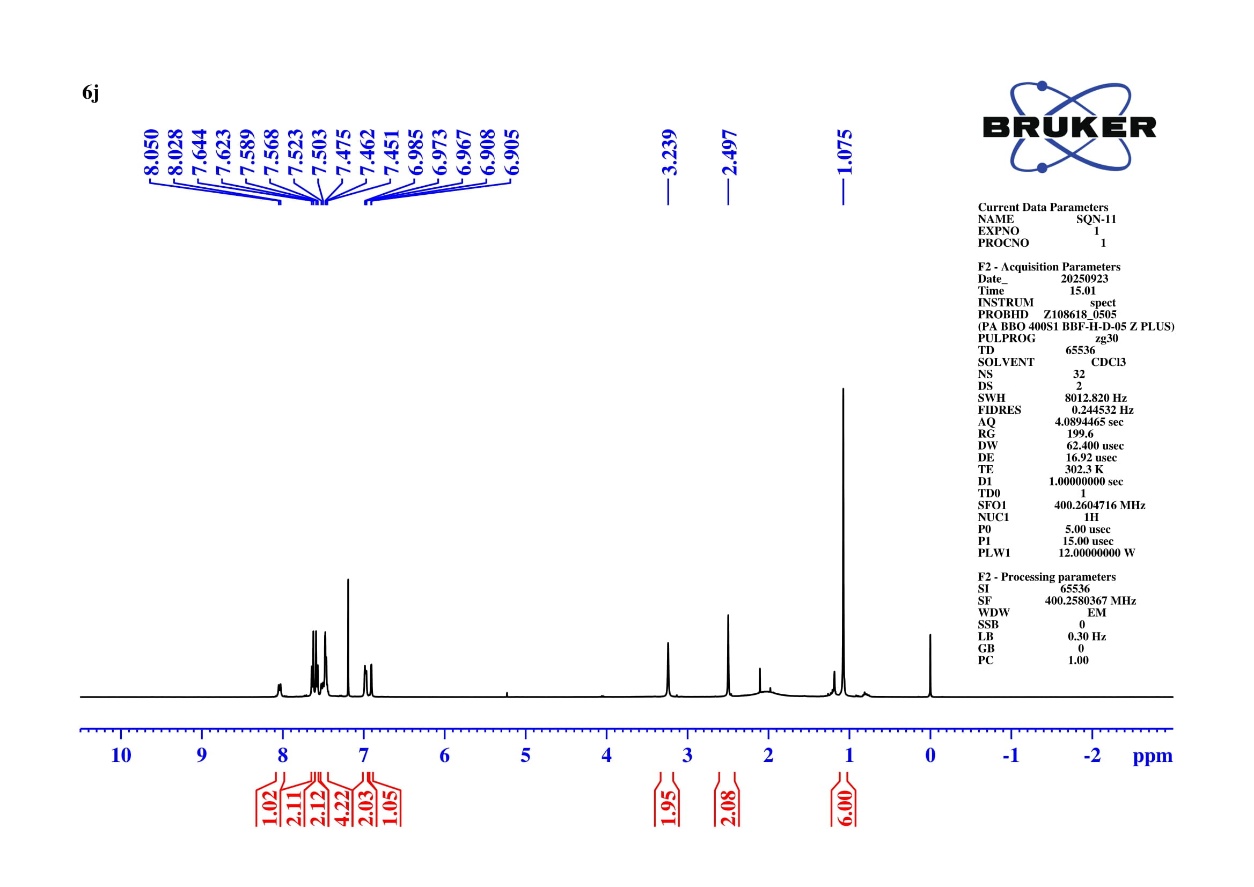


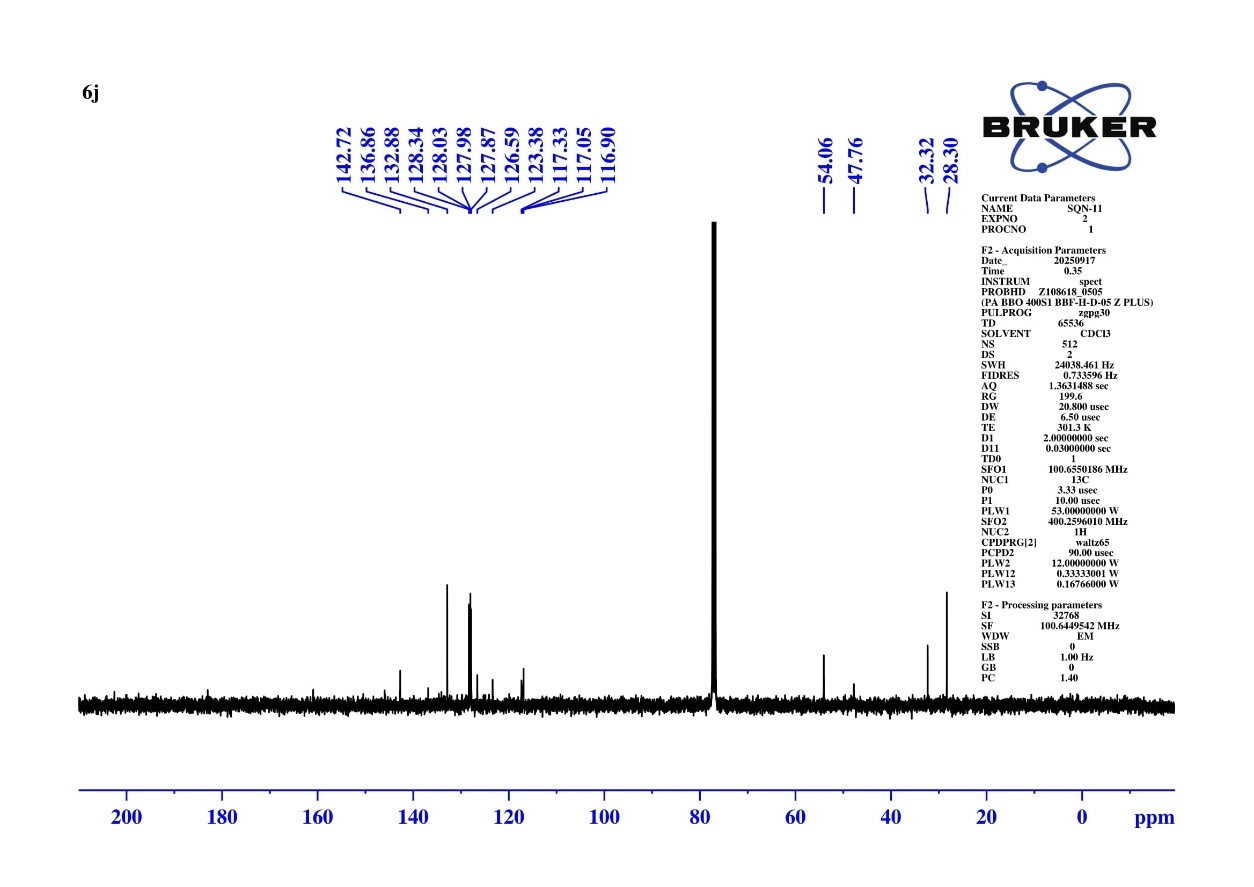
**Fig S43** 13C NMR Spectrum of 4-cyano-N-(6,6-dimethyl-8-oxo-9-phenyl-5,6,7,8-tetrahydroacridin-2-yl) benzenesulfonamide **(6j)**
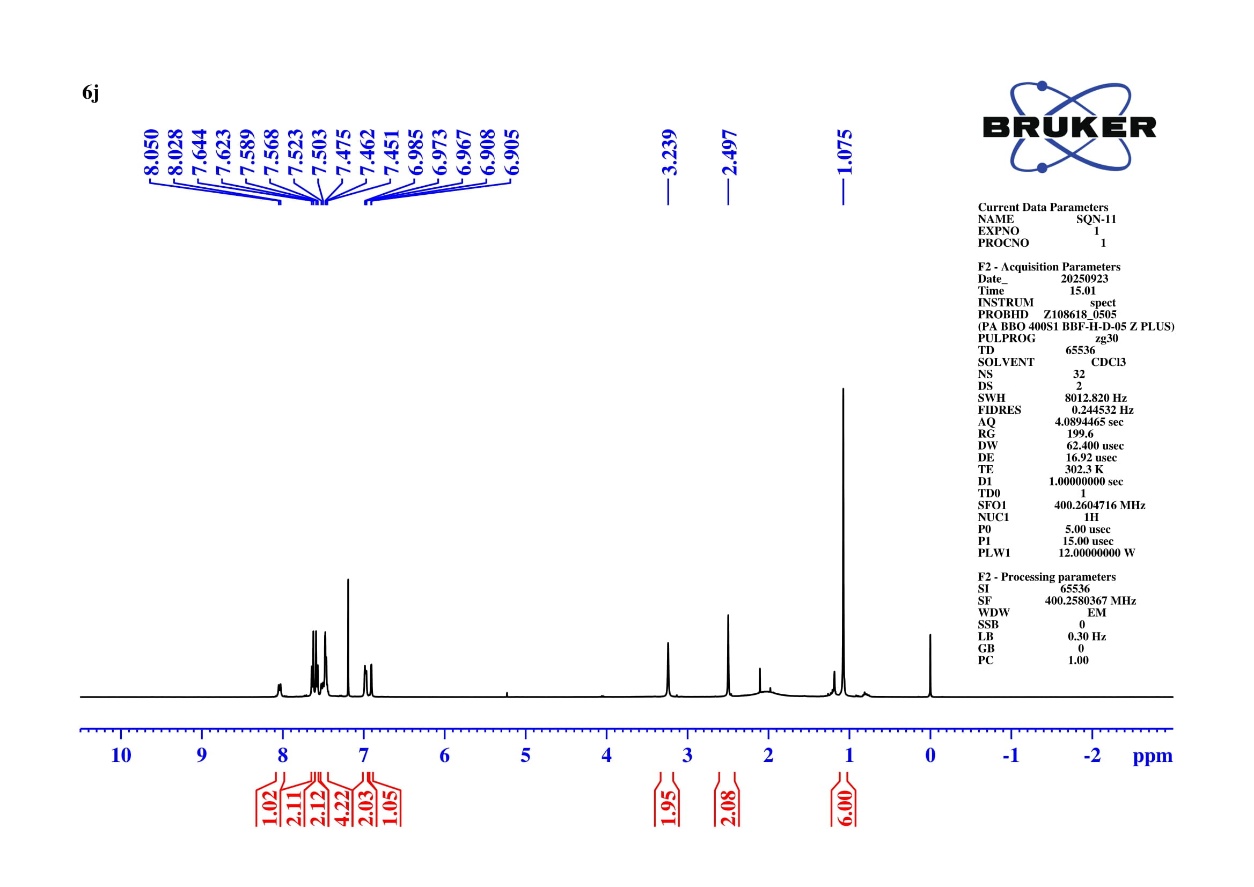


**Fig S44** DEPT-135 NMR Spectrum of 4-cyano-N-(6,6-dimethyl-8-oxo-9-phenyl-5,6,7,8-tetrahydroacridin-2-yl) benzenesulfonamide **(6j)**

Calculated Exact Mass = 482.1538

[M+H] = 482.1537

**Fig S45** HRMS Spectrum of 4-cyano-N-(6,6-dimethyl-8-oxo-9-phenyl-5,6,7,8-tetrahydroacridin-2-yl) benzenesulfonamide **(6j)**
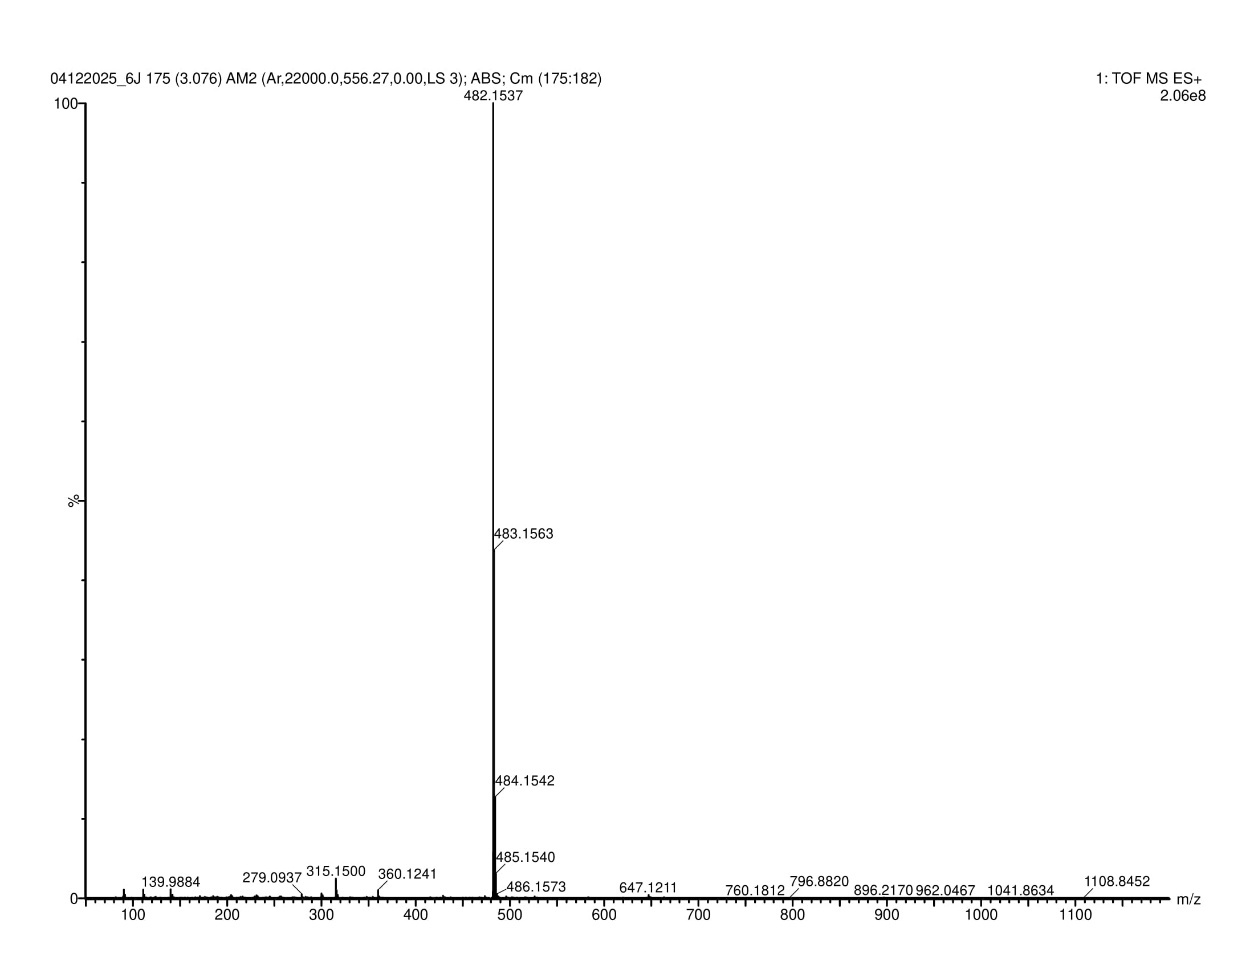

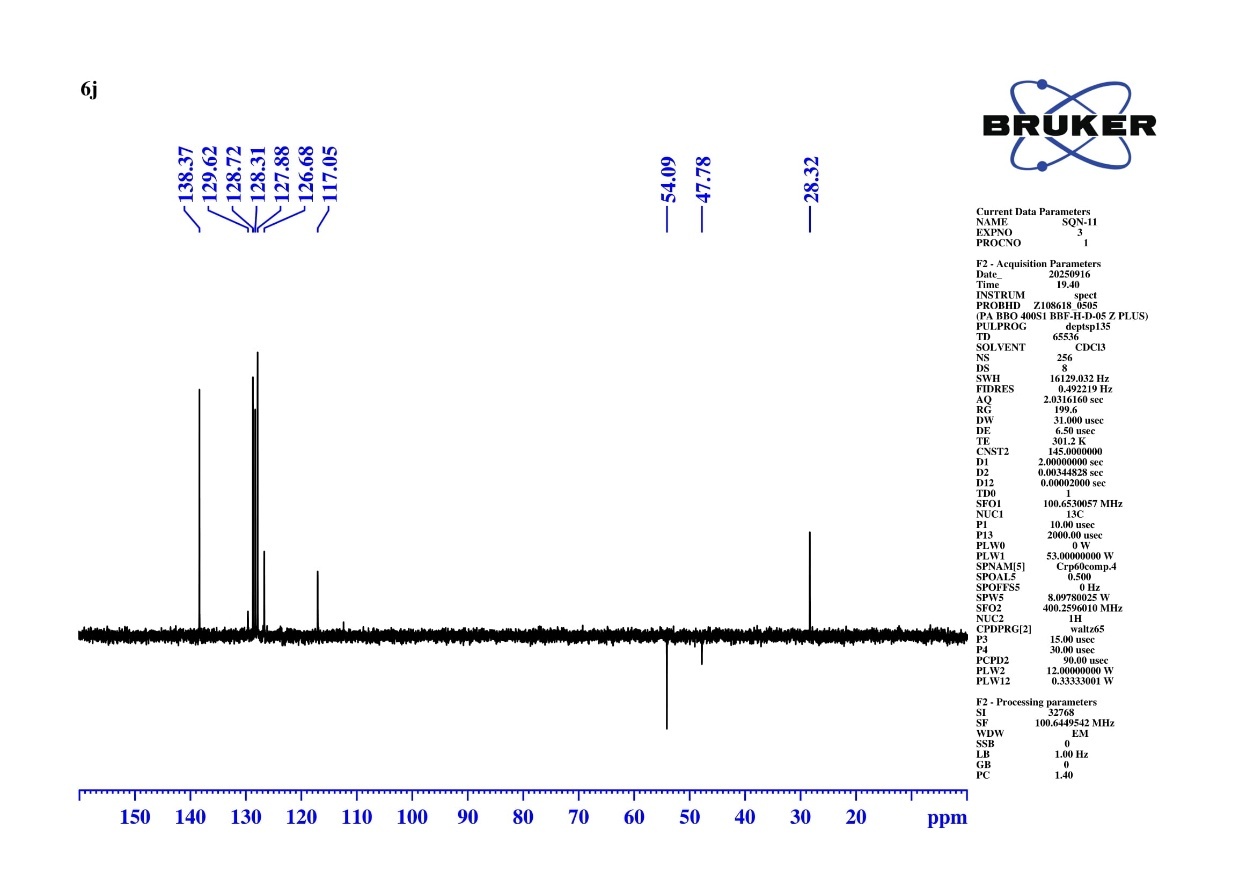


**Fig S46** 1H NMR Spectrum of 4-methyl-N-(8-oxo-9-phenyl-5,6,7,8-tetrahydroacridin-2-yl) benzenesulfonamide **(10a)**
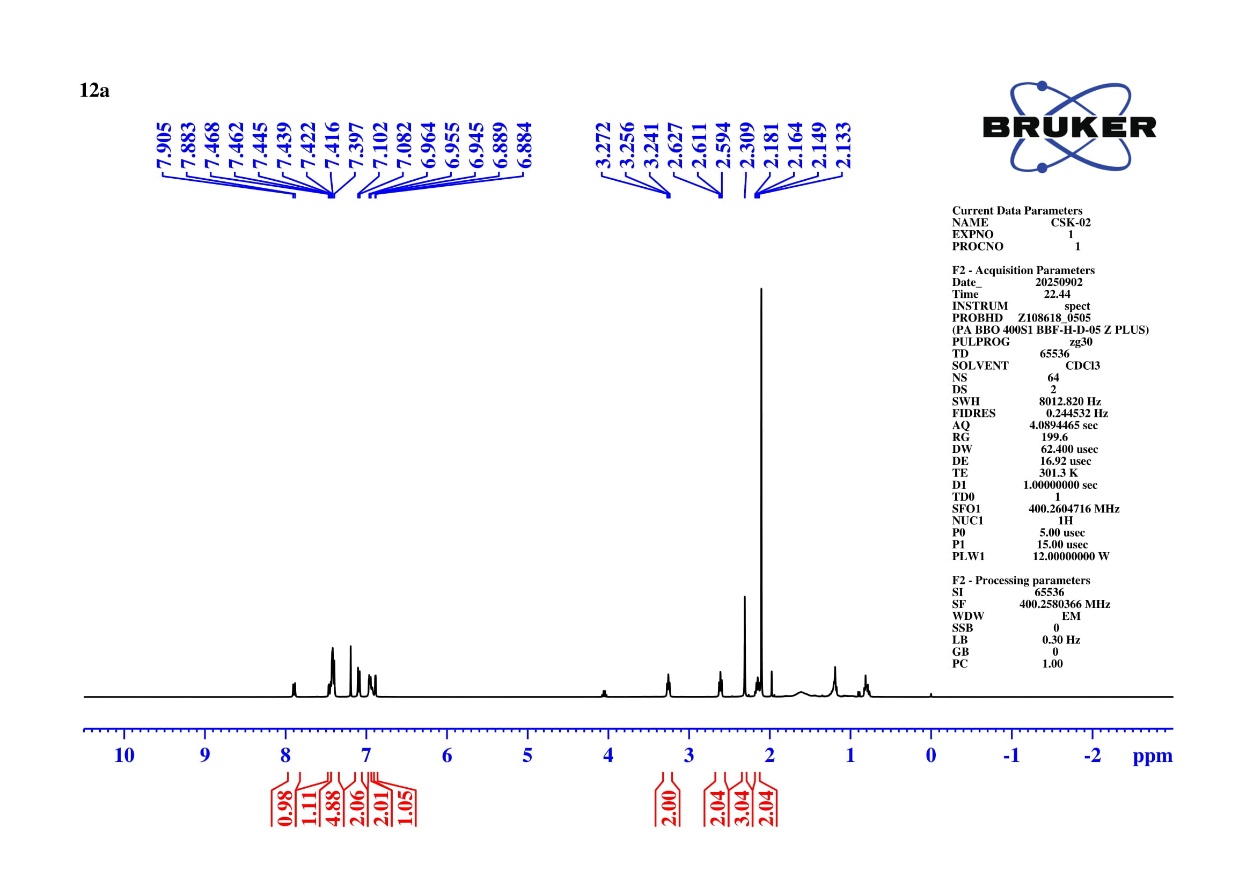


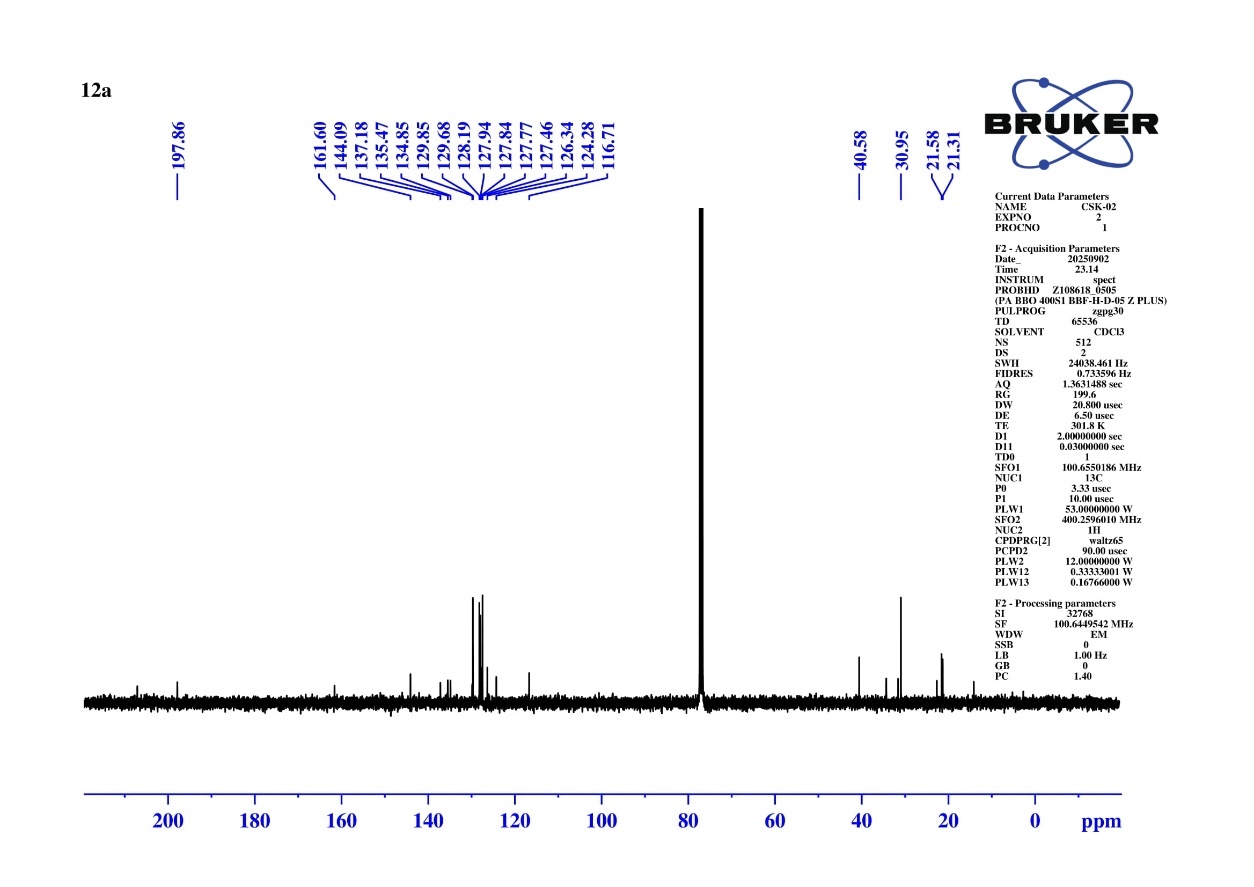
**Fig S47** 13C NMR Spectrum of 4-methyl-N-(8-oxo-9-phenyl-5,6,7,8-tetrahydroacridin-2-yl) benzenesulfonamide **(10a)**

**Fig S48** DEPT-135 Spectrum of 4-methyl-N-(8-oxo-9-phenyl-5,6,7,8-tetrahydroacridin-2-yl) benzenesulfonamide **(10a)
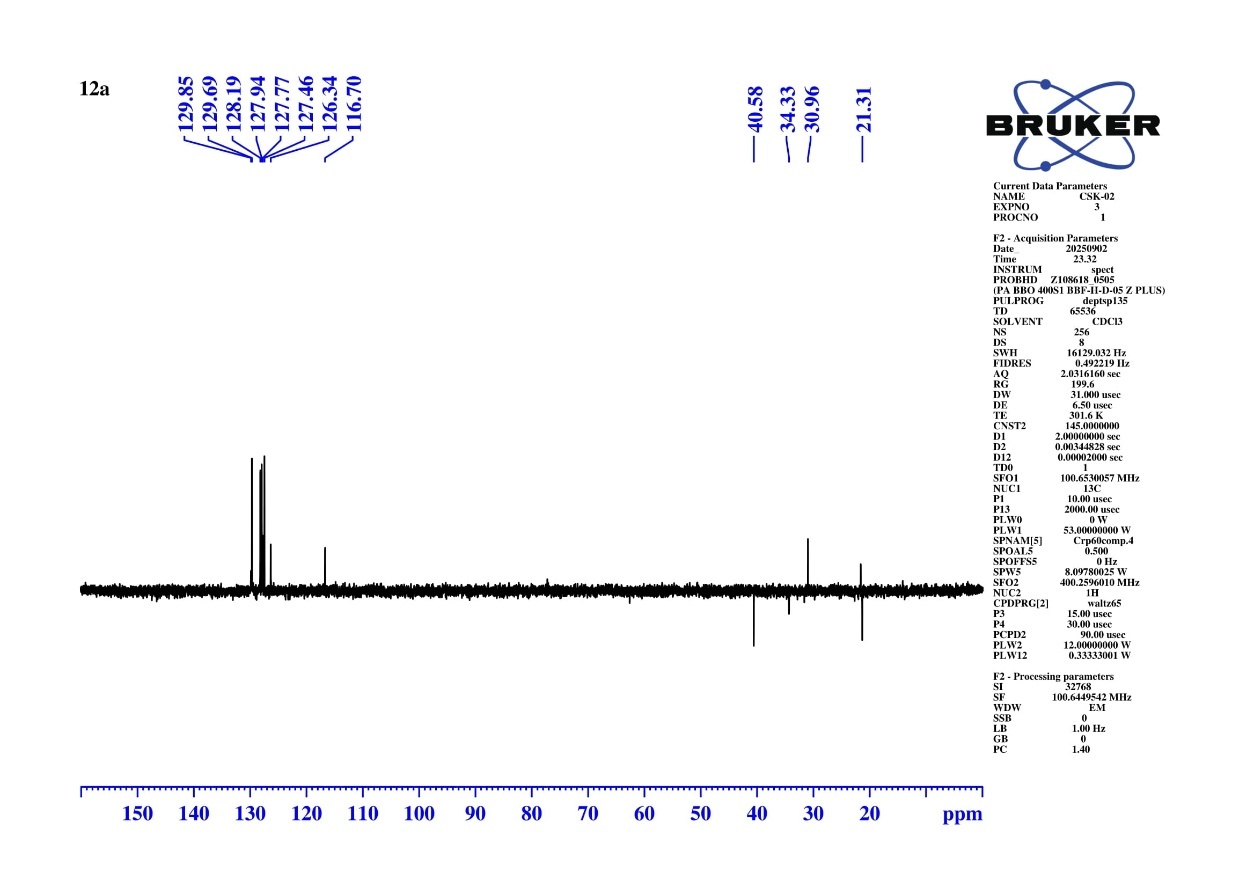
**

Calculated Exact Mass = 443.1429

[M+H] = 443.1429

**Fig S49** HRMS Spectrum of 4-methyl-N-(8-oxo-9-phenyl-5,6,7,8-tetrahydroacridin-2-yl) benzenesulfonamide **(10a)
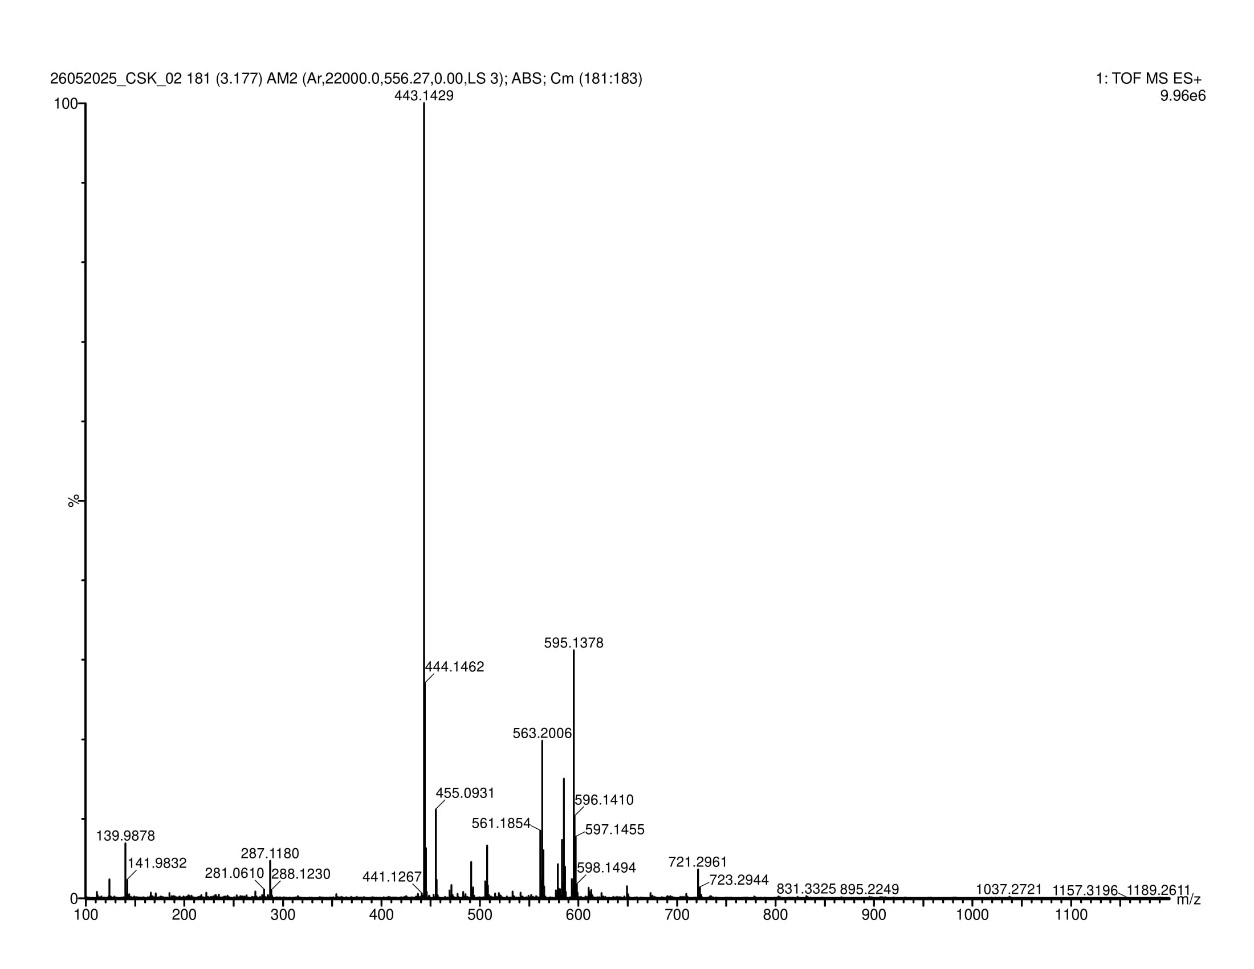
**

**
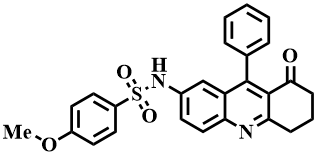
Fig S50** 1H NMR Spectrum of 4-methoxy-N-(8-oxo-9-phenyl-5,6,7,8-tetrahydroacridin-2-yl) benzenesulfonamide **(10b)
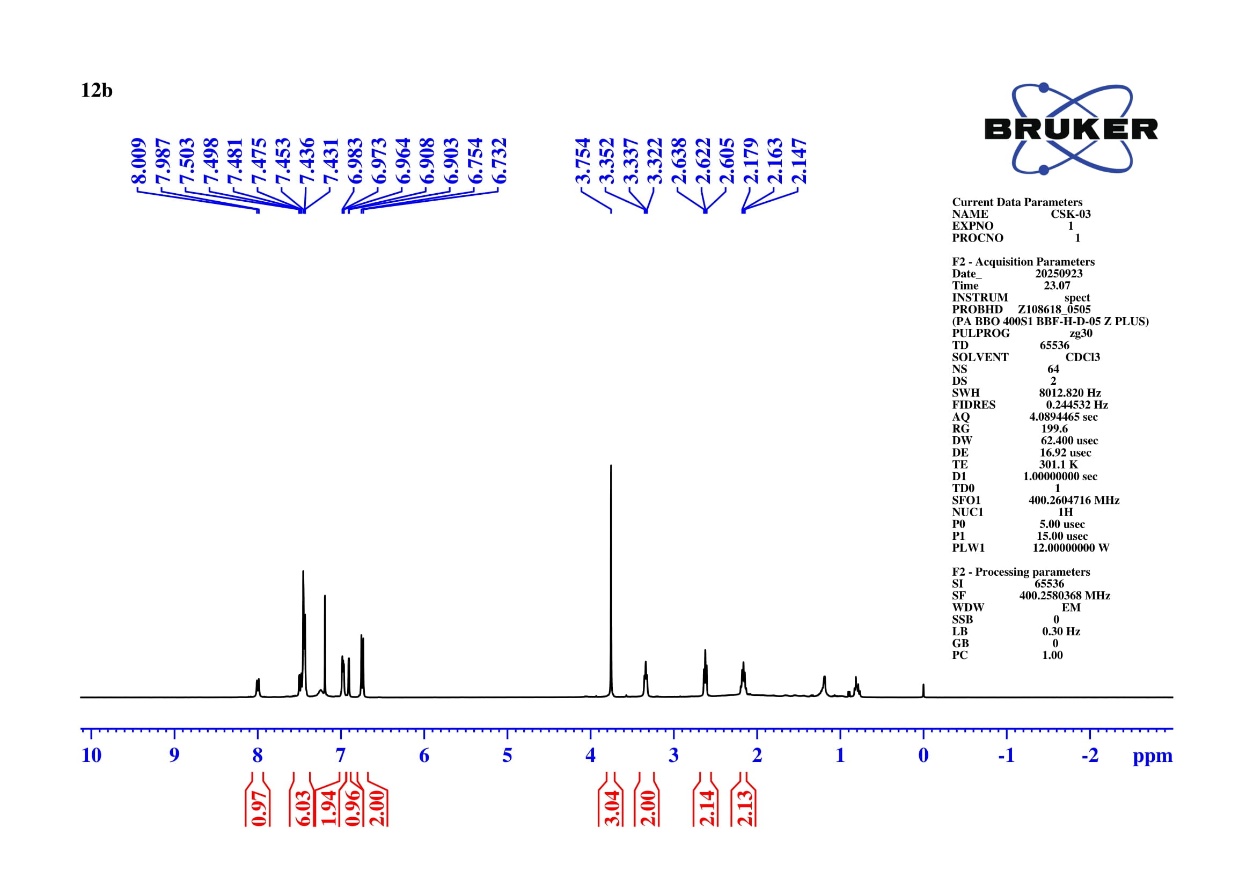
**

**
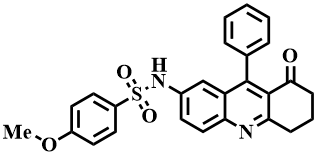

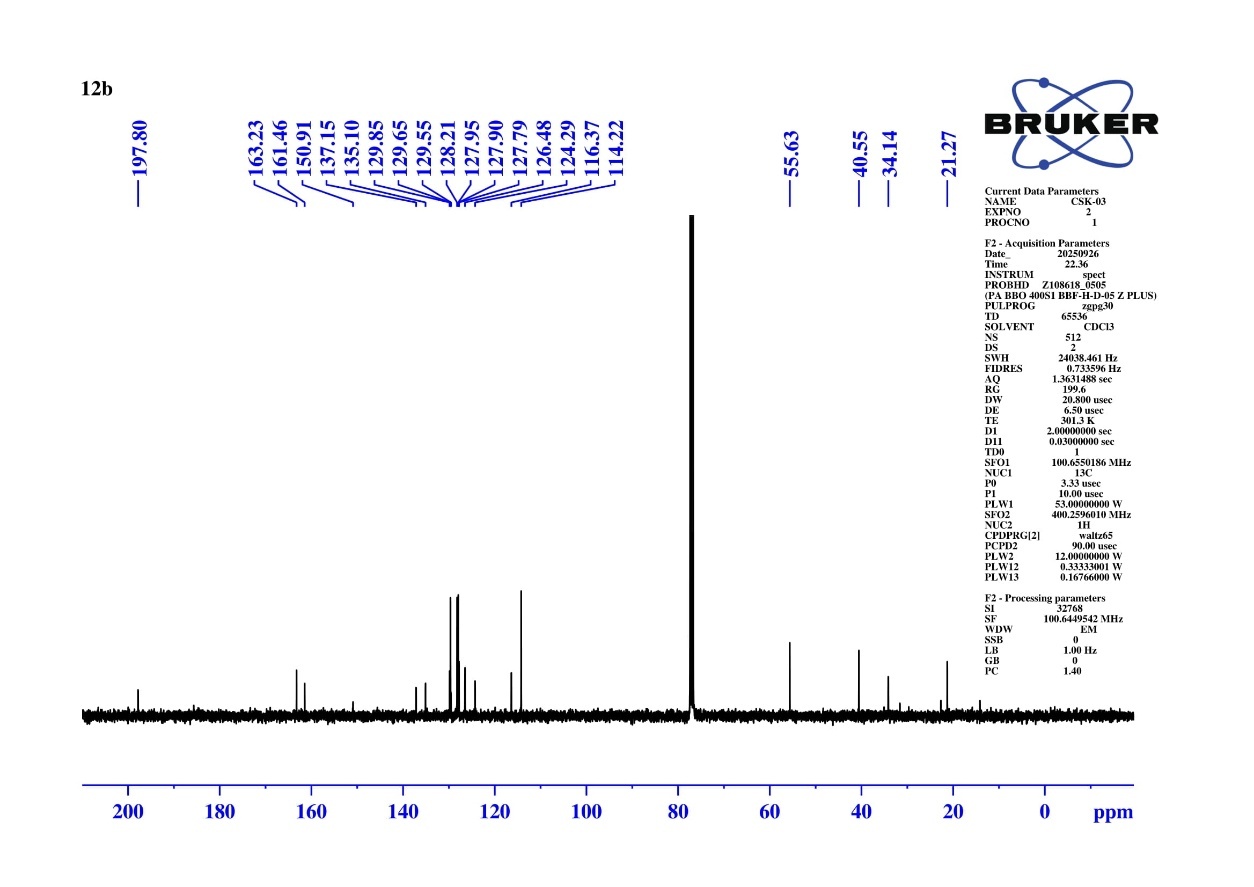
**

**Fig S51** 13C NMR Spectrum of 4-methoxy-N-(8-oxo-9-phenyl-5,6,7,8-tetrahydroacridin-2-yl) benzenesulfonamide **(10b)**

**
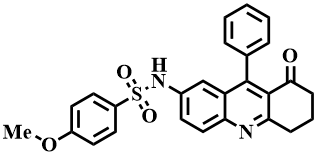

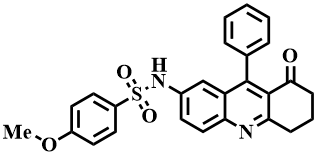

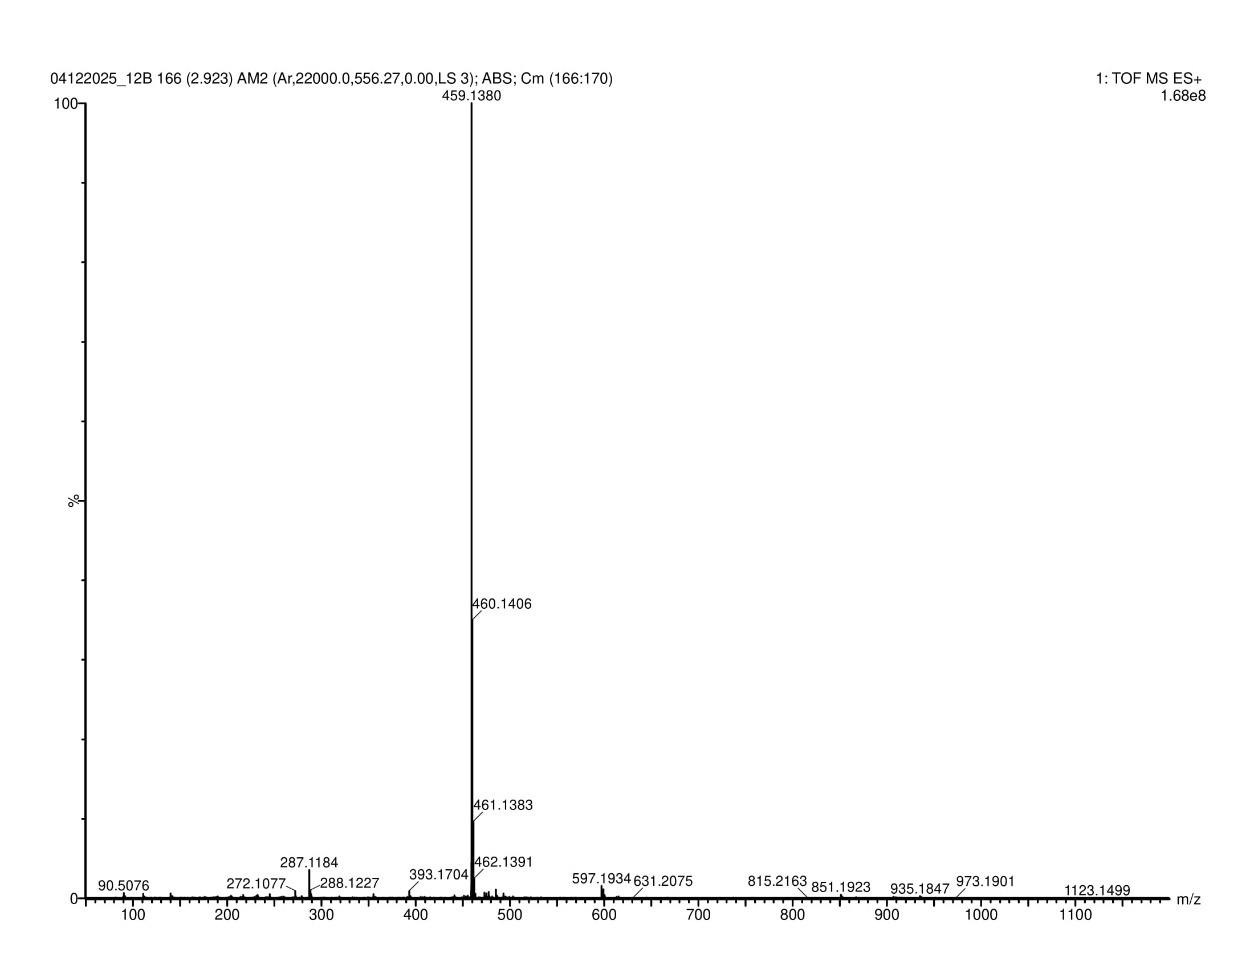
Fig S52** DEPT-135 NMR Spectrum of 4-methoxy-N-(8-oxo-9-phenyl-5,6,7,8-tetrahydroacridin-2-yl) benzenesulfonamide **(10b)
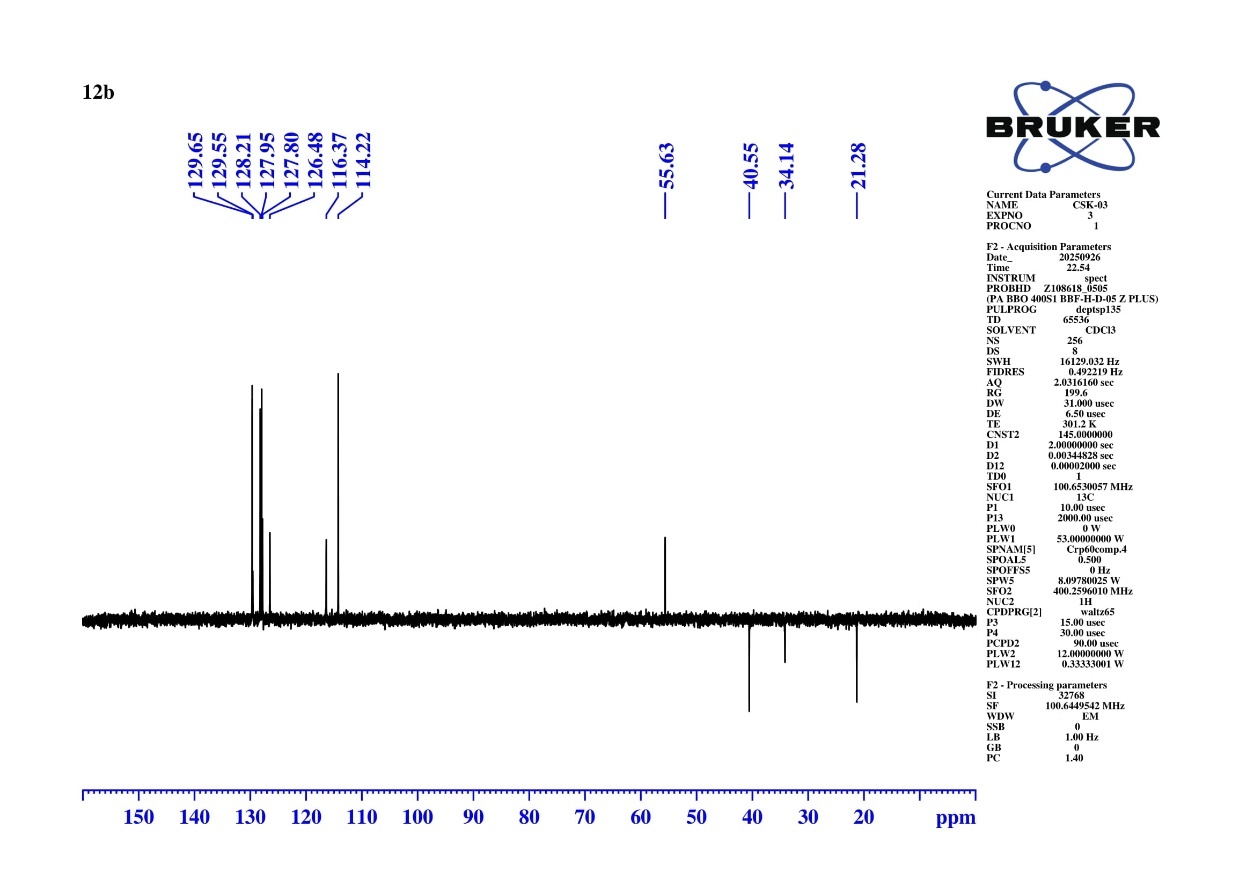
**

Calculated Exact Mass = 459.1378

[M+H] = 459.1380

**Fig S53** HMRS Spectrum of 4-methoxy-N-(8-oxo-9-phenyl-5,6,7,8-tetrahydroacridin-2-yl) benzenesulfonamide **(10b)**

**Fig S54** 1H NMR Spectrum of N-(8-oxo-9-phenyl-5,6,7,8-tetrahydroacridin-2-yl) benzenesulfonamide **(10c)
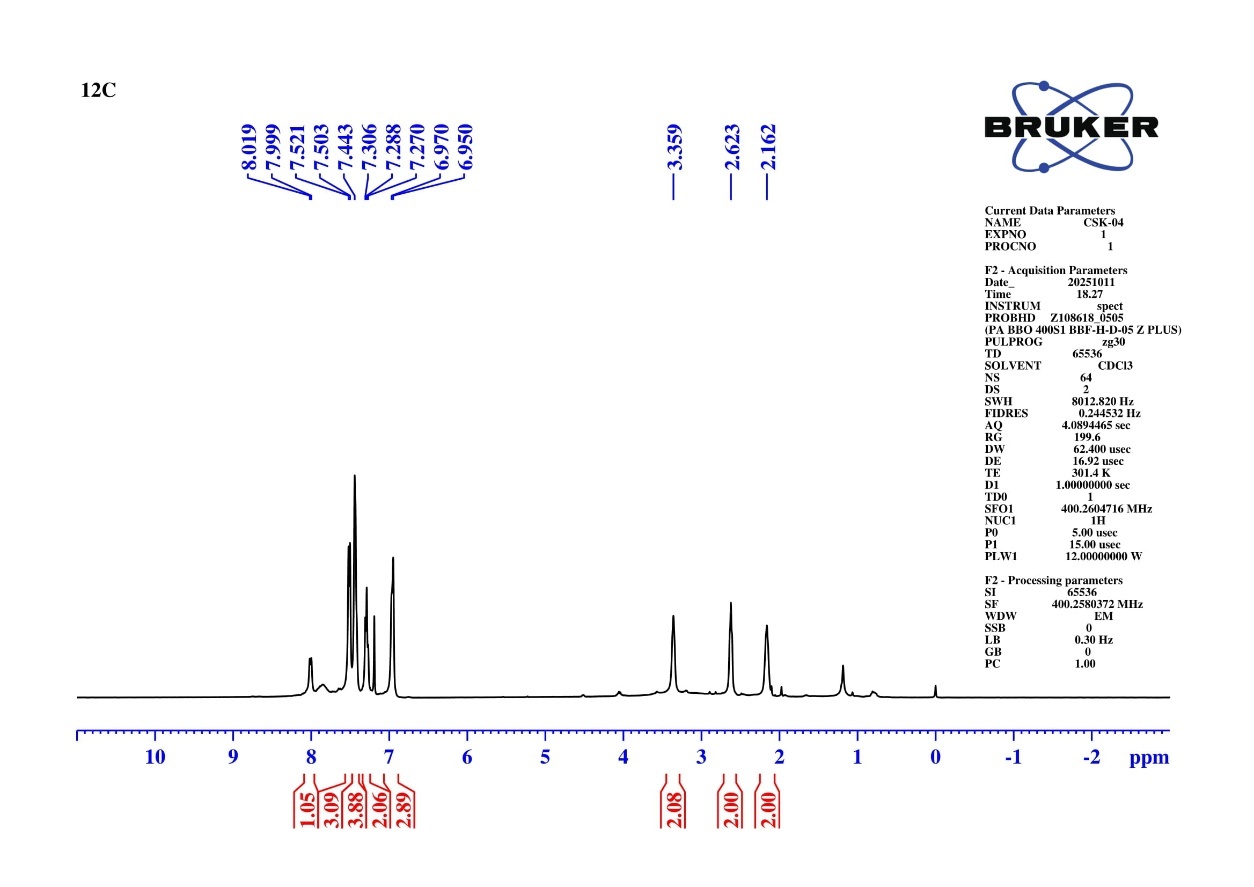
**

**
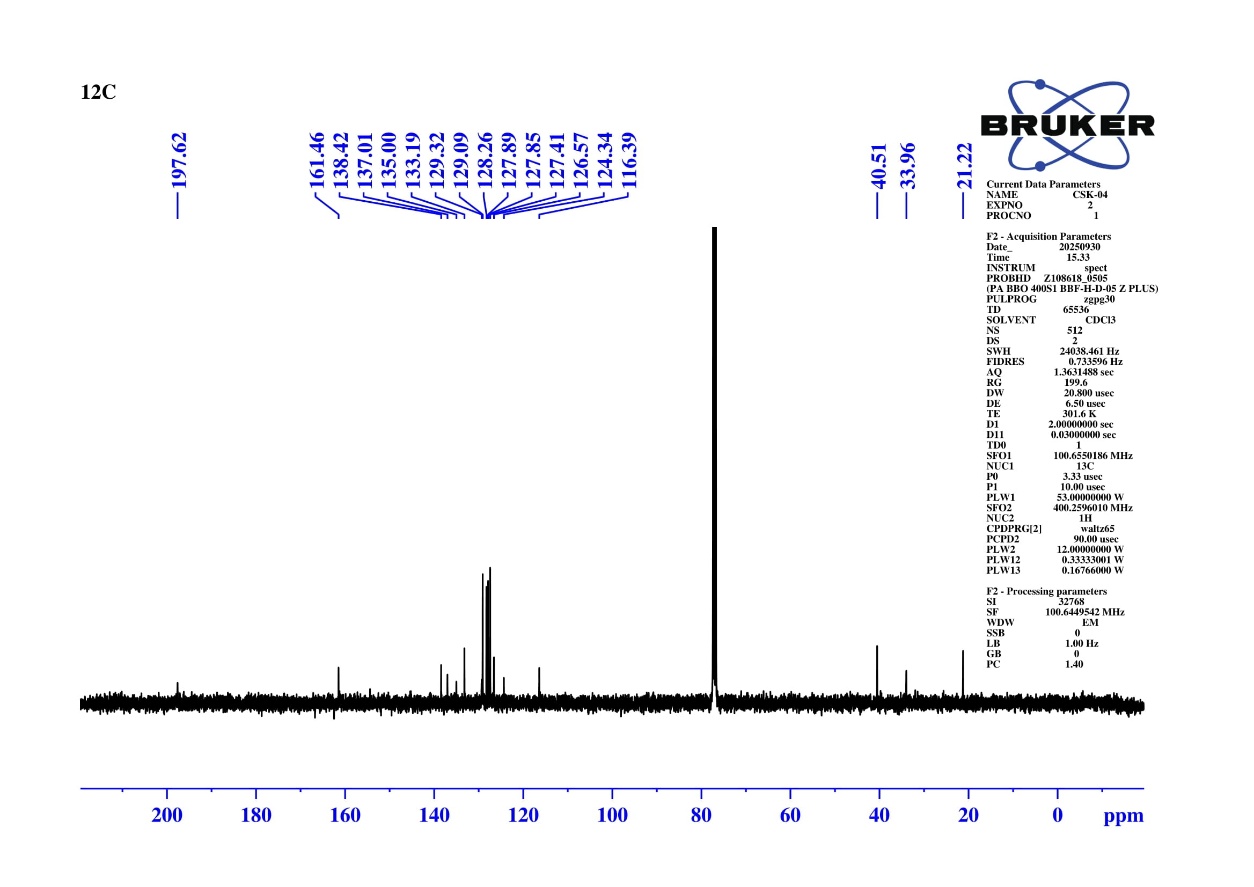
Fig S55** 13C NMR Spectrum of N-(8-oxo-9-phenyl-5,6,7,8-tetrahydroacridin-2-yl) benzenesulfonamide **(10c)**

**
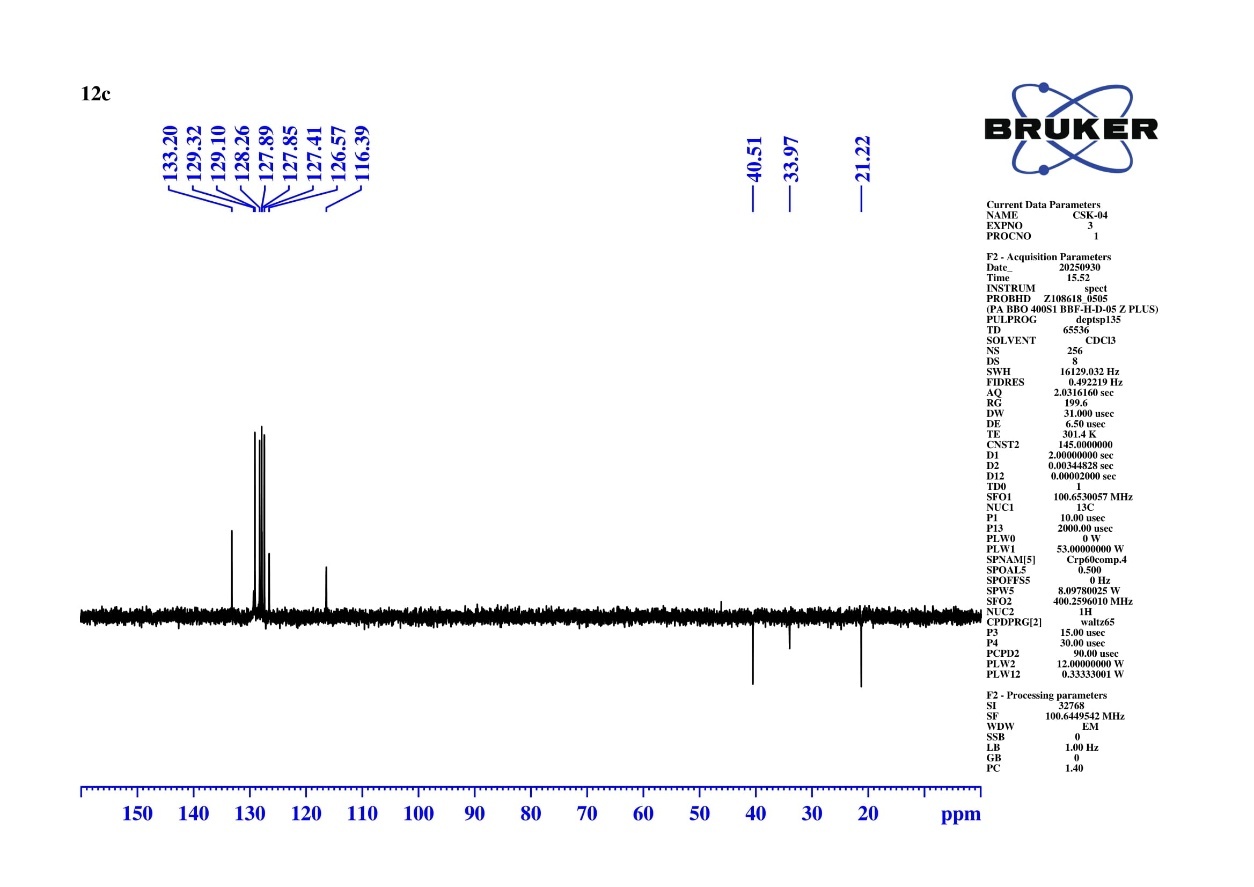

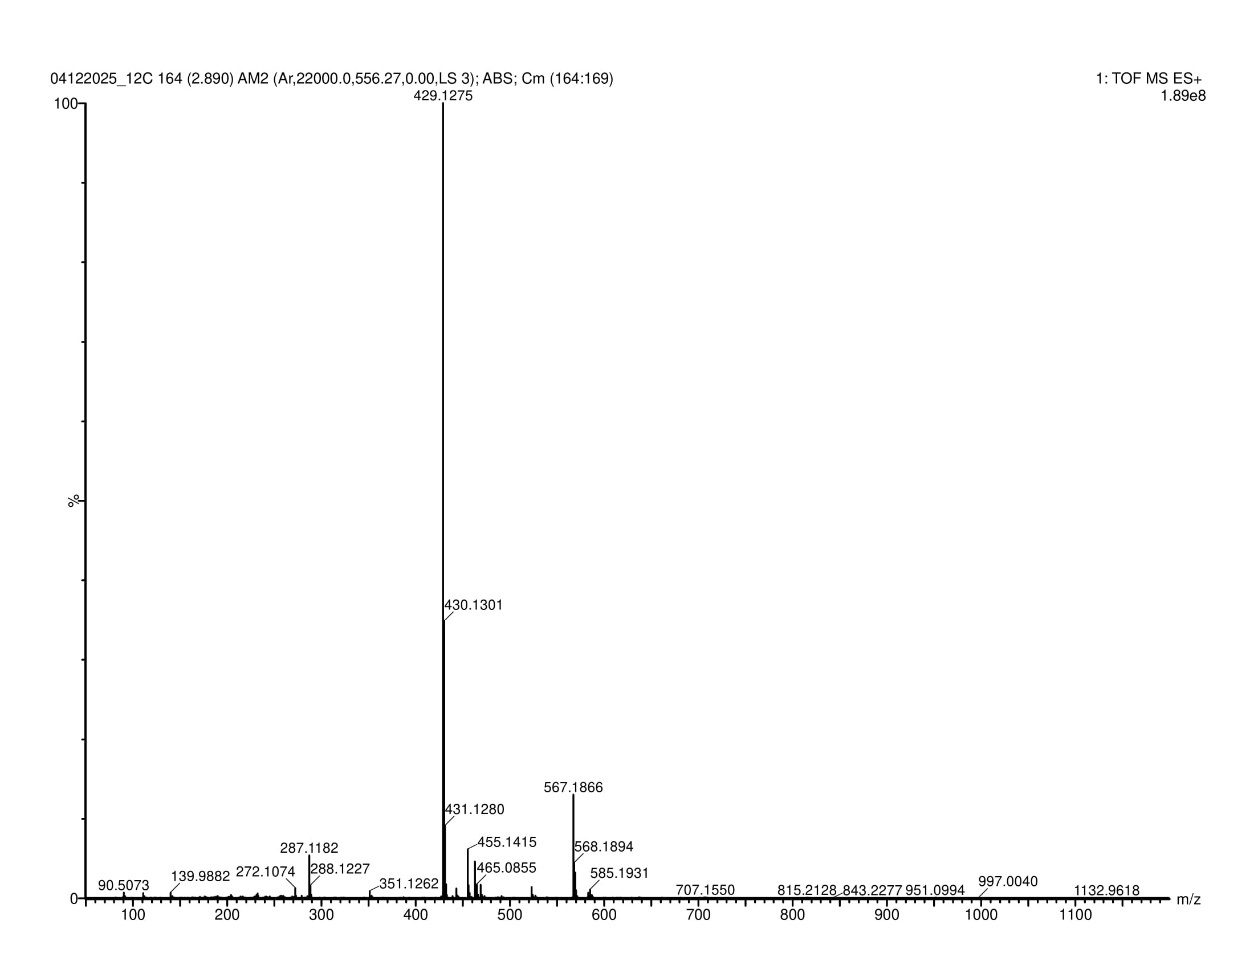
Fig S56** DEPT-135 NMR Spectrum of N-(8-oxo-9-phenyl-5,6,7,8-tetrahydroacridin-2-yl) benzenesulfonamide **(10c)**

Calculated Exact Mass = 429.1272

[M+H] = 429.1275

**Fig S57** HRMS Spectrum of N-(8-oxo-9-phenyl-5,6,7,8-tetrahydroacridin-2-yl) benzenesulfonamide **(10c)**

**Fig** **S58** 1H NMR Spectrum of N-(8-oxo-9-phenyl-5,6,7,8-tetrahydroacridin-2-yl) naphthalene-2-sulfonamide **(10d)
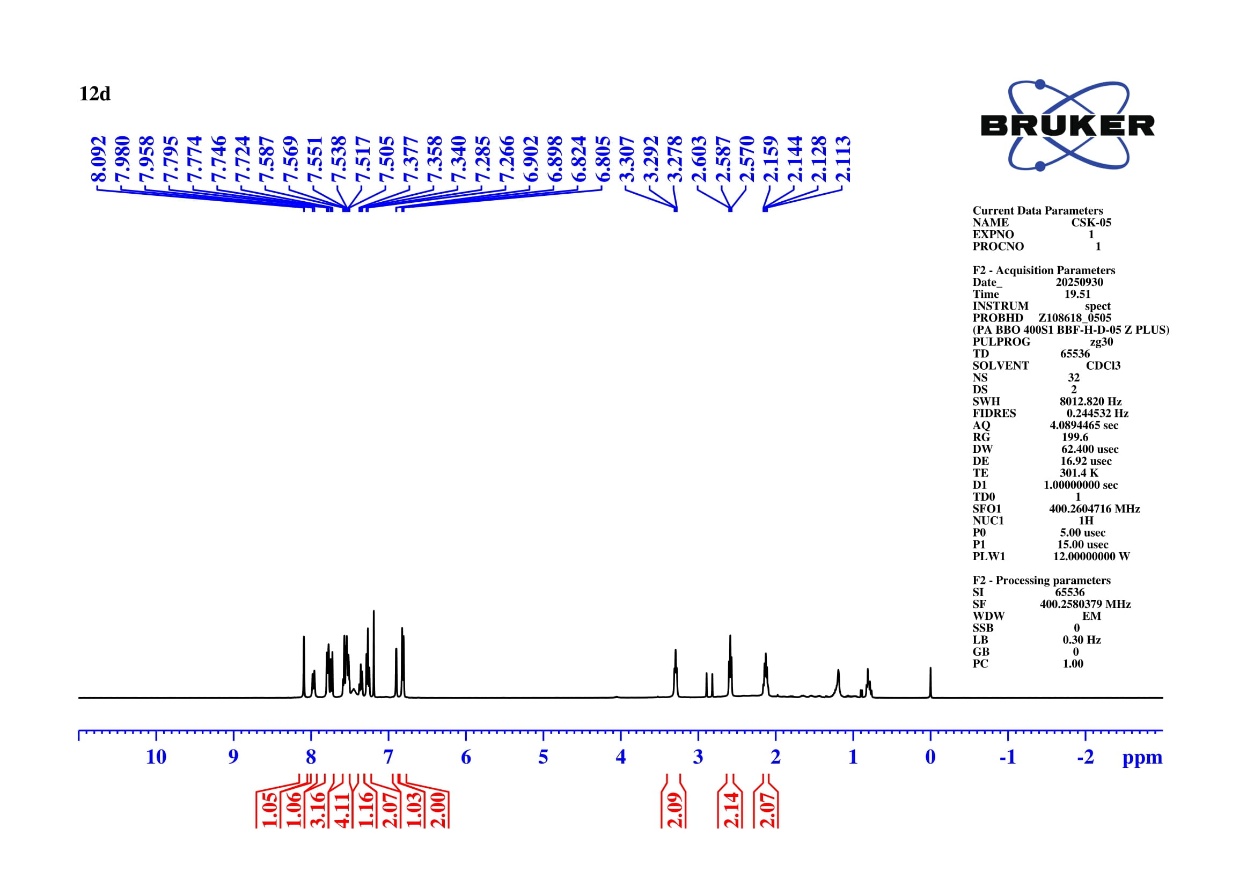
**

**
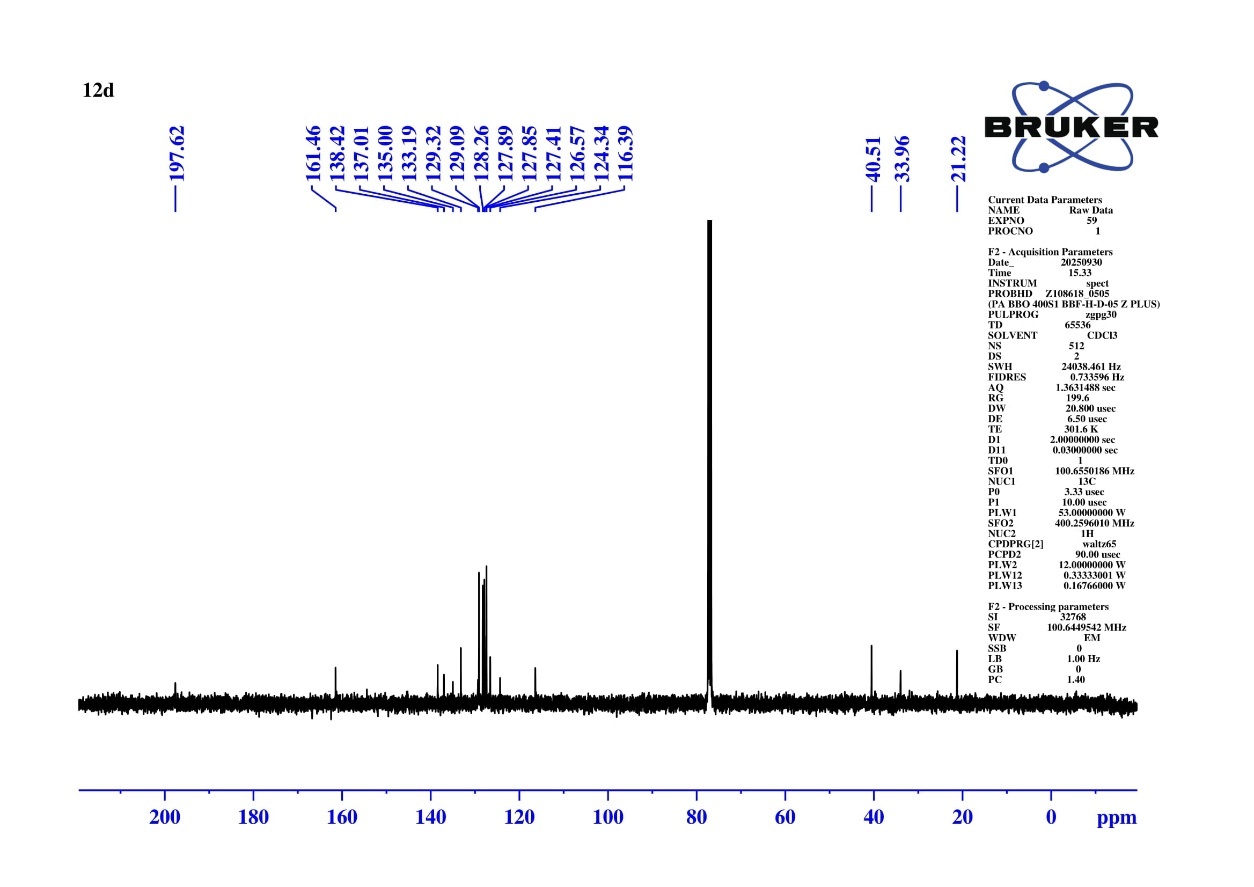
Fig S59** 13C NMR Spectrum of N-(8-oxo-9-phenyl-5,6,7,8-tetrahydroacridin-2-yl) naphthalene-2-sulfonamide **(10d)**

**
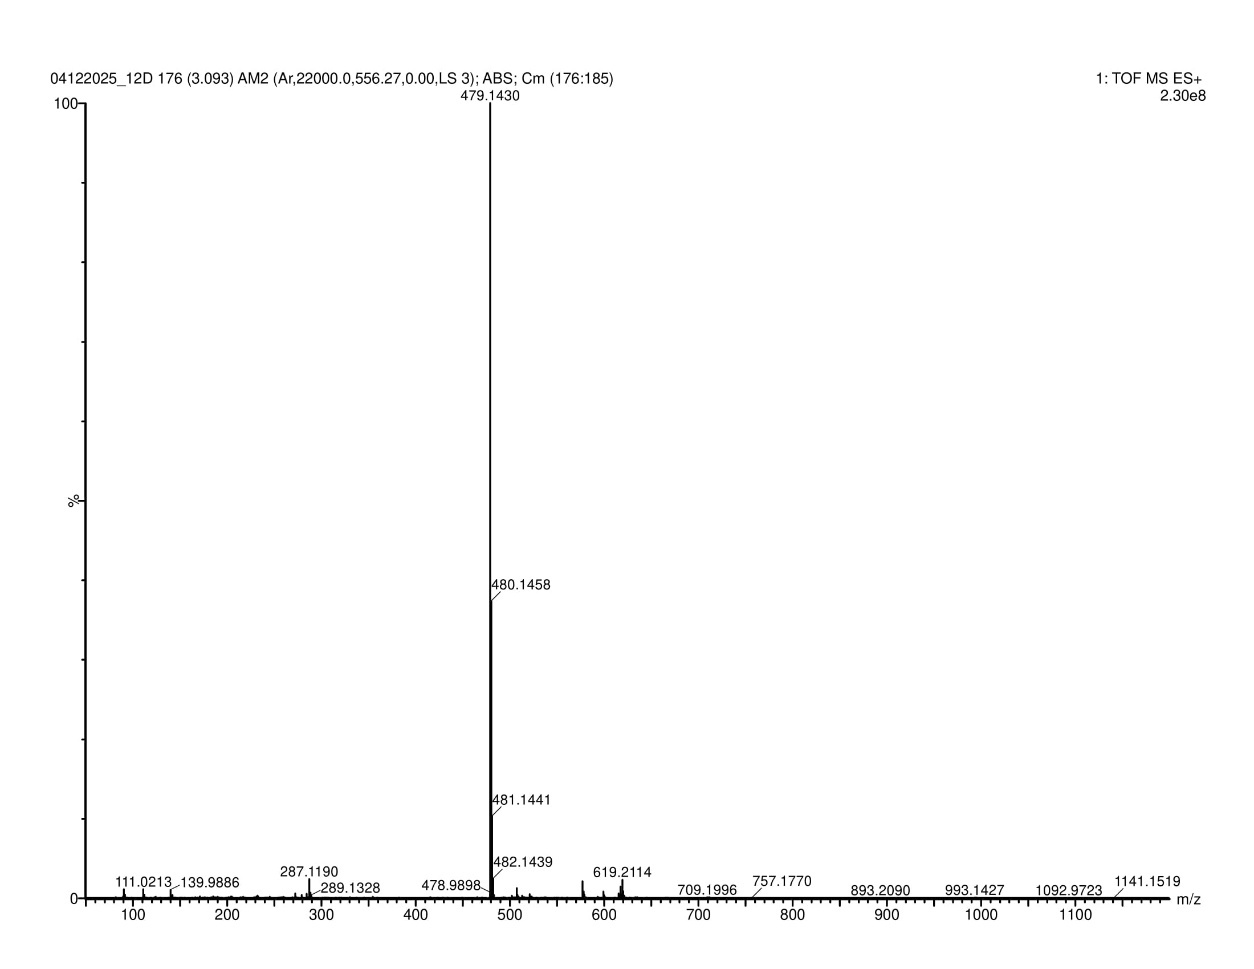

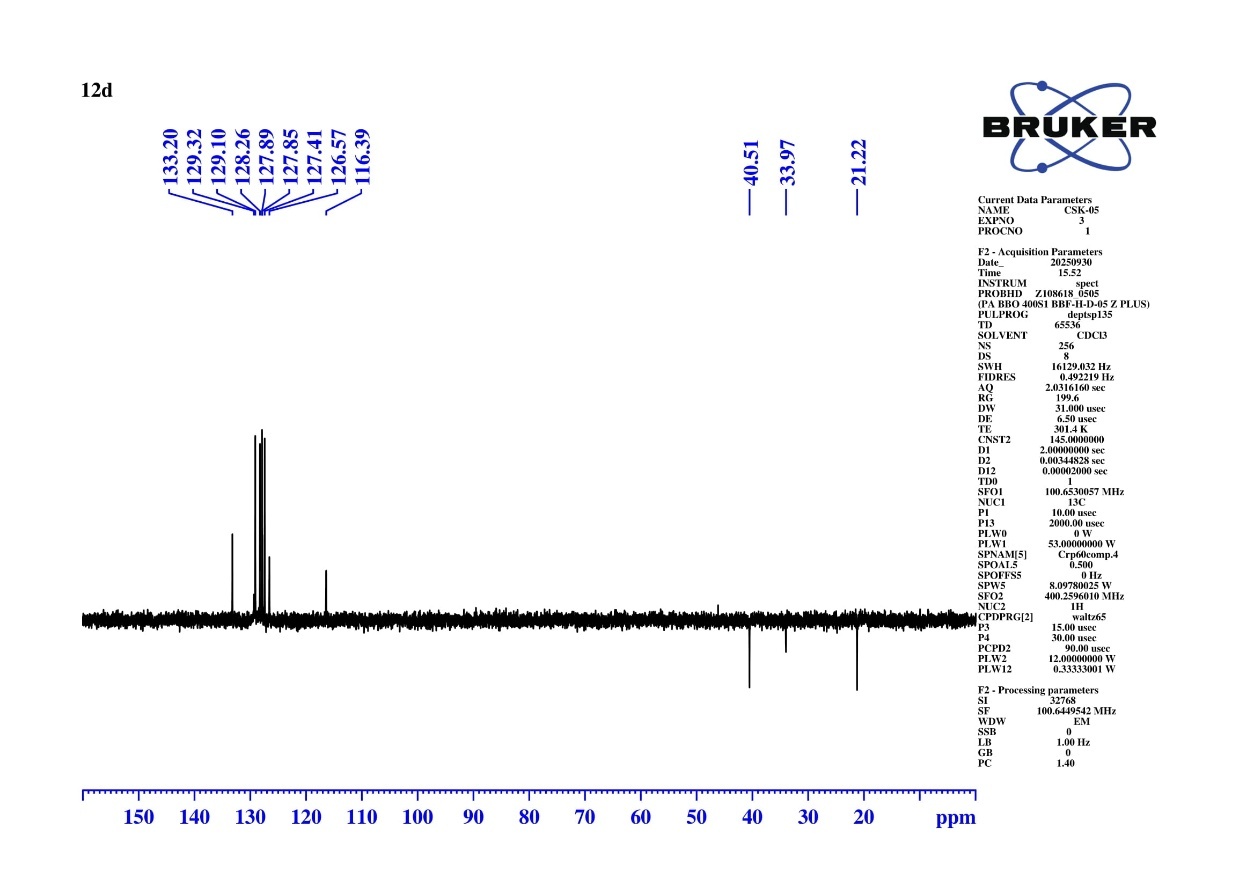
 Fig** **S60** DEPT-135 NMR Spectrum of N-(8-oxo-9-phenyl-5,6,7,8-tetrahydroacridin-2-yl) naphthalene-2-sulfonamide **(10d)**

Calculated Exact Mass = 479.1429

[M+H] = 479.1430

**Fig** **S61** HRMS Spectrum of N-(8-oxo-9-phenyl-5,6,7,8-tetrahydroacridin-2-yl) naphthalene-2-sulfonamide **(10d)**

**Fig S66** 1H NMR Spectrum of 4-chloro-N-(8-oxo-9-phenyl-5,6,7,8-tetrahydroacridin-2-yl) benzenesulfonamide **(10f)
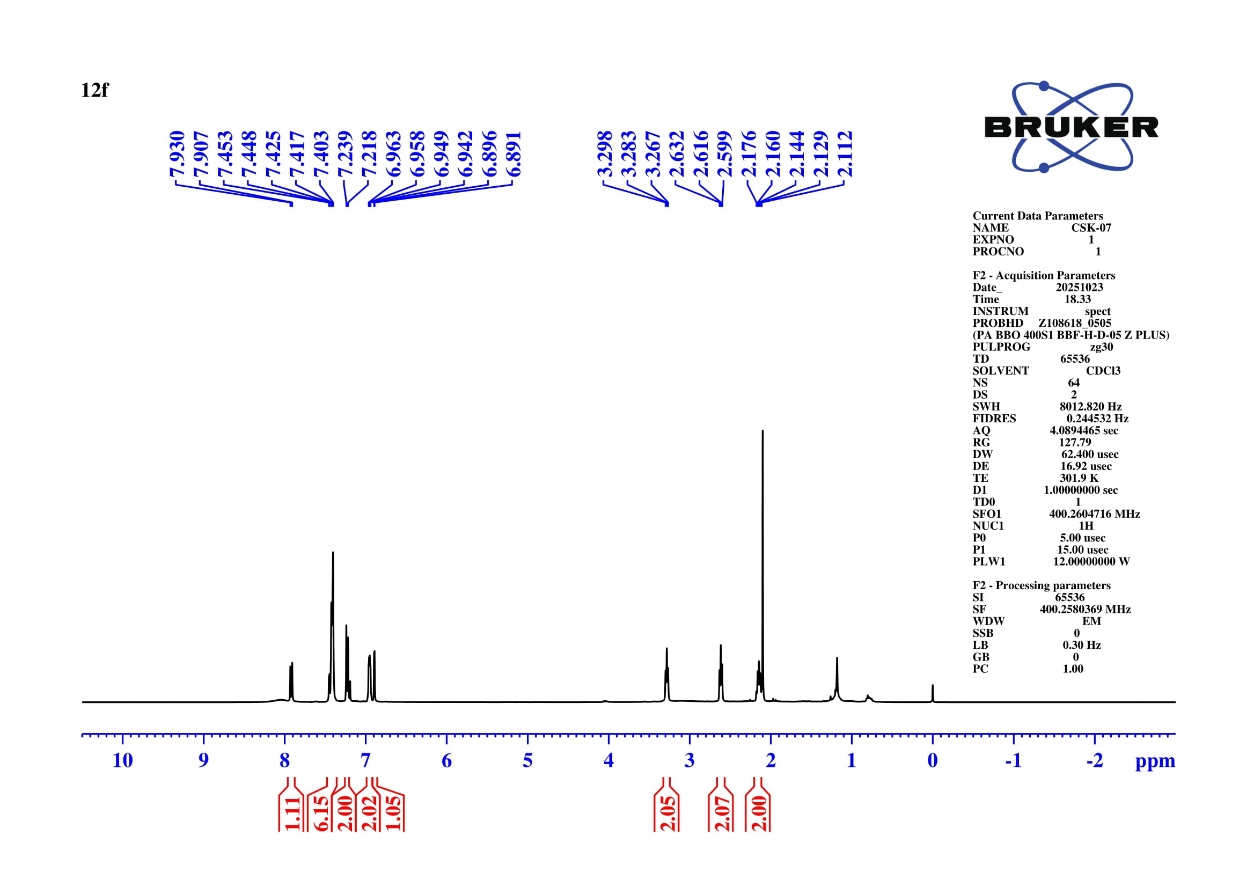
**

**
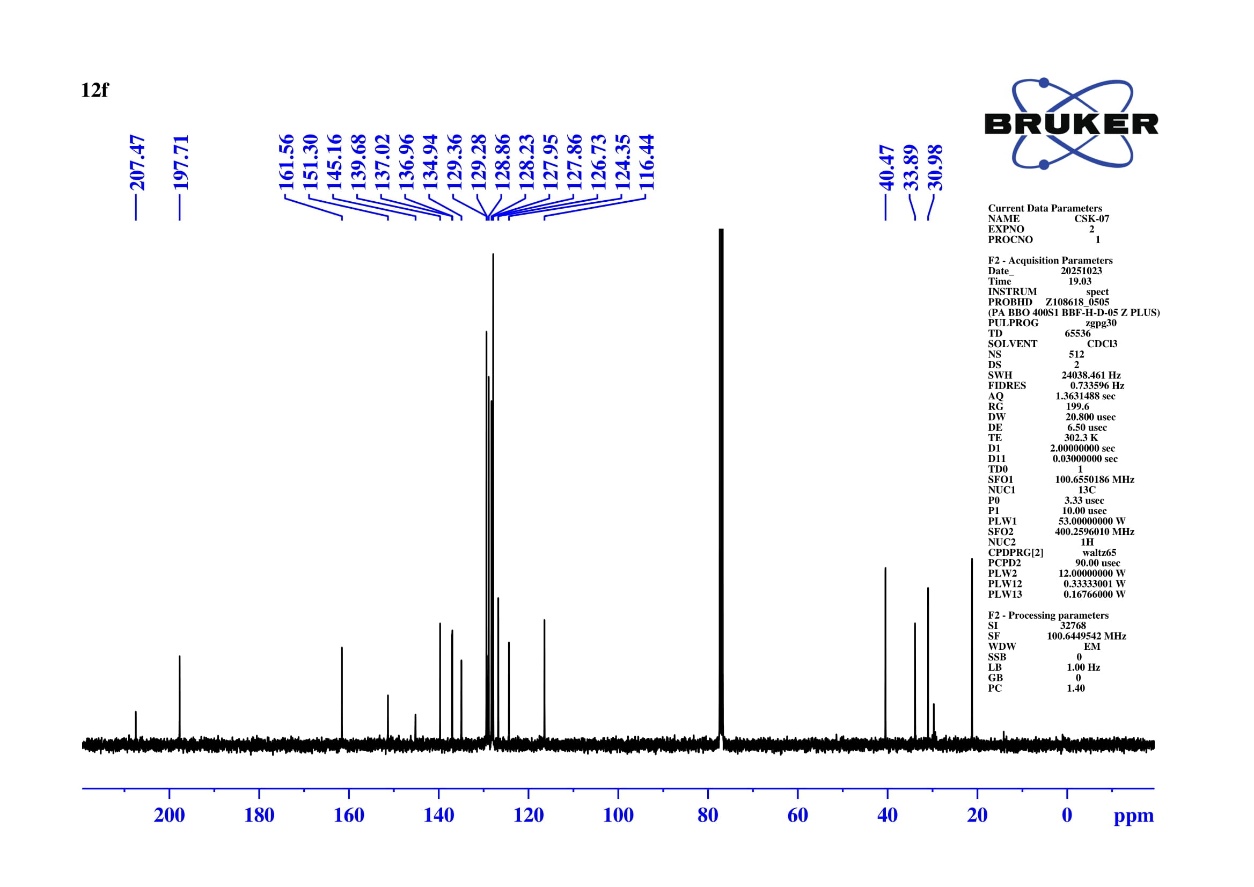
Fig S67** 13C NMR Spectrum of 4-chloro-N-(8-oxo-9-phenyl-5,6,7,8-tetrahydroacridin-2-yl) benzenesulfonamide **(10f)**

**
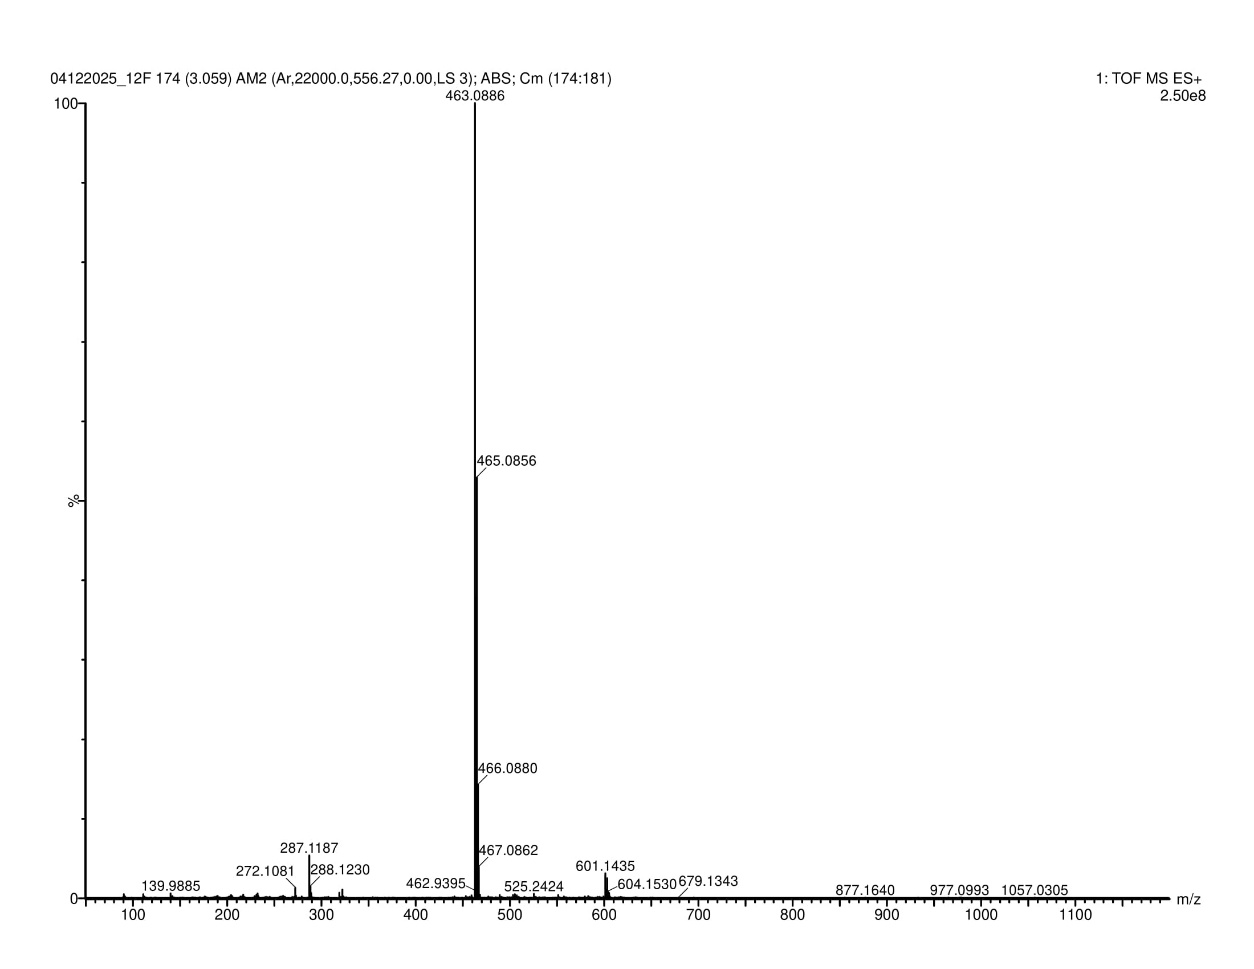
Fig S68** DEPT-135 NMR Spectrum of 4-chloro-N-(8-oxo-9-phenyl-5,6,7,8-tetrahydroacridin-2-yl) benzenesulfonamide **(10f)
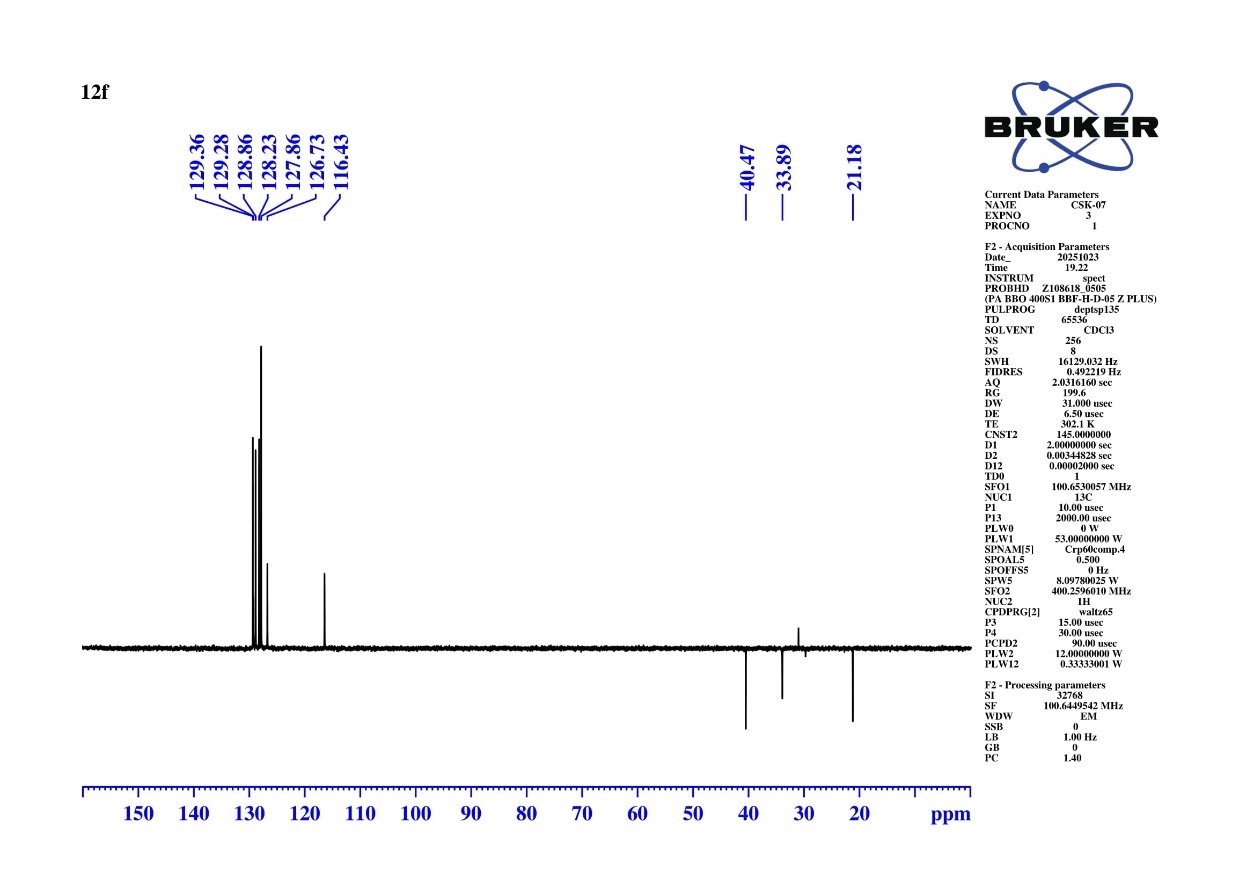
**

Calculated Exact Mass = 463.0883

[M+H] = 463.0886

**Fig S69** HRMS Spectrum of of 4-chloro-N-(8-oxo-9-phenyl-5,6,7,8-tetrahydroacridin-2-yl) benzenesulfonamide **(10f)**

**Fig S70** 1H NMR Spectrum of 4-bromo-N-(8-oxo-9-phenyl-5,6,7,8-tetrahydroacridin-2-yl) benzenesulfonamide **(10g)
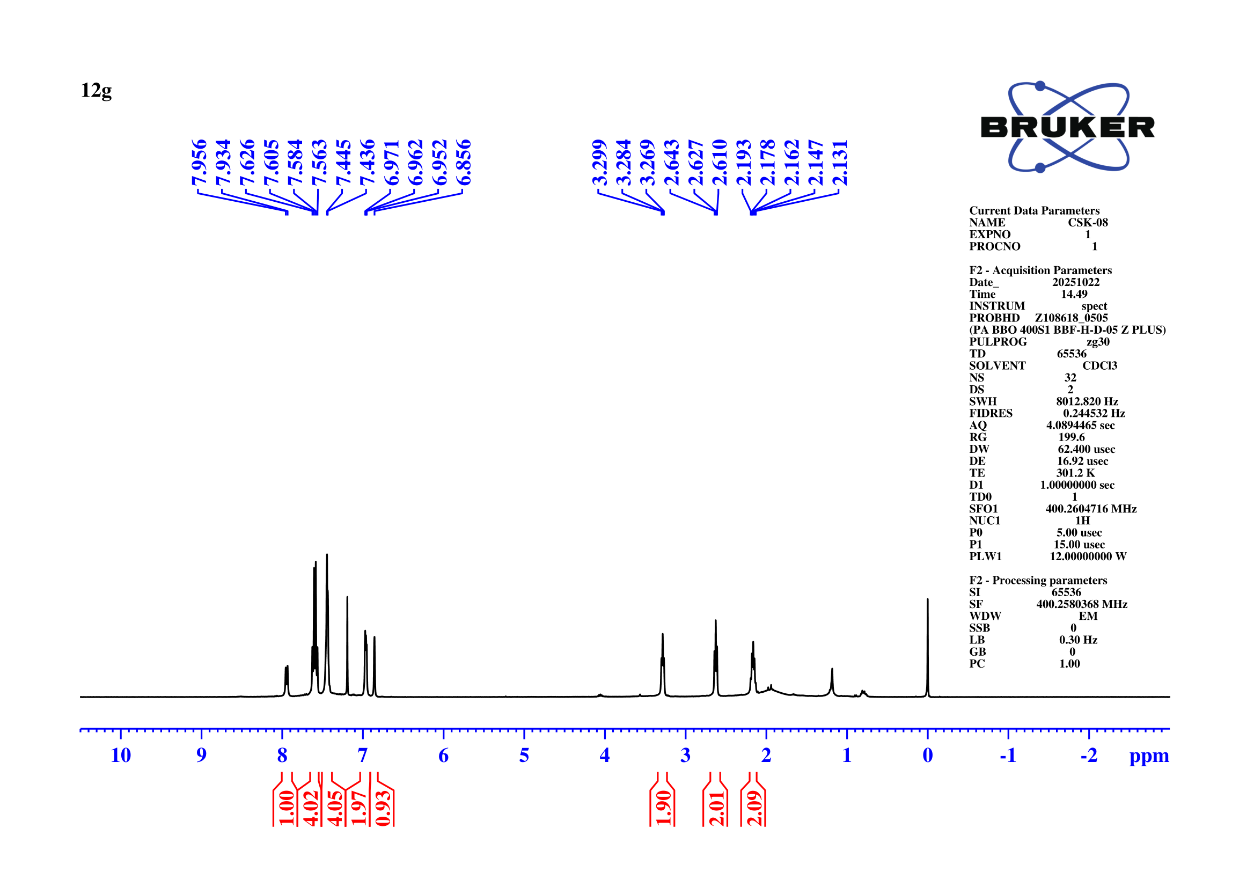
**

**Fig S71** 13C NMR Spectrum of 4-bromo-N-(8-oxo-9-phenyl-5,6,7,8-tetrahydroacridin-2-yl) benzenesulfonamide **(1
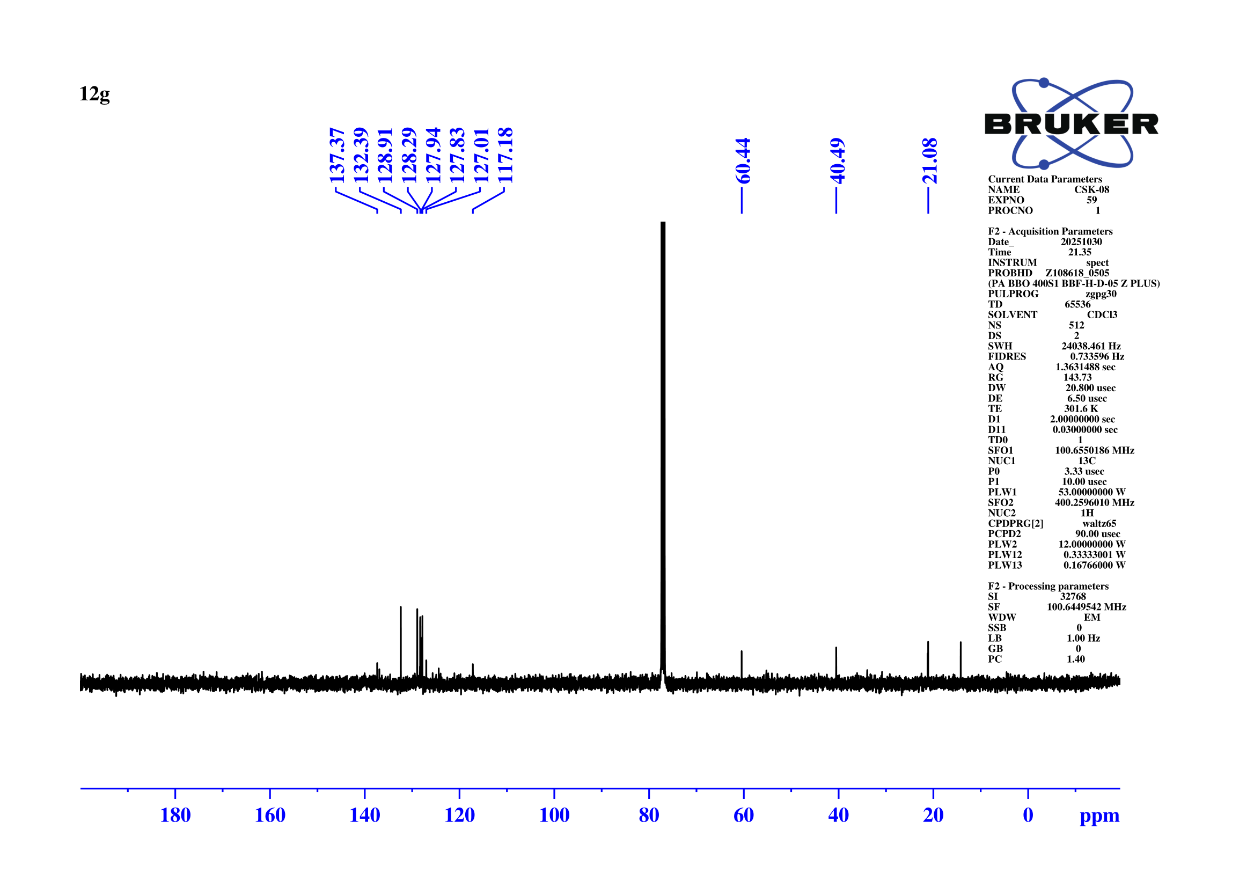
0g)**

**Fig S72** DEPT-135 NMR Spectrum of 4-bromo-N-(8-oxo-9-phenyl-5,6,7,8-tetrahydroacridin-2-yl) benzenesulfonamide **(10g)
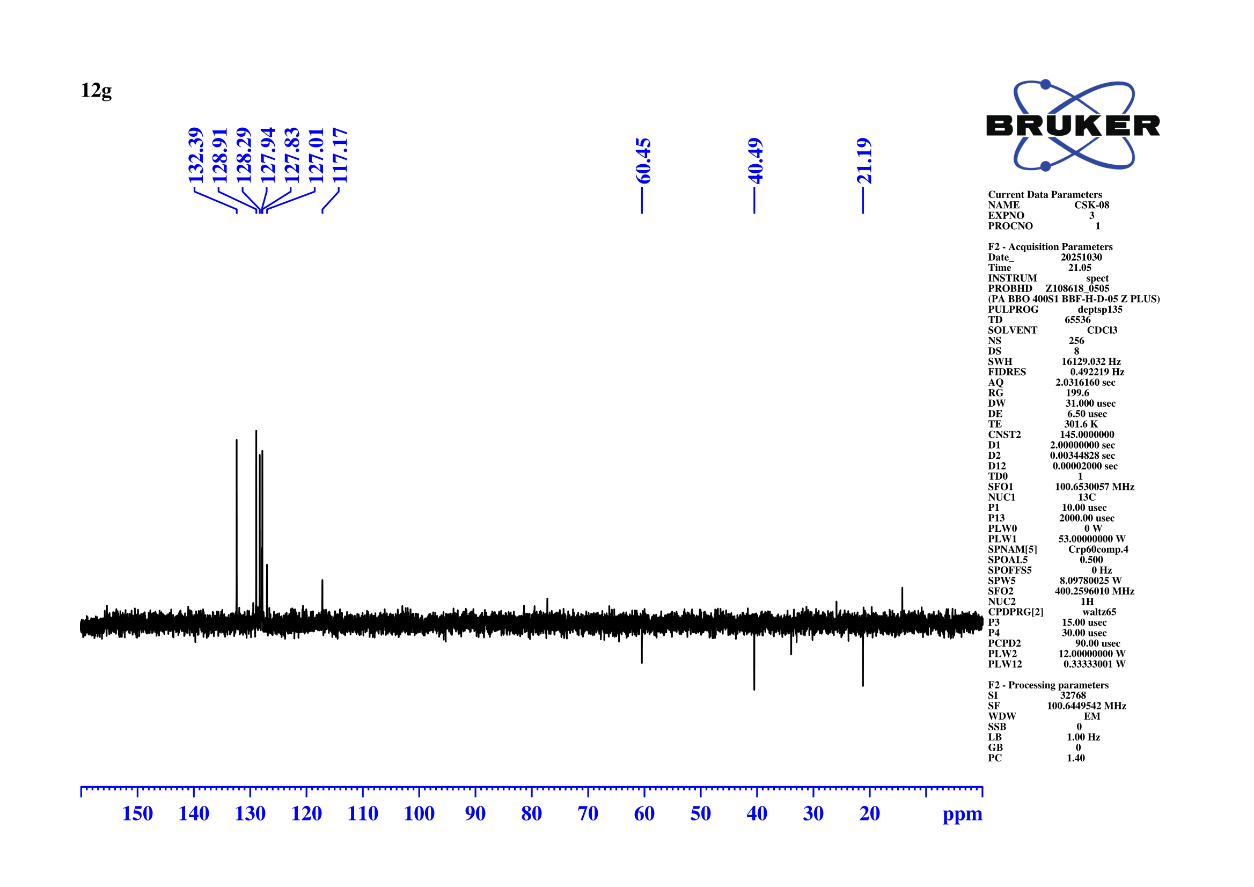
**

Calculated Exact Mass = 507.0378

[M+H] = 507.0375

**
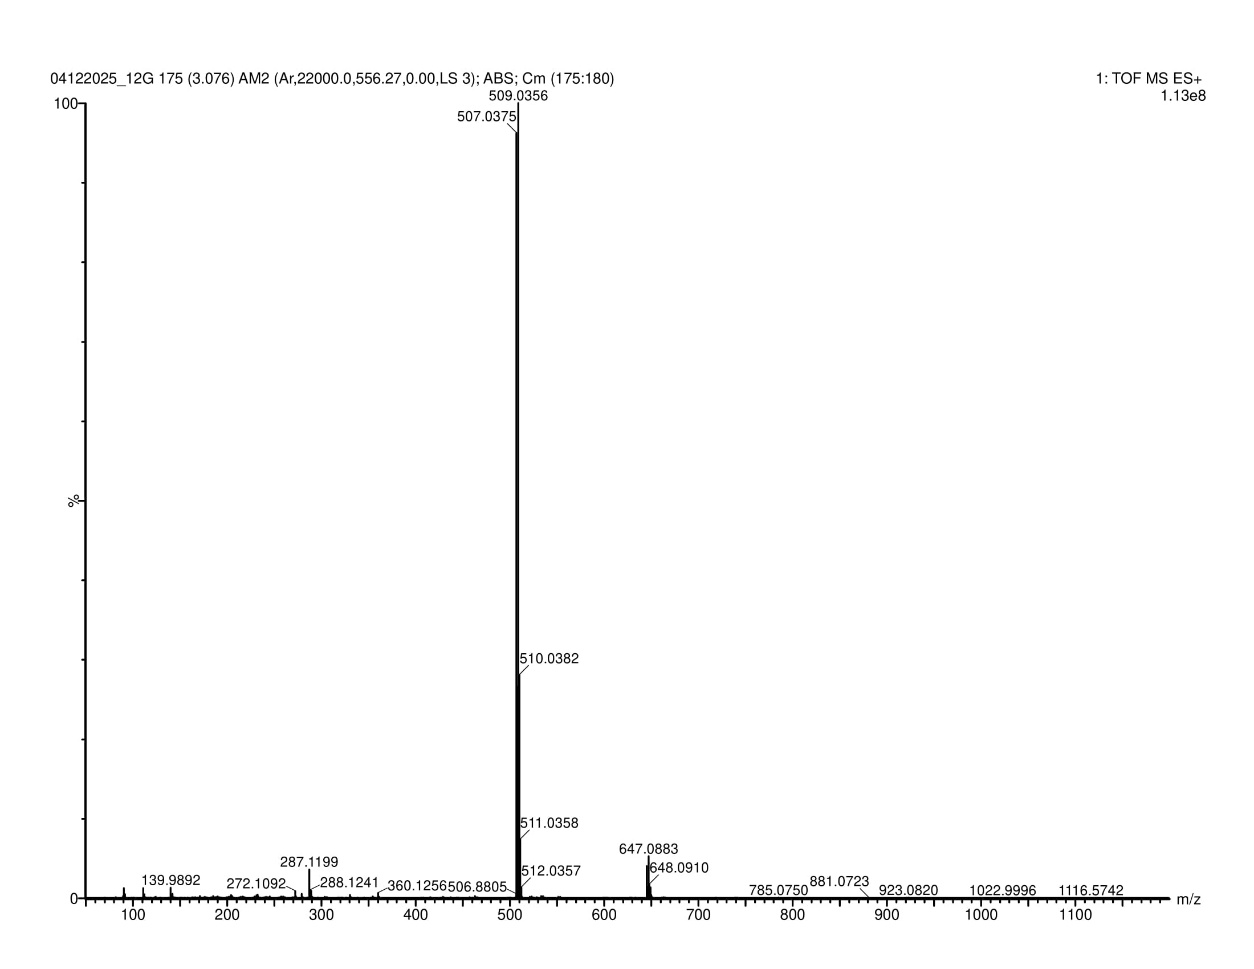
Fig S73** HMRS Spectrum of 4-bromo-N-(8-oxo-9-phenyl-5,6,7,8-tetrahydroacridin-2-yl) benzenesulfonamide **(10g)**

**Fig S78** 1H NMR Spectrum of 4-iodo-N-(8-oxo-9-phenyl-5,6,7,8-tetrahydroacridin-2-yl) benzenesulfonamide **(10i)
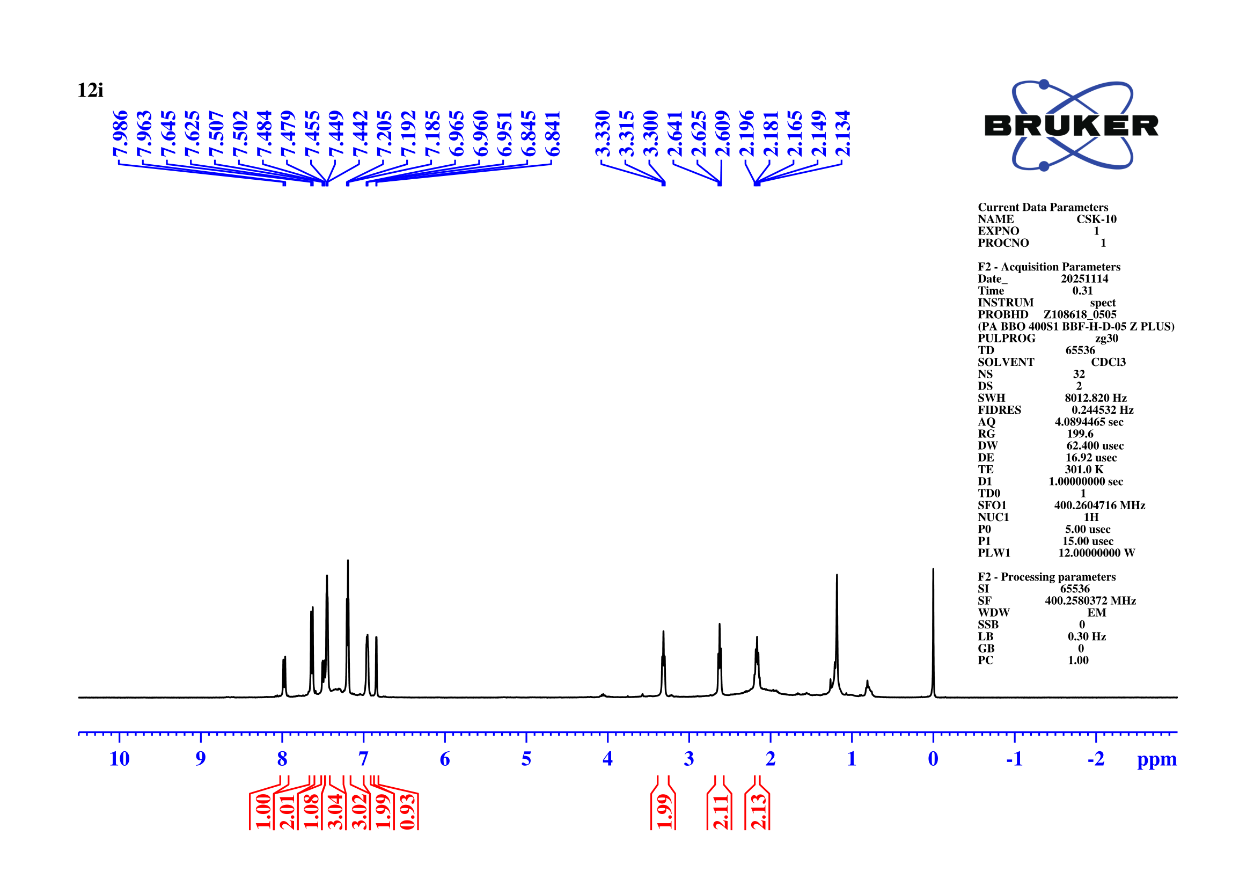
**

**
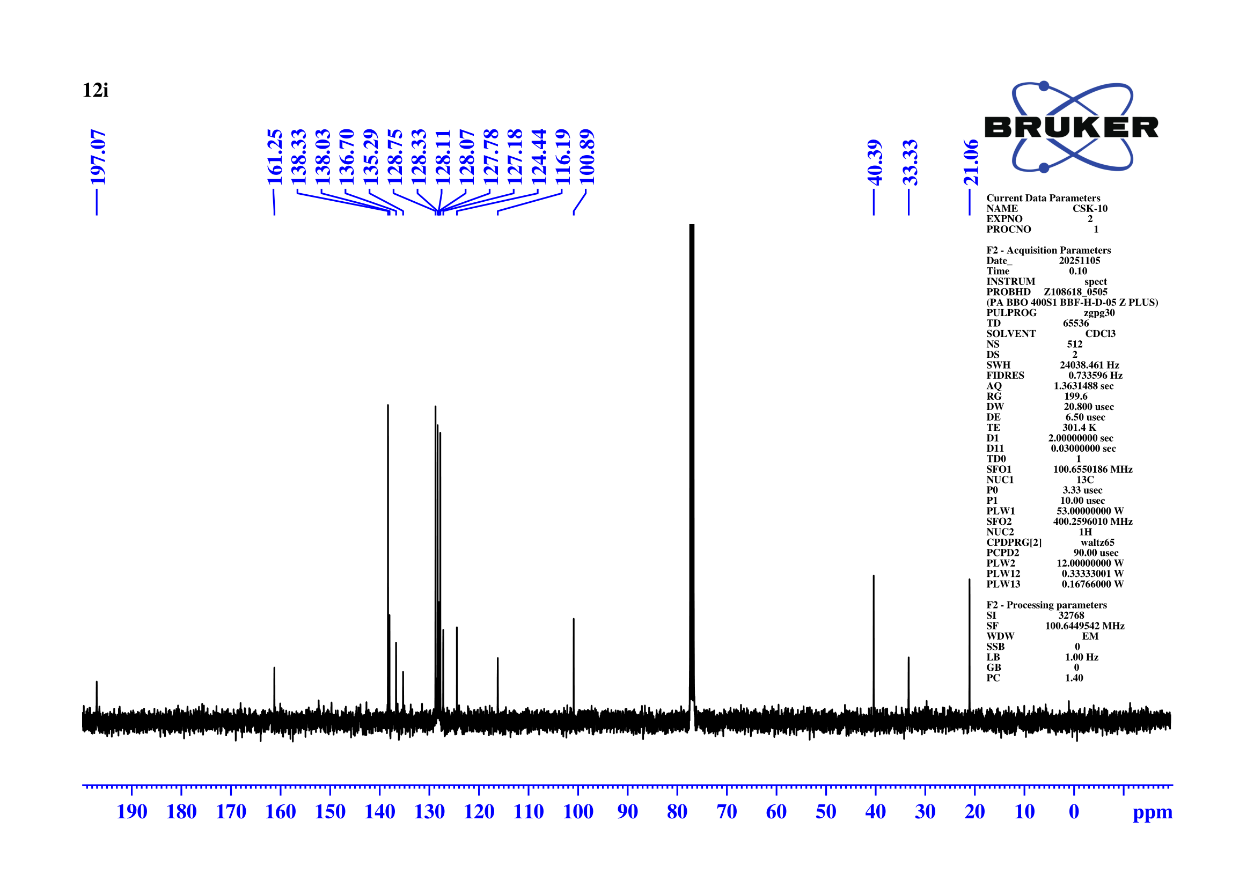
Fig S79** 13C NMR Spectrum of 4-iodo-N-(8-oxo-9-phenyl-5,6,7,8-tetrahydroacridin-2-yl) benzenesulfonamide **(10i)**

**
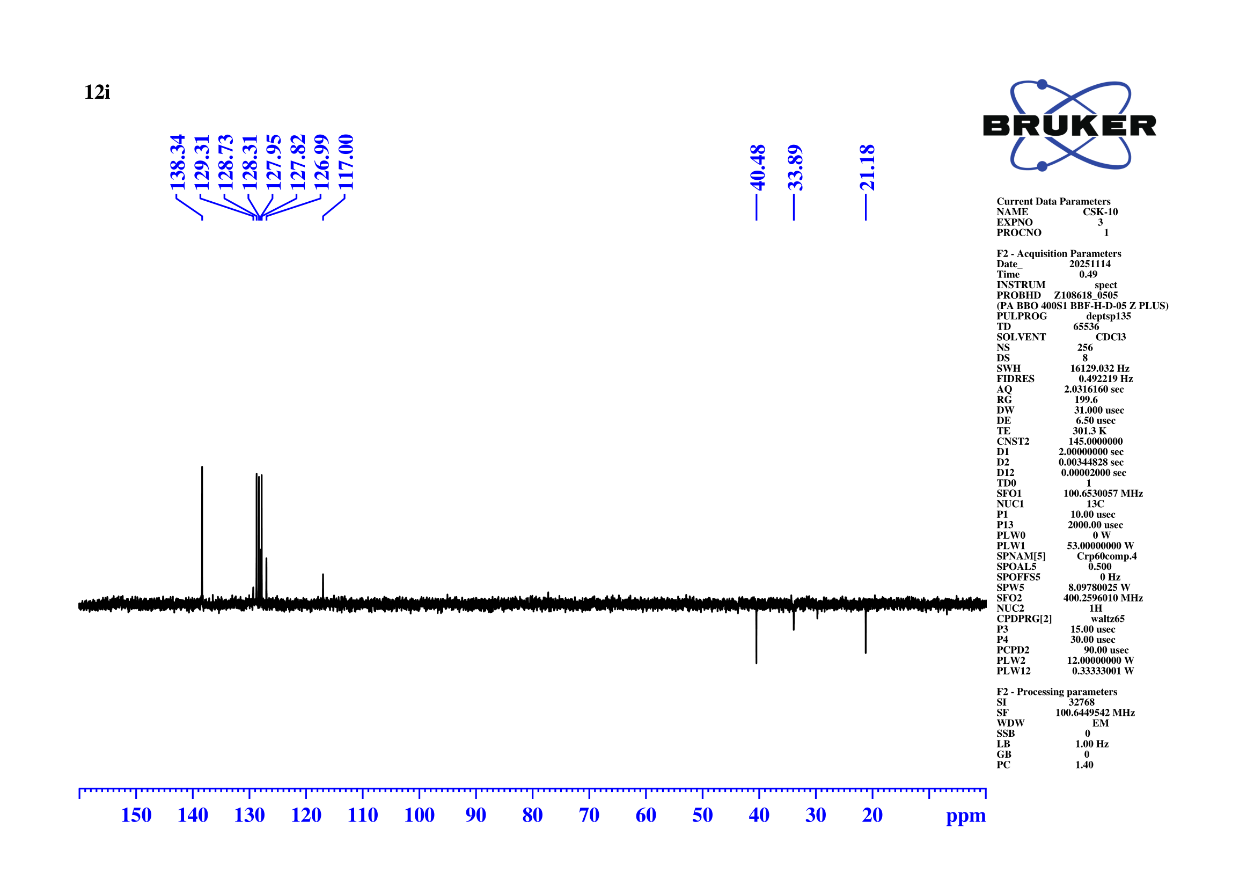
Fig S80** DEPT-135 NMR Spectrum of 4-iodo-N-(8-oxo-9-phenyl-5,6,7,8-tetrahydroacridin-2-yl) benzenesulfonamide **(10i)**

Calculated Exact Mass = 555.0239

[M+H] = 555.0241

**Fig S81** HRMS Spectrum of 4-iodo-N-(8-oxo-9-phenyl-5,6,7,8-tetrahydroacridin-2-yl) benzenesulfonamide **(10i)
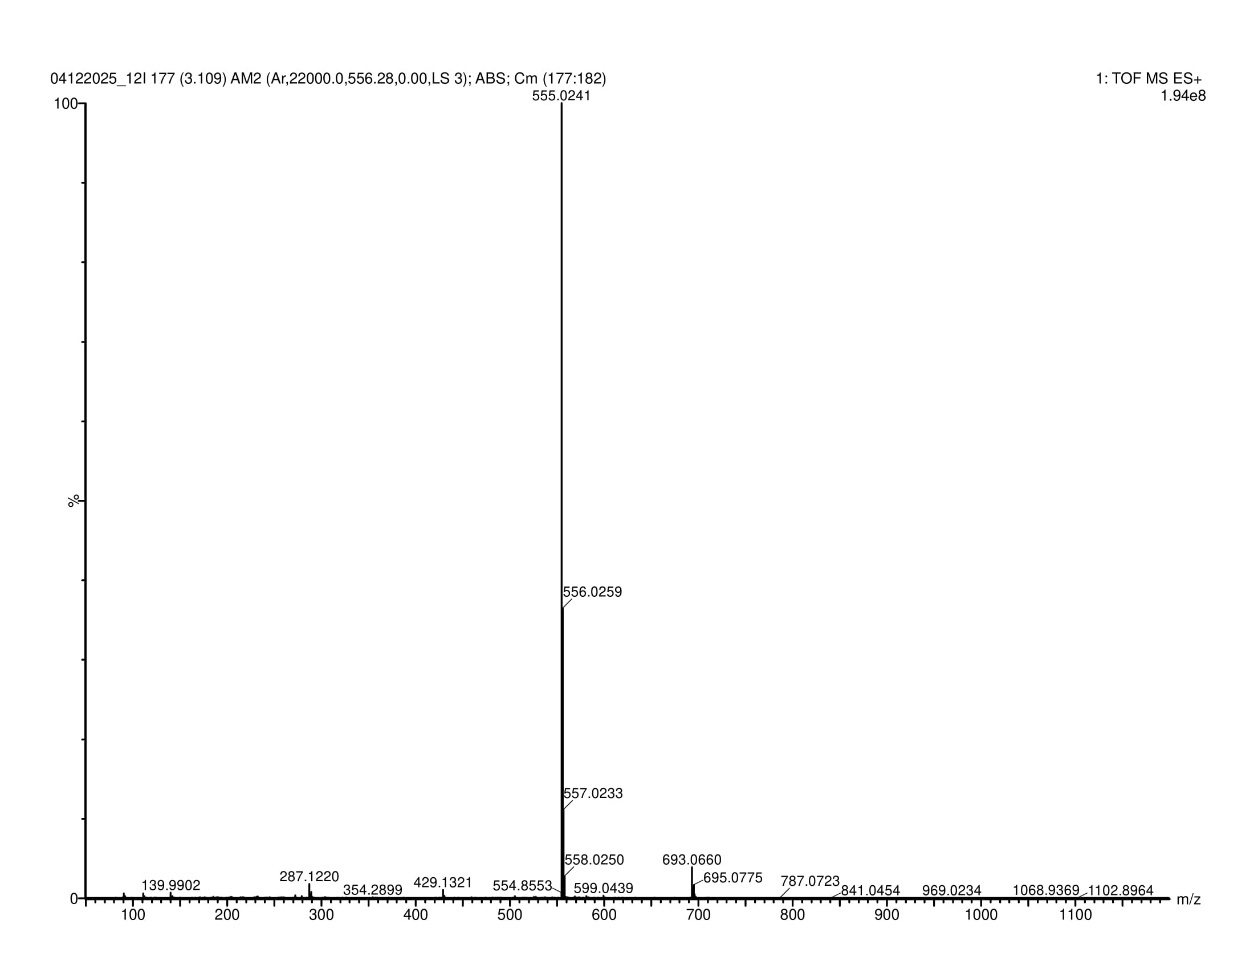
**

**
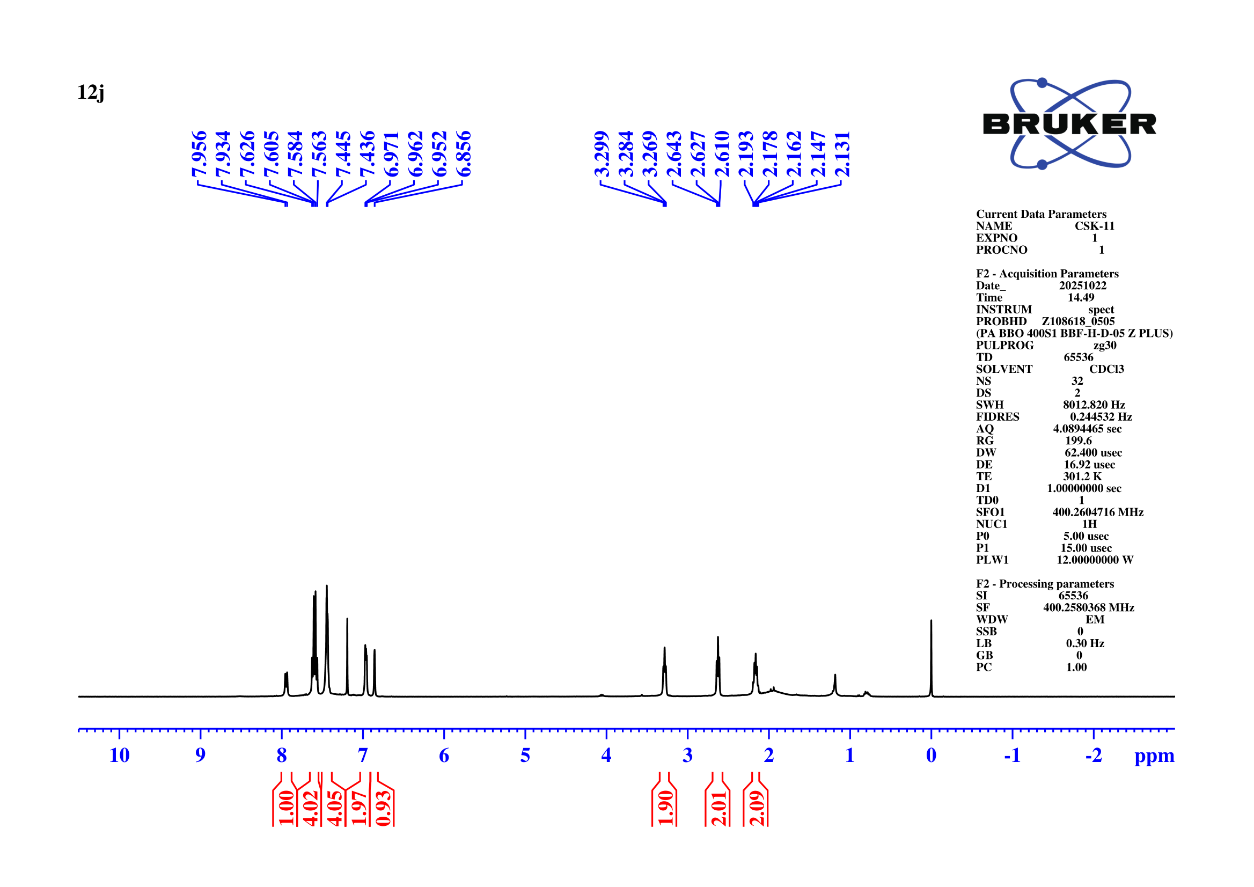
Fig S82** 1H NMR Spectrum of 4-cyano-N-(8-oxo-9-phenyl-5,6,7,8-tetrahydroacridin-2-yl) benzenesulfonamide **(10j)**

**
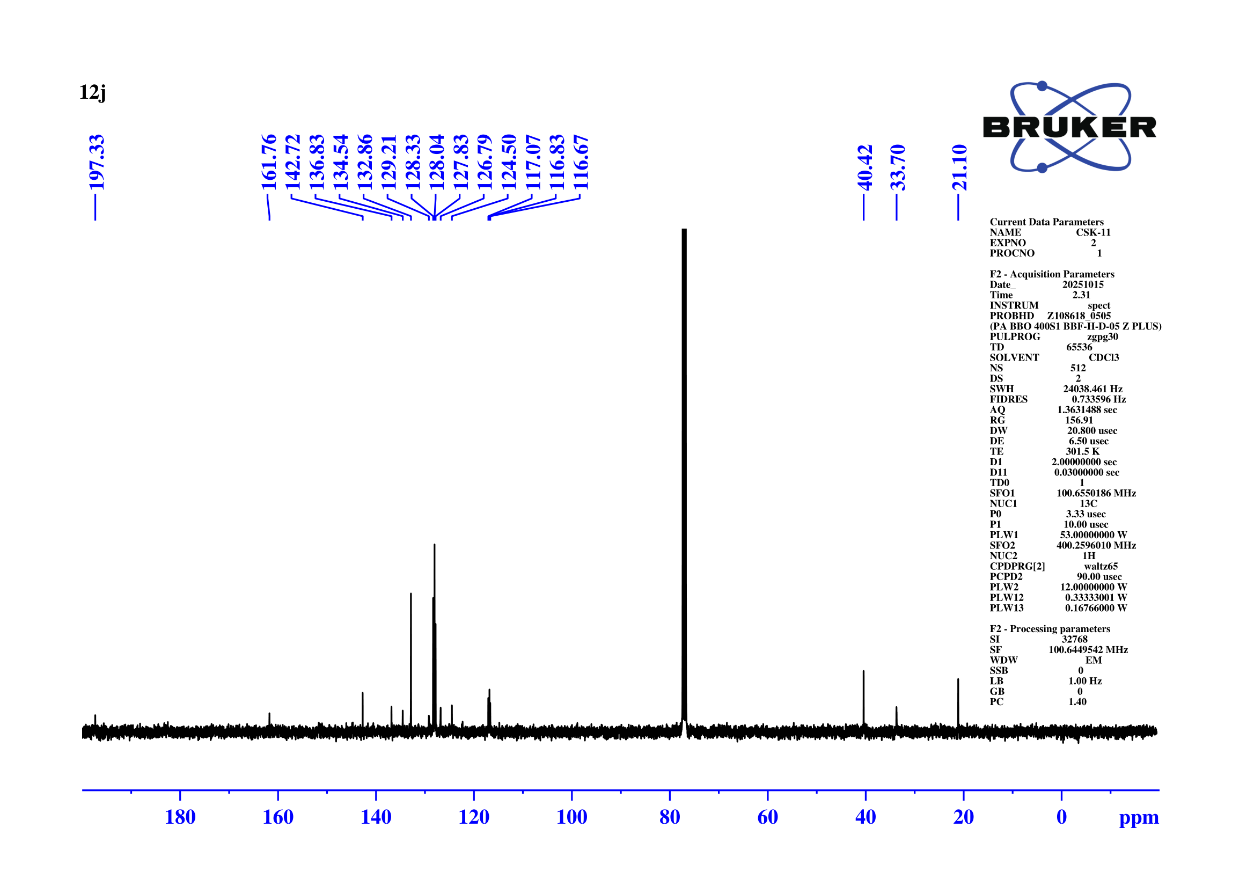
**

**Fig S83** 13C NMR Spectrum of 4-cyano-N-(8-oxo-9-phenyl-5,6,7,8-tetrahydroacridin-2-yl) benzenesulfonamide **(10j)**

**
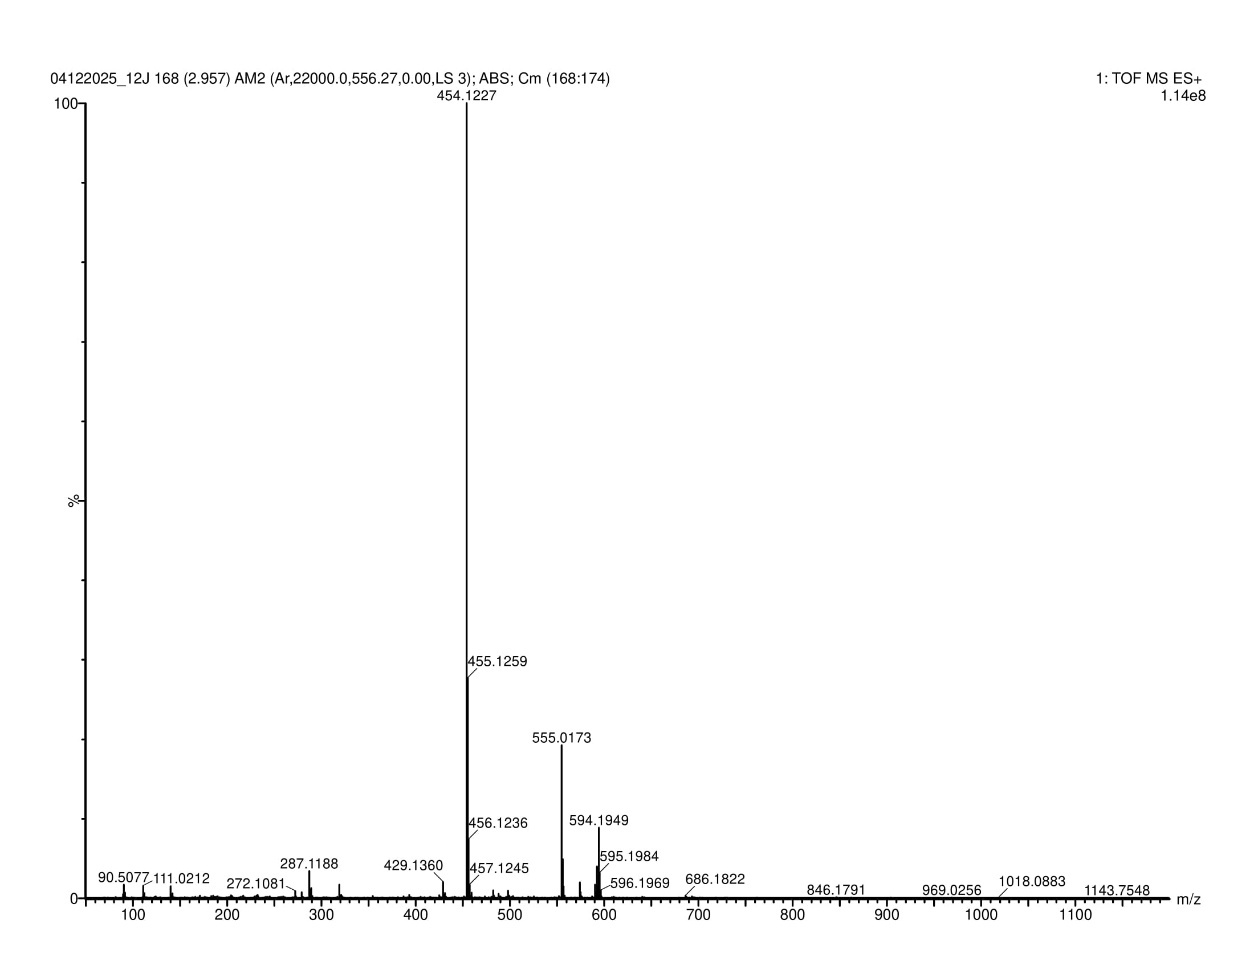

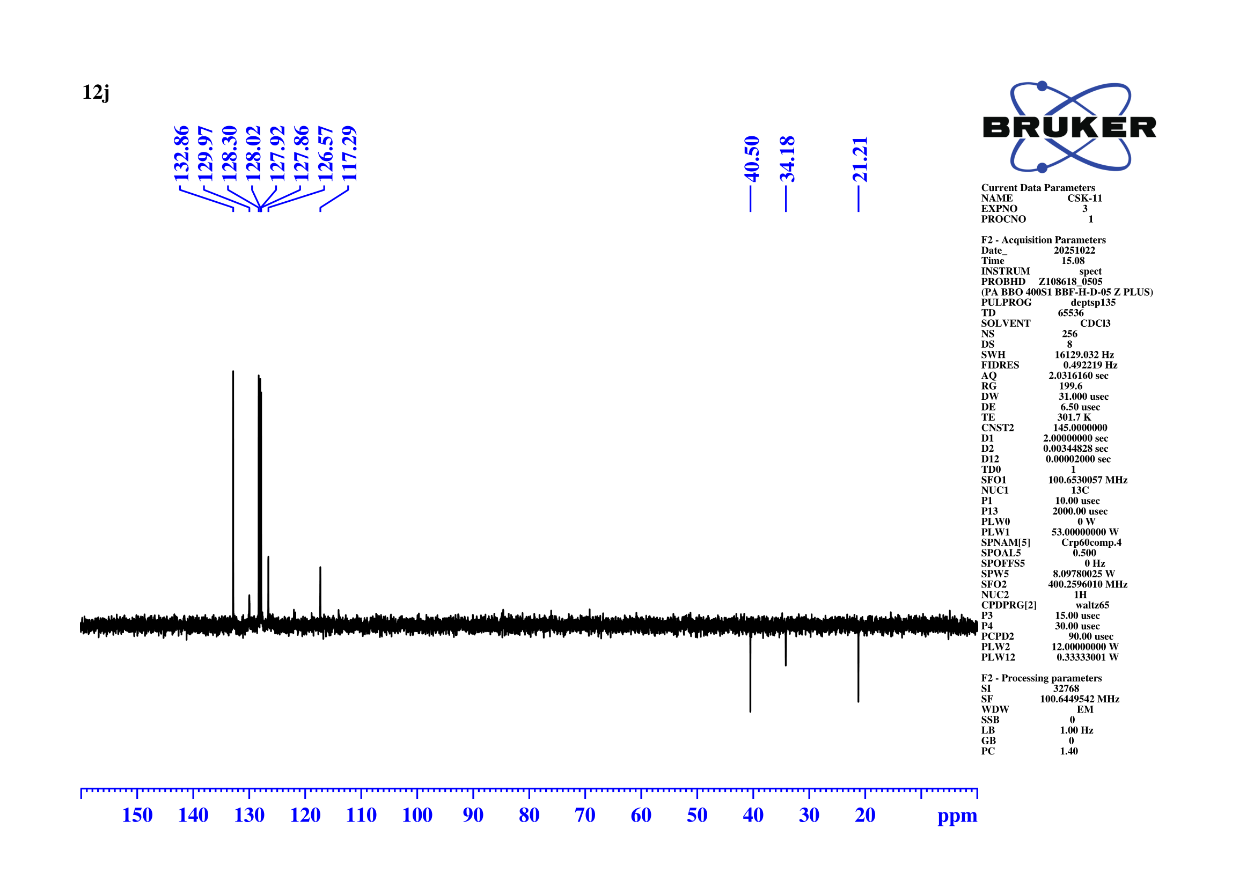
Fig S84** DEPT-135 NMR Spectrum of 4-cyano-N-(8-oxo-9-phenyl-5,6,7,8-tetrahydroacridin-2-yl) benzenesulfonamide **(10j)**

Calculated Exact Mass = 454.1225

[M+H] = 454.1227

**Fig S85** HRMS Spectrum of 4-cyano-N-(8-oxo-9-phenyl-5,6,7,8-tetrahydroacridin-2-yl) benzenesulfonamide **(10j)**
